# Supplementary material for: Assessing willingness to wear face masks to guide protection strategies in future pandemics
Source: Research Square preprint supplement (doi:10.21203/rs.3.rs-7075786/v1), 2025-08-21
Supplement: Supplementary file 1 [file 270c3c5b41d094dfeedf9fe9.xlsx]

## Sheet: Data_Face Coverings
Q2	Q3	Q4	Q5	Q6	Q7	Q8_4	Q8_5	Q8_6	Q9_1	Q9_2	Q9_3	Q10_1	Q10_2	Q10_3	Q11	Q12	Q14	Q15	Q16	Q17	Q18	Q19	Q20_1	Q20_2	Q20_3	Q20_4	Q20_5	Q20_6	Q20_7	Q20_8	PKW_1	PKW_2	PKW_3	PTM_1	PTM_2	PTM_3	Q21_1	Q21_2	Q21_3	Q21_4	Q36_1	Q36_2	Q36_3	Q36_4	Q37_1	Q37_2	Q37_3	Q37_4	Q37_5
2	I was forced to by the places I went.	No one else did it. I wasn't going to be the only one. Plus, I didn't think they worked.	2	N/A	I have a small face and masks are uncomfortable on my face.	Asia	conspiracy	woke	conspiracy	woke	lies	vaccine	Trump	Biden	It's an Asian. They do it in Asia when they are sick.	It's still an Asian thing and now it's become a liberal thing.	1	I use to wear the fashion mask but not wearing one as much I go for the replaceable surgical mask.	2	It's more comfortable and fits my face.	2	I didn't have to keep buying replacements.	1	7	4	4	1	1	1	4	4	4	4	1	1	1	1	1	1	6	1	1	1	1	1	1	1	1	1
1	I was sick and went into the dr's office	I did have some experience	2	I am deciding not do	I do not think they make a huge difference overall - however, if I am in a hospital ER or find myself in a sick waiting room, then yes I will probably wear one just on the off chance that it may protect me	hot	claustrophobic	hidden	fear	stranded	jail	flu	overrated	government	I'd never thought much about it. Thought the people in China who had to wear them all the time were a bit silly. I saw the need for them for medical professionals but not your average person	I see the need if I'm sick and have to be around people - or if I'm in a situation where I'm around a lot of sick people to protect myself.	1	Never knew there was any other kind. This is what was offered before Covid if we came into the dr's office or hospital and we were sick, so that's what I would use.	3	Again, I would only wear this if I was trying to protect myself and the N95 is the only one that can really do this well of the types you've mentioned.	3	They were the only ones that I felt offered any kind of real protection. If the government was going to make me wear one, then I was only going to wear one that at least made some sort of sense in protecting me somewhat.	1	1	5	5	3	2	2	4	2	3	3	1	1	1	5	3	3	3	2	2	2	2	3	3	5	5	2
2	I didn't	No need	2	I won't	Can't breath in a mask	germs	covid	breathing	sick	germs	mask	awful	spreading	mask	I never thought about wearing a mask before COVID	I can't breath in a face mask so I don't usually wear one.	1	This is the only kind that are available at the present	1	The only one readily available	1	This was the one available at the hospital entrance	3	6	5	5	3	3	3	6	6	5	3	1	1	1	6	2	3	3	3	2	3	1	6	2	5	5	1
1	Required at the hospital while visiting a patient.	Not visiting a patient.	2	I may visit a patient again.	no other reason to.	ineffective	useless	bothersone	illness	covid	flu	illness	China	flu	I disliked it, but I knew there was a reason because I was visiting a patient.	I think they're ineffective and not worth wearing.	1	They are inexpensive and provided where I have to wear one.	1	They are inexpensive.	1	it's what most everyone was wearing, and they're inexpensive.	1	3	4	6	2	1	4	4	7	7	2	1	1	2	2	1	1	1	2	2	2	2	2	1	1	1	1
1	Germs, Bacteria	Personal preference	1	Bacteria	Personal preference	China	Wuhan	Corruption	Lies	Hate	Fear	Coercion	Bill Gates	Fauci	Never was a thought before covid	Depends on the situation & how close I will be to people	2	Not so medical	2	Has more personality to it	2	Same reason as above	5	3	5	5	2	4	3	4	2	2	2	2	2	2	7	7	7	7	4	4	3	4	5	5	6	6	6
1	I was a medical professional	Some people did not need to be around contagions	2	Na	Not needed	Paranoia	Contagion	Spread	Sickness	Death	Hospital	Tired	Sick	Over it	It can be useful to protect others	It is useful in some situations	2	Cheaper	2	Price	2	Price	2	7	7	6	3	3	6	5	7	7	2	1	1	2	5	1	1	3	4	4	3	1	3	5	6	6	5
2	NA	NA	2	visiting the hospital	I've already experienced it.	health	disease	vaccine	illness	death	panic	illness	endemic	vaccine	Never crossed my mind.	Useful in high risk areas.	3	preexisting conditions	3	it works better.	3	I wanted something effective.	2	4	4	6	2	4	3	6	6	6	2	1	1	1	5	1	2	2	1	1	1	3	2	2	4	5	1
1	mowing grass or yard work	no need	2	if sicj	not mandated	old	annoying	sick	anger	coughing	horrible	fear	anger	society	I wore a mask just when doing yard work because of my allergies	I will only wear it to keep mold and allergens out of my system while doing yard work.	2	I bought a bunch. I have 3 kids and a husband and they all liked differen ones.	2	I like being able to wash and have a few different options	2	i bought them cheap and just washed them all the time. I could send my kids to school with a few changes	2	6	5	7	2	2	3	7	2	6	2	1	1	2	5	3	5	6	3	2	2	1	2	4	5	5	2
2	didn't	WHY WOULD I	2	don't	It's uncomfortable & not necessary	pandemic	covid	discomfort	scared	death	personal protection	orange	trump	stupidity	Unless I was a doctor in surgery why every would I wear a face mask?	If we get a major recurrence of covid or another disease I will wear a mask, other than that I see no reason to wear a mask	2	What I could buy	2	I prefer to reuse, I actually have one like a hood that goes around my face	2	nobody had surgical or N95 masks around me	2	6	3	7	6	7	7	4	5	6	5	2	1	2	6	7	7	6	3	3	2	1	5	7	6	6	2
2	n/a	I had never felt the need to	2	n/a	I don't really feel it is necessary	sick	germs	protection	scary	die	sick	annoying	sick	dangerous	I had never considered it and didn't believe it was usually necessary.	I will if required or I am sick to protect others, but don't feel the need to as a general rule.	2	They are cheaper in the long run and don't contribute to as much waste.	2	Same as above, the price is good and less waste.	2	I felt it offered enough protection.	2	6	4	7	6	6	3	3	5	5	6	1	3	2	3	1	2	5	2	3	2	2	5	5	6	7	2
2	na	not necessary	2	na	not necessary	protection	uncomfortable	annoying	negative	dangerous	illness	illness	dangerous	annoying	I did not consider wearing a mask because it was not necessary.	The risk of Covid is less so there is no need to wear a face mask.	4	a friend made them for me	4	most comfortable and cost effective because it is reuseable	4	had access because a friend made them for me	2	7	1	6	5	7	7	7	5	5	5	1	1	1	5	1	5	6	2	2	2	2	6	6	6	5	1
1	I was painting the interior of a business.	There appeared to be no need to wear a mask before.	2	I would wear one in the case of another virus outbreak	It's hard for me to breathe with one on and I am claustrophobic	Covid	Virus	Hospital	Covid	Outbreak	Humans	Pandemic	Outbreak	Humans	I didn't think of it much before	I think it can be a good idea to prevent spread of influenza and Covid	2	I could not afford a N95 mask and the single use masks are polluting my city still to this day.	2	They were reasonably priced and reusable.	2	They were reasonably priced and they did the job. I work from home, so i did not need to leave the house much.	3	6	5	6	6	6	6	6	3	3	5	3	3	4	3	6	6	4	3	2	5	5	5	5	5	1	1
2	NA	UNNECESSARY	2	UNNECESSARY	NA	ANNONYANCE	I NEFFECTIVE	MANDATED	CONCERN	COMMON	LIVEABLE	OVER RATED	COMMON	LOW DEATH RATE	NEUTRAL	UNNECESSARY	1	WHEN MANDAted	1	n95 too costly	1	mandated	2	3	3	4	2	2	2	4	3	3	2	2	2	2	2	2	2	2	2	2	2	2	2	2	3	3	2
2	I didn't	Didn't feel the need	2	I don't plan too.	No need.	No more	Overrated	Preference	Question	Safety	Shelter	Planned	Worrisome	Over it	To each their own. If you want to wear one, go for it.	No need, but wear one if you want.	2	Got them free and reusable when forced to wear one.	2	Reuseable	2	Reuseable	2	5	4	4	4	4	5	4	6	4	2	1	1	5	5	2	4	3	2	2	4	2	5	4	5	5	2
1	Employment at a hospital	Not applicable	2	Not applicable.	Don't need to wear one unless I'm sick.	Gross	Constricting	Muffling	disease	panic	fear	coronavirus	respiratory	China	It was something I had to do and I did, despite disliking it immensely.	I don't need to wear one unless I'm sick and that's what I do.	1	Ease of access and convenience.	1	It's the one I have access to at the lowest price.	1	It was what I had access to, through work and at home.	2	4	2	4	4	6	4	4	2	2	2	2	2	2	5	2	2	4	2	2	2	2	2	3	4	4	4
2	Protection	didn't need it	2	I don't need to wear one	don't need one	protection	disguises	cover	Disease	Epedimic	COVID	Epidemic	Disease	Symptoms	I didn't need to wear a face mack before COVID	I have no opinion on wearing a face mask currently	1	Blocks the spread of viruses	1	Protect myself from viruses	2	I like my masks to be different from others	2	5	5	6	6	6	6	6	5	5	6	3	3	4	5	3	3	5	5	5	3	3	5	5	5	3	3
1	When I had to do cleaning.	To prevent myself from inhaling dust or mold.	2	I would only start wearing a mask again if things got very bad.	It feels unnecessary, now that I've had COVID-19 and have been vaccinated 5 times.	Protection	Safety	Sanitary	Viral	Spread	Vaccine	Trial	Past	Annoyance	I didn't have any thoughts on it; it was just something I did when I needed to.	I feel fine about it. I would wear one if necessary.	3	When I did have to go out, I used to wear a N95 type mask, because it offered the best protection for public use.	3	I have tons of them left from pandemic days, so I would just keep using them.	3	Like I wrote previously, they were they offered the best protection, so I used them more than the other kinds.	2	4	1	6	7	7	7	7	6	6	6	3	3	2	5	2	2	3	2	2	2	2	2	2	2	2	2
2	dust	no working environment which needs a mask	2	none	unneeded	Japan	China	South Korea	Black Plague	NWO	Disease	scam	bioweapon	sucks	for work reasons only	for work reasons only	1	keep dust and bacteria out	1	don't need anti-viral	3	anti-viral	2	5	4	4	4	4	3	5	3	5	3	2	2	2	4	4	4	4	2	2	2	2	4	3	3	3	3
2	offering protection from pollution and allergens	not believing that masks are effective or the belief that they are an impingement on their freedoms	1	PROTECT FROM DESEAS	PROTECT FROM DESEAS	COVID-19	PANDAMIC	CORONA VIRUS	COVID-19	PANDAMIC	CORONA VIRUS	CORONA VIRUS	ISOLATION	PANDAMIC	offering protection from pollution and allergens	offering protection from pollution and allergens	4	REUSABLE	4	LESS PRICE AND REUSABLE	4	LESS PRICE AND REUSABLE	7	6	7	7	7	6	6	6	6	7	7	7	7	7	6	6	7	7	1	1	1	1	7	7	7	7	7
1	Safety	Never thought I had to	1	Covid	Democrat talking point	Aggravated	Unnecessary	Democrat talking point	Joke	Farce	Conspiracy	Oboy	Here we go again	Talking points	Aggravated	Aggravated	3	Safety	3	Safety	3	Safety	1	1	7	7	7	3	2	2	4	4	2	3	1	4	5	1	1	2	1	1	1	1	5	5	5	5	5
2	I've never worn one before then.	I was never in a situation where I felt it was necessary.	2	N/A	It's mainly because of social pressures. Around here, most people don't wear masks and are actually sometimes antagonized by those who wear masks, so it's better for me to not wear one so I can blend in.	COVID	respiratory	virus	virus	spread	contagion	death	pandemic	virus	I just never thought about it that much. I generally only saw them worn by doctors and nurses in medical facilities, not out in public.	It doesn't surprise me to see people wearing them in public now. I presume if someone is wearing a mask, they don't want to get sick, either from COVID or from something else, and they also are probably more community-minded than those who don't mask up.	1	It's cheaper.	1	It's cheaper, and it works well enough.	1	It was cheaper, and it seemed to work okay for me.	2	6	1	7	6	6	4	4	6	6	5	2	2	3	3	4	1	4	3	2	3	3	5	4	5	5	4
2	I never worn one before	I was never in a situation where I had to wear one.	2	I am not wearing one. I just do not think they help.	I do not think they help at all.	Democrat	Doctor	Fauci	Fauci	Covid	Lockdown	Lockdown	Fauci	Facemask	Only doctors or nurses wore them.	I do not think there is a need unless you have a weak immune system	4	These were all I could find to wear	4	If I am forced to wear one this is what I wear.	4	These were the only masks I could find.	3	4	3	5	2	3	3	4	5	4	3	2	2	4	5	3	3	5	5	4	4	3	5	4	4	4	3
2	I had not done this	I did not understand scientifically why it was important until COVID	1	I will wear a mask in high-risk areas only	I did fine without masking before COVID and COVID is calming	Health	Safety	Protection	COVID	Virus	Death	Death	Illness	Pandemic	I understood this was practiced in other countries, but did not realize it was to protect others.	I think it makes sense to protect others, but do not agree with people (mostly fringe) who accuse people on not masking for being bigoted or committed to killing marginalized people.	1	They're cheap and easy to wear	1	They're cheap and easy to wear	1	They were the easiest to get once supply chains opened up again	5	6	1	6	5	7	6	7	7	6	7	2	4	2	6	4	5	4	4	4	5	5	4	4	4	4	4
2	I didn't wear one before	That's not the culture in the US to wear face masks pre-COVID.	2	I didn't continue to wear a mask except for at Comic-Con	Once again it's not the culture in the US to wear face masks	warm	hot	stuffy	panic	sickness	death	sickness	clean	at home	I wouldn't have minded wearing a mask before COVID era	Currently I like not getting face acne	1	They protected the best that were available	1	Same reason as above	1	They were the only ones available besides cloth ones for a while.	6	6	6	6	6	6	6	6	4	4	4	4	5	4	6	4	5	5	5	5	5	5	3	5	5	5	5
1	it safe use to	i like face mask	1	it is very safe	i use mask dayily	Protection	Prevention	Respiratory	Contagion	Health crisis	Global impact	safy	pin	safe	don't have personal thoughts or opinions, but I can provide information on the general perspective regarding face masks before the COVID-19 pandemic.	I don't have personal thoughts or feelings as I am a machine learning model created by OpenAI, but I can share the general consensus and guidelines related to wearing face masks as of my last knowledge update in January 2022.	2	i ;like it	2	good its	1	comfortable	5	2	3	2	3	2	2	3	5	2	2	3	2	2	4	2	3	2	2	3	3	3	5	2	3	5	2
2	before covid I never wore a facemask	There was no new disease to worry about	1	Not enough data on the long term effects of covid are known	I will continue to wear my mask	preventative	protection	determinate	spread	everyone	sickness	mutative	embedded	ACE receptor	I didn't care. I wouldn't wear one but thought nothing about other people wearing them.	I wear one inside and when in a crowd. I've read about studies done after pandemics and there is always something that affects anyone who had been exposed years after being sick.	1	They're cheap and I can always have one in my pocket just in case.	1	They're just more practical for me.	1	They were easy to get.	6	6	4	7	7	7	4	6	7	7	7	6	7	7	4	2	2	2	6	6	5	5	2	6	4	1	4
2	protection	safety	2	more comfort	virus protection	prevent to sick	secure to sun tan	affection	safety	health	clean	panic	fear	protection	no	no	3	more than safety	3	easy to carry	2	wear functions	6	6	5	6	5	7	3	6	6	7	6	6	7	6	5	6	6	5	5	6	7	6	6	5	6	6	7
2	I didn't	No need for it	2	Im not	It is not useful	Restrictive	Breathe	Hot	Scam	Rights	Sick	Sick	Headache	Achy	I did not like being forced to wear a mask	I'm not	2	It is Fashionable	2	It is fashionable! Redundant questions	1	Same answers as above	2	5	3	4	4	4	4	4	4	4	4	1	1	1	4	3	4	4	3	3	3	4	4	5	5	4	4
2	I did not wear a face mask before COVID	I did not feel like I needed one.	1	I wear it from time to time if I am in a crowded area.	I don't wear it around familiar people or if I'm only around a few people.	Blue	Trump	Coughing	Sickness	Death	Fighting	Annoying	Long	Terrible	I did not want to wear one because I thought it was stupid.	I don't mind but I still don't think it helps much.	1	It's more comfortable and breathable for me.	1	They're cheap and breathable.	1	I wore both surgical and cloth, but it won't let me select both. I wore the cloth one so I wouldn't have to keep discarding the surgical ones.	2	3	6	6	5	5	5	5	3	3	5	3	3	4	3	3	3	3	5	5	5	3	3	3	3	5	2
2	Not infecting others if I had contracted the illness myself	I had no reason to wear one	2	Less risk of infecting others	If I'm sick I stay at home, therefore I am not going to infect anyone anyway	Safety	Health	Considerate	Hysteria	Illness	Death	death	infection	long term complications	I understood that wearing a mask is to prevent transfer of germs, bacteria, etc. from one person to another	If I was asked to wear one I would. If I am sick or may be concerned abotu making others sick I would wear one.	1	Disposable, single use, same as surgeons wear so as not to infect their patients	1	Cost, single use	4	I wore homemade until we could get our hands on the surgical masks. After that we only wore surgical masks.	7	7	7	7	7	7	7	7	7	7	7	7	7	7	6	6	6	6	2	2	6	2	7	7	7	7	4
2	not applicable	didn't believe they worked	1	stop spread	ineffective	restriction	sickness	breathing	covid	spread	virus	virus	disease	fatigue	didn't use them	they don't work	4	more comfortable	4	comfort/cost	3	most recommended	2	3	3	4	3	5	3	5	2	2	3	3	3	3	3	2	2	3	2	2	2	3	2	3	3	3	3
1	Working with hazardous materials	Didn't see the need	1	Good idea when people are sick	There is no reason	Covid	Coughing	Sick	Covid	19	Illness	Anti Vaxxers	Deniers	Trump	Didn't see the need	It's a good idea during the fall & winter & even spring seasons because of either allergies and colds and flu's	2	Looks nicer	2	Looks nicer	1	More available	2	3	5	4	4	4	4	4	5	5	5	4	4	4	3	3	3	3	2	2	2	2	2	2	2	2	2
2	N/A	I am healthy and did not have a disease I was concerned about spreading.	2	If I did it would simply be because I went into a place that requires one.	I do not have COVID or the flu so I do not have germs I am concerned about spreading.	benefit	prevention	clean	scary	disease	danger	pandemic	risk	global	I did not think about it since it is not a thing people did here and I don't work in a hospital	I would do it if it was required but it does not seem as necessary since people are mostly vaccinated or stay at home when sick	4	it's what I have on hand	4	I can make it myself	4	It was what I had	2	5	4	6	4	4	4	5	5	6	5	3	3	3	3	2	4	3	3	2	2	2	3	5	4	2	1
2	N/A	I guess I just never really felt the need to wear one. I never had anything against masks, I guess I just never had thought about it prior to Covid.	1	I see it as beneficial. I had noticed that, aside from Covid, there were benefits to wearing one when it comes to things like preventing flu, colds, respiratory viruses and things like that so I see it as a good thing.	N/A	Preventative	Protection	Safety	Danger	Disease	Threat	Dangerous	Contagious	Bad	I didn't really have any thoughts about it. Like I said above, it was just something I never considered or thought about because I guess I never really had a reason to do so.	I'm fine with wearing one currently. I'd rather take preventative measures for my own safety and the safety of others around me than risk the alternative. I see it as a win-win.	1	It's what I have the most of from stocking up during the peak of the Covid outbreak and what I had access to. They're comfortable but I'm open to other kinds.	1	As I said above, they're accessible for me and affordable.	1	I wore a surgical mask under a double cloth mask that had a pocket that I put a filter in to give me another layer of protection. As I said above, they were affordable, available and what I was able to acquire during the pandemic.	5	6	4	7	7	7	7	6	6	6	7	6	7	7	5	6	6	6	5	5	5	5	7	7	7	7	4
2	N/a	I didn't think I needed it	1	It protects me from disease	N/a	Safe	Effective	Wise	Horrible	Ongoing	Exhausting	Ongoing	Bad	Severe	I didn't think I ever needed one.	It's still keeping me healthy wearing one	3	It's the best	3	It's more effective	3	It was effective	6	7	6	7	7	7	7	7	5	5	6	7	7	7	7	7	6	7	5	4	4	4	6	5	6	5	4
1	Painting or yardwork	people didn't need one	2	If there is no threat than I wouldn't but would for activities	wouldn't need it	Doctor	hospital	illnesses	travel	illness	coughing	annoying	hurts	long	Would use for art projects with paint	Wear at dr. appointment and hospitals.	1	cheap but I use different styles	1	sanitary, catches large droplets well enough	1	cheap, sanitary, used in most instances	5	6	4	7	5	7	5	4	6	6	5	4	5	6	5	4	7	6	5	5	5	5	5	6	6	6	4
1	was in a hospital setting	N/A	1	Because COVID is still here	N/A	safety	protection	airborne	dangerous	deadly	spread	pandemic	illness	sick	I would only wear them for dangerous occasions	I wear one when Im in crowded areas because COVID and other airborne illnesses are still here	3	This is a mask that is comfortable and helps reduce my chances of getting disease	3	This is a mask that is comfortable and helps reduce my chances of getting disease	3	This is a mask that is comfortable and helps reduce my chances of getting disease	5	7	4	6	7	7	7	4	5	5	7	7	7	7	7	7	7	7	6	6	6	5	7	7	7	7	4
2	protection	safety	2	more comfort	virus protection	prevent to sick	secure to sun tan	affection	safety	health	clean	panic	fear	protection	no	no	1	more than safety	3	easy to carry	2	wear function	6	6	6	5	6	7	3	6	5	7	5	5	5	4	6	6	2	4	2	3	3	2	6	2	3	2	2
2	never did	didn't have a mask	2	only when sick	not sure it helps	disease	virus	sick	lockdowns	virus	sickness	china	virus	illness	Didn't find it necessary	Only when I am sick or around sick people	1	disposable	1	cheaap	1	affordable	4	6	6	6	4	4	4	4	5	3	4	4	4	4	5	4	5	5	5	5	6	5	5	5	5	5	5
2	I did not wear one	I had no reason to.	1	Fear of a variety of illnesses	I am wearing one	Pandemic	Protection	Responsible	Covid	Dangerous	Widespread	Illness	Communicable	Dangerous	I never had a need to wear one	There are so many illnesses out there so wearing a madk is a prudent thing to do	1	Inexpensive and disposable	1	Disposable	3	People said it was more effective	5	6	5	7	5	7	4	2	5	5	6	5	4	6	7	4	3	5	5	4	3	4	5	5	6	6	4
2	NA, did not wear one.	I know about or see widespread applications masking in society.	1	I would wear one while I'm recovering from a cold, flu, COVID, etc.	NA, I do wear one sometimes.	useful	convenient	saving	widespread	traumatizing	prepare	disorganized	contagious	deadly	I thought of them only in the context of a hospital or surgery.	I see them as a useful and ongoing tool for minimizing the spread of viruses like flu, colds, RSV, COVID, etc.	3	I use KN95 masks because they are the most comfortable while also being most effective.	3	Same answer. I use KN95 masks because they are the most comfortable while also being most effective.	3	I wore mostly N95 and KN95 masks during COVID, once they become available, since they are most effective in preventing the spread of COVID. I used cloth masks initially when it was hard to find the better masks.	4	6	4	6	7	7	7	2	6	5	6	6	6	6	4	4	5	6	6	6	6	6	5	5	5	7	4
2	N/A	Unsure	1	There is still a risk of COVID-19.	N/A	sickness	COVID-19	fear	anxiety	fear	hospitals	panic	illness	scary	I would wear a mask to protect myself and others if needed.	I will wear a mask in certain situations.	4	The cotton fabric is most comfortable and I use a filter with them as well.	4	Comfort	4	Comfort	5	6	5	6	5	7	5	6	6	5	6	4	4	5	6	4	5	5	5	5	6	4	5	5	6	6	3
2	Surgical mask	Reduces Exposure to Allergens.	1	reduces the spread of respiratory illnesses within the community by reducing the number of infectious particles that may be inhaled or exhaled	persons with a medical condition, mental health condition, or disability that prevents wearing a face covering	COVID-19	coronavirus	isolation	COVID-19	coronavirus	isolation	coronavirus	isolation	the flu	offering protection from pollution and allergens	The Centers for Disease Control and Prevention (CDC) recommends personal masks in public when hospital admissions from COVID-19 are high	1	availability	4	re-usable	4	its washable and reusable	7	6	6	6	7	7	5	6	6	6	7	7	7	7	6	6	6	7	1	3	3	5	7	7	7	6	7
1	the air quality	none	1	the air quality	none	cover	stink	air	gross	fake	disgusting	fake	FALSE	untrue	I rode a face mask due t the smoke and pollution in the air while riding my bike or exercising.	I will wear a face mask if there is smoke or if I am exercising in an area where there is air pollution.	2	smoke and air quality	2	I wear a regular cloth mask	2	I would wear a regular cloth mask because it was required.	1	4	2	1	4	2	4	6	5	6	4	4	4	4	2	4	3	4	2	1	1	1	2	1	2	1	1
1	safety	protect virus	2	protection	deceases	fear	affected	protection	clean	stay safe	stay lonely	clean	claer	better	more safety	better	3	more safety	3	comfort	2	wear any function	5	2	3	2	2	3	2	2	2	2	3	2	2	3	5	2	2	3	2	2	2	2	5	2	2	3	3
1	glow	friend	1	continue glow	n.a	glow	peel	orange	cough	mask	vaccine	vaccine	world	statitcs	really need much helped me to get rid oof covid.	helped to controlf pollution dust entering in my lungs.	2	i like to convert my needs into to design and color of my favorite.	2	fashion with needs to control the disease is th ebest choice.	1	that the starting time i weard this with no other choice.	4	2	2	3	2	4	2	6	2	3	2	3	2	3	6	2	3	2	2	3	2	2	6	3	2	2	3
2	I didn't wear one.	There didn't seem to be a reason to wear one.	2	I don't intend to wear one.	I don't believe it to be necessary.	China	COVID	Fauci	Scary	Crooked	Power	China	Manufactured	Political	I never really entertained the thought, to be honest.	I think it is a product of a false narrative. There are multiple studies pointing to the facts that face masks don't help with regard to preventing/warding off COVID-19.	1	They are mostly available for free.	1	I don't see a need to obtain a different type of mask.	1	These were widely available at places of business.	4	3	4	3	2	2	4	4	2	2	2	3	2	2	4	3	3	4	5	2	3	4	5	4	5	4	5
2	Required by hospital for visit	Never thought I needed it	1	COVID-19 is still around and I recognize the benefits of wearing a mask	Inconvenience	COVID	Sick	Pandemic	COVID	Isolated	Death	Sickness	Fear	Death	I thought that they were only needed for doctors or those that were sick	They are necessary. They are not just preventing the spread of COVID but also Flu, colds, and RSV	1	They are effective, easy to find, cheap	1	The N95 is very hard to breath with and fashion and homemade masks are not as effective	1	I started to wear homemade and fashion ones, but once the CDC recommended surgical one time masks that is what I chose and they were cheaper	6	6	4	7	7	7	6	4	6	3	7	6	6	7	7	4	7	6	7	7	7	7	7	6	7	7	2
2	N/A	Not necessary	2	N/A	Not mandated	Protection	Sickness	Disposable	Covid	Illness	Death	Pandemic	Virus	Vaccine	Not necessary	Wear one when sick to protect others	1	Required for work in healthcare field	1	Easily disposable	1	Mandated at my workplace	4	6	5	6	5	6	4	5	5	5	6	4	4	6	4	4	4	4	4	4	4	4	5	4	5	5	4
2	N/a	N/a	2	Comfort	Germs	Safe	Breath	Fish	Germ	Unsafe	Death	Germ	Virus	Bacteria	It is safe for the public?	It is safe for the public?	1	Availability	1	Availability	1	Availability	4	3	5	6	3	3	3	5	6	4	3	5	4	4	4	2	3	1	3	1	4	6	5	5	7	7	5
2	I didn't.	Why should I?	2	Why should I?	There's no reason to wear one.	sweltering	itchy	paranoia	paranoia	mask	whiners	virus	injection	mask	I never thought about it.	I don't see the point.	2	I had to pick one. I don't wear a mask.	2	I won't to look fashionable.	2	I only wore one because it was required.	2	2	3	4	2	3	3	6	2	2	2	2	2	2	2	2	2	2	2	2	4	2	2	2	2	2	2
2	I did not	no need	2	I do not	I don't see why I should	protection	hot	bother	disease	contagious	infection	flu	lab	China	I never have because there was no reason to	I don't see any good reason to	1	Cheap and easy to find	4	I don't wear one	1	Cheap and easy to buy	2	4	4	5	4	4	3	4	5	5	4	2	2	2	1	2	2	2	3	2	2	2	2	2	3	3	2
1	preventing	Protects You From Poor Air Quality.	1	face masks help protect against viruses other than COVID-19	not believing that masks are effective or the belief that they are an impingement on their freedoms	droplets	sprays	germs	new disease	influenza virus	coronavirus	virus	mask	spread	Wearing face masks is recommended as part of personal protective equipment and as a public health measure to prevent the spread of coronavirus ... People also ask	that high-quality masks can block particles that are the same size as those carrying the coronavirus.	3	safty	3	safty	3	safty	5	4	6	3	6	7	5	6	5	6	5	6	7	6	5	6	7	5	6	5	6	7	3	2	4	5	6
1	My son attends a specialty clinic where masks are always required.	I did have experience.	1	I don't want to catch the flu or other illnesses and be sick all winter like prior years.	I did decide to wear one.	cumbersome	warm	annoying	painful	anxiety	isolation	sick	cough	home	I had no thought either way, sometimes I had to wear one and so I did.	It can still be helpful for some people and group and should not be tigmatized.	3	I feel like if they are good enough for the professionals, they are good enough for me.	3	I feel that this offer the best level of protection.	3	I was instructed to wear an N95, and I took that advice seriously.	5	6	4	6	6	6	6	6	5	5	6	6	4	6	5	2	6	5	6	6	6	6	6	5	6	6	6
2	To protect self from sickness.	There wasn't a deadly virus or sickness on the loose.	1	I don't want to get sick and different COVID variants keep popping up.	I got the covid shot.	Safe	Clean	Healthy	Sick	Virus	Fear	Sick	Virus	Death	Kind of weird.	Life saving and it helps prevent diseases.	3	This brand mask was proven to work the best.	3	It was safer version of the mask that worked the best.	3	It was safer version of the mask that worked the best.	6	7	2	7	5	7	2	6	5	5	6	5	5	5	6	2	2	2	4	3	3	3	6	5	6	6	2
1	Avoid pollution	Not a habit	1	For health reason	None	Protection	Prevention	Safe	Deadly	Infection	Virus	Virus	Infection	Contact	I want to protect myself from any possible air pollution or virus transmission	I wear it when going out especially when there is a crowd. This is a safest way to protect from air transmission of any possible virus/germs and air pollution from smoke and chemicals.	1	It's safe and easy to wear.	1	Professionaly made is better	3	It's the highest protection	6	7	6	7	6	7	6	7	7	7	7	6	6	6	5	1	4	4	4	4	4	4	7	7	6	7	5
2	I did not	no reason to	1	protect myself and others	bothers face, hurts ears	protection	guard	germs	crisis	bad	illness	pandemic	worldwide	contagious	why wear one	good idea	3	best protection for protecting others and self	3	best protection for protecting others and self	3	I wore a variety until it was tested that N95 were the best ones to wear	7	7	7	7	7	7	7	7	5	5	7	7	7	7	7	4	3	6	7	7	7	7	7	7	7	7	4
2	none	none	1	prevention	none	cover	face	mask	sick	ill	disease	sick	ill	disease	none	prevention	2	comfort	2	comfort	2	comfort	1	1	1	4	4	4	4	4	6	6	6	4	4	4	1	1	1	1	2	2	2	2	1	1	1	1	1
1	I was working in an area (hospital) that required me to wear a face mask due to the possible exposure of certain chemicals.	Because you don't like to wear one; it is uncomfortable to wear all day long at work.	1	I want to make sure I am safe from others who may be carriers of COVID or other contagious diseases.	There is no threat of contracting a disease.	protection	safety	caring	scary	disease	threatening	dangerous	vaccine	isolate	It was uncomfortable to wear; but I was able to take it off when I was done in the lab where I worked.	I hate wearing one; I feel like I can't breathe. However, I know that it will protect me from sickness so I will continue to wear it.	1	They can be thrown away after use. They are inexpensive. You can buy a box of them for very little money. They protect me.	1	Easy to wear. Most comfortable. Inexpensive to purchase.	1	Most accessible in my area. Easy to wear. Cost effective.	7	6	4	6	7	7	6	6	3	2	6	5	7	7	7	2	5	5	3	1	2	2	7	6	5	4	1
2	Not applicable.	No serious infections.	1	I wear mask while traveling on airplane only. I want to avoid illness during travel.	Not applicable.	Disease	illness	protect	virus	bacteria	disease	bad	travel	lockdown	I thought it would feel hot to wear in the summer.	I wear mask when traveling. I do not want to get sick on vacation. I do not need to wear at other times.	1	I have supply of this given to me.	3	Best protection but uncomfortable.	3	Best protection.	4	4	5	2	6	5	5	2	5	6	4	6	5	4	5	3	5	4	5	2	5	4	4	3	2	3	4
1	dust	breathing	2	pointless	pointless	fakke	FALSE	tough	fake	tough	confusing	boring	help	tough	pointless	dont care for it	3	fits better	3	fits better	3	fit better	3	4	4	5	5	4	3	2	4	2	5	2	3	3	4	4	5	5	3	2	2	4	4	5	5	6	4
1	for health reasons	not a problem	2	if infection threat is high	low infection threat	health	protection	safety	disease	death	health	virus	pandemic	safety	only for hospitals	only if necessary	1	cheap, fits well, works	1	cheap	1	available	4	5	5	6	5	6	6	6	6	6	6	4	3	5	6	4	5	6	3	4	3	3	4	3	4	4	5
1	I work in a hospital, so there have been cases where we are concerned with patients having communicable diseases.	I have not done so in private, since I did not think it was a big enough concern.	1	I will wear it more frequently since now I am more sensitive to what impacts not wearing it can have on others.	I still will limit my use and not wear one continuously, since it is somewhat uncomfortable.	Cloth	Hot	Tight	Disease	Death	Isolation	Virus	Threat	China	It seemed a bit unnecessary in most contexts, though I appreciate that in Asian cultures it could symbolize respecting others.	It is definitely appropriate in more contexts, especially if you feel sick.	1	They are relatively cheap and easy to get.	1	It is relatively comfortable and practical.	1	They were relatively widely available.	5	7	3	6	3	4	4	7	5	5	4	4	5	5	5	6	6	5	6	7	3	4	3	5	4	3	2
1	To avoid dust getting into my lungs.	N/A	1	To protect myself from the virus. And others!	N/A	Safety	Protection	Sanitary	Disease	Sick	Apocalypse	Virus	Bad	Avoid	I never really thought about wearing a mask as an adult before the pandemic.	I mask as often as possible when I am out in public. I mask when strangers come into my house. It's vital to protect myself and others.	3	This option offers me the most protection.	3	This option offers me the most protection.	1	The pandemic is still going. I currently wear N95s or KN95s, but earlier in the pandemic I wore surgical masks because they were easy to get and it was thought that they were sufficient. I switched to more functional masks when it came out that surgical masks were not good enough.	7	7	2	6	7	7	7	7	7	7	7	7	7	7	6	7	7	7	6	6	7	5	7	7	7	5	7
2	I have not	I didn't need one	2	i won't	it will not be necessary at that point	safety	breathing	healthy	covid	disease	sickness	virus	China	death	I didnt do it because there was no reason to do it.	I have been vaccinated 6 times so I dont feel the need to do it.	1	its cheap and afffordable	1	easier to breath	1	they were free and easy to obtain	3	5	4	5	4	4	4	5	7	7	7	4	4	4	4	3	4	3	1	1	1	1	4	3	3	3	4
2	safety	ignorance	1	prevention	resistance	protection	hygiene	respiratory	global	health crisis	regional	cornovirus	respiratory	pandemic	irrelevant	necessary	1	i like	1	comfort	1	easy to get	5	6	6	5	6	6	5	6	6	5	6	5	6	6	6	5	6	6	6	5	5	6	6	5	6	6	5
2	N/A	I got flu vaccine annually.	2	N/A	I get Moderna vaccine annually.	protection	health	wellness	death	illness	hospitalization	aggravation	anger	annoyance	I never considered wearing it.	I think it is a good idea if cases are high.	1	It is easier for me to breathe wearing surgical mask.	1	I feel it gives me the best protection with the most comfort.	3	I wanted to be extra protected.	4	5	4	6	4	6	7	6	6	7	6	2	2	1	6	2	2	1	4	2	4	2	4	6	6	7	6
2	I hadn't but I guess illness	never considered	2	I won't	because it's uncomfortable	covid	illnes	hiding	covid	illness	Trump	Illness	Vaccines	debacal	Like I said, I never ghave it any thought	I don't think it's needed unless your immune system is compromised	1	Easiest to get	1	others look uncomfortable	1	It was available	1	4	4	5	4	5	4	4	5	4	4	2	2	2	2	4	5	4	3	3	3	3	2	2	2	2	2
2	Only as part of a Halloween costume	There is no reason to wear a mask before covid-19, there was no precedent set in the state of Florida to wear a mask The only mass I ever saw worn previous to cover the 19 was in Japan when the SARS virus was around	2	One reason I did enjoy wearing a mask is that it covered the dismay that showed on my face about customer service	In Florida it is usually so hot that it is almost unbearable to wear a mask	Covid	Contagious	Protection	Sickness	Hysteria	Quarantine	China	Quarantine	Vaccine	I did not wear a mask prior to covid-19 pandemic, because there was no reason to wear a mask before	I have no problem wearing a mask if there is a lot of covid going on but currently there is not in Florida	2	Because it's my preference and they're reusable and washable	2	I prefer to have a washable mask that is not so expensive	2	The N95 masks are expensive and hard to come by The fashion mass were easy to acquire and easy to take care of	3	5	4	6	5	6	5	6	5	5	6	4	5	5	6	3	4	5	6	5	6	5	6	6	7	7	4
2	none	no need	1	safety	none	covid	flu	infection	scare	death	lockdown	corona	infection	vaccine	necessary	absolutely necessary	2	just for variety	2	just for some color	1	was readily available	4	6	5	7	7	7	7	7	3	2	5	6	6	6	6	4	3	4	3	3	3	3	5	5	5	6	2
2	NA	I never realized that is an import tool of prevention	1	I will wear it when I'm sick to avoid spreading virus	I won't wear it when I'm healthy because I think it's not necessary	germs	sick	prevention	virus	spread	sick	Pandemic	Global	infectious	I though a mask was just for people really fragile	I believe it's import because help prevent diseases	1	they are practical and hygienic	4	They are breathable and economic	1	they are practical and hygienic	2	4	4	6	6	6	5	2	6	6	6	4	4	4	2	4	5	2	4	4	4	4	2	4	2	2	2
2	N/A	wearing face masks in public was not the norm in US culture before COVID-19	2	N/A	No one else is wearing face masks	safety	uncomfortable	protection	illness	death	sickness	virus	spread	sick	I never considered wearing a face mask before the pandemic	I wouldn't want to stand out by wearing one when no one else is	3	N95 is more effective/functional	3	Again, it is supposed to work the best	3	These were the most effective masks available	1	5	1	6	6	7	7	7	5	5	7	4	4	4	6	4	4	4	2	2	2	2	5	4	4	4	4
1	Cutting grass	none	2	I am not	I believe its done.	covid	virus	sick	covid	small pox	shots	virus	sick	china	I didnt unless I was cutting grass	To keep from getting Covid	1	Price	1	Price	1	It was given out every where you went	5	5	5	4	4	4	4	4	5	5	5	3	3	3	5	5	5	5	5	5	5	5	5	5	5	5	5
2	I hadn't	No reason to	2	As long as I feel safe in my surroundings and we aren't in the midst of a big outbreak I won't wear a mask though I keep them handy in my car and at home.	Personal preference	Protection	Pandemic	Prevention	Illness	Emergency	Concern	Virus	Pandemic	Concern	I thought about regions in Asia where I had seen masks worn in public and in medical settings around people with health concerns.	I feel this is a good safety tool considering the health concerns currently.	3	I work for the health department and come in contact with the general public and also am an older adult who has asthma.	3	Best protection and my employer offers them for free	3	My employer provided them and I felt they offered the best coverage.	6	6	5	6	6	6	5	6	7	7	7	5	5	6	6	5	5	6	4	4	4	4	5	5	6	5	4
2	N/A	They were't necessary.	2	N/A	I don't need to.	covid	sick	corona virus	covid	corona virus	sickness	sickness	pandemic	fear	I didn't feel it was ever necessary to wear one.	I don't feel that it is necessary to wear one right now.	4	It's the most comfortable.	4	It looks the nicest and is the most comfortable.	4	They were the most comfortable and breathable.	2	5	5	5	5	5	5	5	4	5	5	3	3	3	5	5	5	5	5	5	5	5	6	6	6	6	6
2	0	NO NEED	1	ONLY IN CROWDED SITUATIONS INDOORS	USUALLY THERE'S NO NEED	CHOICE	SAFETY	GERMS	AWFUL	ISOLATING	SCARY	UNPLEASANT	SICK	CONGESTION	I THOUGHT IT WAS SCARY AND UNNECESSARY AND ODD.	I THINK IT'S FINE IF ONE WILL BE IN A CROWDED SPACE INDOORS AS I AM NOW USED TO THE LOOK FOR ME AND OTHERS.	3	BEST PROTECTION	3	BEST PROTECTION	1	ONLY ONE AVAILABLE THAT COULD HELP	3	5	2	6	5	7	6	4	6	6	6	4	4	4	6	2	2	4	4	4	4	4	3	3	3	3	3
1	When I was sick visiting someone in a hospital, or for fashion	There really weren't many reasons to wear a mask back before Covid, I would only wear one if I was asked to or for fashion	1	If I am sick, I will wear a face mask	If I am healthy, I will not be wearing a face mask	Safe	Contagious	Kindness	Cough	Death	Sickness	Respirator	Breathing issues	hospitalization	I thought they were mostly unnecessary	I feel like they are a smart idea during cold and flu season	1	I tend to use the single use ones because they are more effective than fabric	1	These are the best if you don't have an N95	3	I am a single mom, I wanted to be safe	6	7	6	7	7	7	7	7	5	5	7	7	6	6	7	7	7	7	6	6	6	6	7	7	7	7	7
2	na	Didn't seem necessary	1	To prevent Covid, flu, colds	na	covering	protective	warm	disease	respiratory	horrible	disease	death	continues	Again, did not seem to be necessary	We are just being careful. We do not want covid. had it once, that was enough	3	offers best protection	3	again, best protection	3	best protection	7	7	7	7	7	7	7	7	7	7	7	7	7	7	7	7	7	3	7	7	7	7	7	7	7	7	7
2	N/A	Not necessarily	2	N/A	It’s no longer required	Sick	Flu	Cough	Disease	Virus	Dangerous	Virus	Contagious	Terrible	I don’t think you need it unless you’re sick	If you think you’re in high risk	1	It’s the most breathable	1	I can dispose them after I’m done	1	It’s the most comfortable	2	4	1	5	7	6	7	4	4	4	7	4	4	4	5	1	1	4	1	1	1	1	1	4	7	7	7
1	To avoid getting sick	its summer	1	To avoid getting sick	uncomfortable	safe	cheap	effective	scared	sad	sick	scared	worried	upset	I thought it it made sense and was smart	It's smart .	1	They are cheap	1	They are cheap	1	They are cheap	5	5	6	7	7	7	7	7	6	6	6	6	6	6	6	6	6	6	5	5	5	5	3	3	3	5	4
2	not aware	There was no fear of any disease	1	Now I know Mask Protect with all the viral diseases	not Awareness	covid	flue	Protection	Fear of being sick	viruses	vaccine	Pendamic	fear	Vaccine	Protection	protection	4	Easy to breath	4	Easy to breath	4	Natural Protection	4	4	4	4	4	4	4	4	6	3	6	4	4	4	4	4	4	4	4	4	4	4	4	4	4	4	4
2	N/A	I didn't realize its value to my health	1	It protects me from germs/viruses	N/A	Protection	Socially responsible	Sickness	COVID	Flu	Sickness	Pandemic	Coronavirus	sickness	neutral - I didn't feel negative or positive toward it and didn't really pay much mind to the concept	Positive - I feel positive about the notion and have learned the science behind it. I also know that the health care system in America is trash/expensive so my best way to protect my health is to do preventive care.	3	A respirator mask has higher efficacy and thus protects me.	3	Higher efficacy and the cost is not prohibitive.	3	It protects me the best from others and they do not cost very much.	1	6	4	6	6	7	3	4	7	7	7	6	7	7	1	6	7	7	3	4	5	4	4	4	5	1	4
1	My mom was in the hospital and when visiting her we were told to wear a face mask.	I had experience wearing a face mask before COVID-19.	1	To lower the potential of me getting sick when I'm in public spaces.	If I were not to were a mask it would be because I was lazy, or feel like people would find me wearing one uncomfortable.	protection	string	sickness	disease	panic	stupidity	sad	inside	distance	I had worn dust masks before and thought it was fine. Face masks are not much different, and can help prevent the spread of disease.	I think wearing a face mask is good and can help spread sickness and disease.	1	I had some and it is easy to use. I have N95 masks, but those are uncomfortable on my ears.	2	Looks nice and can be worn more than once.	1	I had use sugical masks and N95 masks. Surgical masks are easy to put on, and don't hurt my ears. The N95 I felt more protected, but the way the strings were designed really hurt my ears, and eventually my nose.	4	4	4	5	5	5	4	4	5	5	5	5	4	5	4	3	4	4	3	3	3	3	5	4	4	5	2
2	n/a	I never thought of it	2	n/a	It irritates my skin	Illness	Constriction	Disease	Death	Isolation	Loneliness	Vaccines	Isolation	Fear	I never thought of it	I will wear one if in a crowded area	2	I like them the most	2	They look better	2	It was the easiest for me to breath in.	4	6	5	6	5	5	5	6	5	5	5	4	4	4	6	4	4	4	4	4	4	4	5	5	5	5	5
2	I have not worn a face mask before COVID-19	I'm healthy, and there was not a mandatory reason to wear a face mask	2	I am not using a face mask after COVID 19	Because I don't frequent crowds that often, and it's now not mandatory	COVID	Sickness	Breathing	Illness	Dire	Pandemonium	Sickness	Death	Lockdown	I never thought about the use of face mask until COVID	I think it's a good way to protect yourself and others from sickness	1	Because it's what I can afford to purchase	3	Because it gives better protection from contracting the COVID virus	1	Because it's what I could afford	1	6	4	6	6	6	4	2	5	4	7	6	6	6	4	4	4	4	4	4	4	4	4	4	4	4	4
2	Not applicable	There was never a need to do so, and it would be socially awkward to do so	2	Not applicable	Preventing the spread of viruses is no longer necessary when vaccines are available	Prudent	Considerate	Cautious	Tragic	Deadly	Disruption	Dangerous	Mutating	Omnipresent	It was only a cultural thing that I never saw in daily life	It is occasionally seen, and I appreciate the concern	2	These are the most easily available	3	These are the most effective	2	These are what I had available	2	2	4	5	4	4	5	6	6	6	5	4	4	4	4	3	4	4	2	2	2	2	3	3	5	5	4
1	I had a cough/cold	to avoid airborne disease	1	to avoid rsv	n/a	safety	concerned	diligent	fear	aprehension	scared	flu	cough	distress	to avoid contaminating others	to avoid getting an airborne disease	3	controlled breathing	3	I have more protection	3	filters the air I breath in	5	6	6	6	6	6	6	6	5	3	6	3	5	4	6	5	5	6	6	6	6	6	6	4	6	6	3
2	protection	never a disaster like it	2	only in crowds	not always a need	protection	safety	smart	mess	disaster	caution	sickness	deaths	sadness	never felt the need	only in large crowds	4	for fashion	4	doesnt look like im a surgeon	4	for the look	4	6	6	7	5	7	6	5	6	5	5	4	4	4	6	3	3	5	4	5	4	4	7	6	6	6	4
2	n/a	didnt feel I needed	1	Protect my mother	n/a	safe	n95	cover	sickness	public	health	disease	virus	contagious	I didn't mind, try to help myself and others	No problems wearing one	3	does proper protection	3	does proper protection	3	does proper protection	5	5	6	6	6	5	6	5	6	6	6	5	5	6	6	5	5	5	5	5	6	6	5	5	5	5	5
2	I was concerned about spreading the virus to others.	I did NOT feel the need to because noone else worn a mask,	1	I am concerned during winter about spreading the virus and also protecting myself from the virus.	I will not wear a mask during the warm weather as I am not worried about virus spread.	virus	protect	hospital	death	illness	isolation	vaccine	elderly	family	I wore a mask to prevent further spread of the virus to others when shopping and also to family members who are older	I will wear a mask in crowds during the winter because I am concered about the flu and other viral infections. During the summer I am not likely to wear a mask because I am vaccinated.	4	I am able to wash my cloth masks and thus sanitize it for use in the future.	4	The cloth masks work well for me and are very cost effective as it can be reused.	4	The masks were comfortable and were effective for me. I think using paper masks create a lot of waste.	5	6	4	6	6	6	6	6	6	6	6	7	7	7	7	5	6	5	4	5	4	4	7	7	7	7	7
2	I didn't	I was never told to do so	1	On public transit and crowded public indoor spaces during the winter.	There is less risk of contracting illness	protection	required	safety	disease	danger	illness	virus	risk	death	I never thought about doing so	I will continue to do so in crowded indoor public spaces during winter	2	Reusable, easy to wash	2	Reusable, easy to wash	2	Reusable, easy to wash	5	6	4	7	7	7	7	7	6	6	7	4	5	4	6	5	6	4	5	5	5	4	6	4	5	3	4
2	na	no reason	1	reduce germs in heavily populated areas like airports	NA	divisive	variety	useful	germs	spread	divisive	divisive	deadly	grief	neutral	neutral. I have no problem with people wearning masks when they feel they are useful, I will do the same.	1	for their single use ability	1	price, efficiency	1	availability	5	7	2	7	7	7	7	7	7	7	7	4	4	4	7	4	7	6	3	3	5	4	6	5	5	6	4
2	n/a	I was not afraid of getting ill.	1	I want to avoid getting ill.	If I am outside in a ventilated area, I am not as nervous.	illness	protection	safety	death	illness	hopitalization	respiratory	ill	coughing	I thought they were for people immuno compromised such as cancer patients	I think if someone may be contagious, they should wear a mask to protect others.	3	If I am flying, I want to be as safe as possible.	3	It is the safest.	3	It offers the most protection	3	6	6	7	6	7	7	7	6	5	7	2	5	6	6	6	7	7	3	5	5	4	6	5	5	4	2
2	n.a.	I did not consider it. I did not work in a hospital setting and I was not around persons considered contagious	1	to avoid getting sick myself, and to avoid getting others sick	n.a.	safety	protection	shield	contagious	disease	sickness	contagious	virus	pandemic	I thought that it was for hospital personnel	It is to keep myself and my family safe from covid-19 and other respiratory diseases	1	it is affordable and it helps protect me from respiratory infections	3	better protection against viruses	3	better 95 percent protection against covid-19	5	7	7	7	7	7	7	7	6	6	7	7	7	7	7	2	2	5	5	5	5	5	5	5	6	6	5
1	Air pollution	No, I wear mask before covid-19	1	protect myself	No, I wear mask after covid	mouth	chin	nose	virus	H1N1	disease	lungs	cold	flu	protect ourself	It is a good habit one	1	use and through	4	washing from cloth	2	attract and design	4	3	6	5	4	3	6	5	5	3	4	6	4	5	5	3	4	6	5	4	6	5	5	3	4	6	5
2	N/a	I didn’t think I had to	1	I’m now nervous about diseases	N/	Protection	Health	Inconvenient	Scary	Death	Fear	Vaccine	Disease	Crown	I didn’t have much reason to think about it besides that is what hospital staff wear	I guess I’m now a lot more concerned about illness	1	I feel safest with that one	1	I feel safest with that one	1	I feel safest with that one	6	6	4	6	6	6	6	7	6	6	7	7	6	6	6	7	6	5	6	6	6	6	6	6	6	6	6
2	NA	didn't see the need	1	protects from COVID and other diseases and I am 66 years old	NA	breathing	protection	benefit	fear	death	loss	dangerous	risky	elderly	never really thought that it was needed in this country	good protection in all situations as I get older	1	better protection and I don't need to be fashionable	1	N95 too expensive	1	easiest to find and afford	6	7	7	7	6	7	7	7	6	6	7	5	6	6	7	6	7	7	7	5	6	4	7	6	7	5	4
1	sinus problem	because cause of covid fear	1	because any time any disaster comes so we aware of this	maintaining for good health	good for health	not identifying my faces	then skin protection	fear	avoid roaming outsite	protect ourself and protect my health	very dangerous	ventilating peoples	big disaster	have sinus problems also have some pollutions.	protect our self and protect to pollution so now wearing mask is better	1	because this good for wearing	1	because this mask rate is normal so used this one	1	beacause this is easy for breathing	4	6	5	5	2	3	1	2	6	5	6	6	6	6	2	6	6	4	2	4	2	2	5	2	2	2	2
1	prevent dust	hide our face	1	prevent dust allergy	unnecessary	protect	covid 19	prevent dust	isolation	transmission	ventilator	quarantine	fatality	spread	Protects Immunocompromised	Keeps me From Spreading Germs	3	N95 offers the highest level of protection. It offers more protection than a medical mask	4	There is mounting evidence to show homemade masks can be highly effective in capturing and containing those droplets, which dramatically reduces the spread of COVID-19.	3	it filters out both large and small particles when the wearer inhales.	6	6	6	6	6	6	6	6	6	6	6	6	6	6	5	5	5	5	3	3	3	3	5	4	6	6	6
2	N/A	There was not need.	2	N/A	There is not need.	hygiene	health	sanizitation	caution	precaution	yield	pandemic	strain	epidemic	I Consider that there was not need.	The need for safety. Amen.	2	The style is My current face mask. Amen.	2	The mask is for the current health purposes. Amen.	2	The decision is based upon what I prefer. Amen.	2	2	2	3	6	6	6	6	7	7	7	7	7	7	1	1	1	1	1	1	1	1	2	2	2	2	2
1	worked in a hospital	when I didn't work in hospital	1	to prevent spread of COVID-19 when sick	When not sick go without mask	breathing	germs	COVID	death	scary	worry	yuck	terrible	horrible	I thought if it helped very sick people I would do it	I thought if it prevents sickness I would do it.	1	easy to find and disposable cheap	1	gets rid of germs	3	I wanted to prevent sickness	6	6	6	6	6	6	6	6	6	6	6	5	5	5	7	7	7	7	4	4	4	4	5	5	5	5	5
2	n.a.	I was never in a really sick and contagious environment.	2	n.a.	There'd have to be a real serious health and safety reason which I don't expect in the near future.	Annoying	Uncomfortable	Pandemic	Covid	lockdown	intubation	death	screening	antibodies	It seems such a flimsy thing that I doubt it is very effective.	It is so unvomfortable. I hate the itchy scratchy feeling on my face.	2	It is slightly less uncomfortable than surgical mask.	2	It doesn't make my face as itchy as others though it still is annoying.	1	It was the cheapest and easiest to get at first.	1	2	2	4	3	4	3	4	5	5	5	4	4	4	1	1	1	1	2	2	3	2	4	3	3	4	2
2	n/a	there was no need to	2	n/a	there is no reason to, COVID is over	stuffy	weird	closed	odd	clean	stress	disease	china	wow	n/a	it seems to be unecessary since we are mostly vaccinated	1	medical grade so it should be safer than most	1	a lot more functional	2	very comfortable than most	2	3	6	3	7	4	1	2	2	5	1	3	7	5	3	1	5	6	5	5	6	2	5	7	4	3	6
2	Didn't feel i need to	Did not need to	2	N/a	Covid is among us, we'll be okay	Covid	Social distancing	Safety	Covid	Shelter at home	Ambulance	Masks	Death	Empty	Didn't feel i need to, almost never saw people wearing masks before	Only if needed, to prevent spread of sickness to others	1	Didn't like the others	1	Dont like the design of the others	1	Wear a regular mask with a rhinestone one over it, for the looks	3	5	4	5	5	5	5	4	4	4	5	4	3	4	5	4	4	5	5	5	5	5	4	4	4	4	4
2	I did not wear one.	I never needed to wear one.	2	I would wear one if I had a cold.	I If I was healthy, there is no need to wear one.	safety	prevention	health	disease	spread	world	virus	airborne	illness	It was for people who had allergies or respiratory problems.	I would wear it if necessary.	4	It was made for me.	4	It is available.	3	The other mask was deemed ineffective.	3	5	4	6	5	5	6	3	5	5	5	5	5	6	4	2	3	4	4	3	5	4	4	3	5	5	4
2	I didn't	We weren't educated to do so	1	To stay safe	It's uncomfortable	safety	sickness	health	sickness	infection	illness	sick	unhealthy	infectious	It didn't really occur to me to do so.	It is good just to prevent any illness	3	I think it works best	1	it is easy and comfortable to wear	1	Its easy to use and works relatively well	5	5	5	6	6	6	6	6	6	6	6	6	6	6	6	6	6	6	5	6	5	5	5	5	5	5	5
2	I had not worn a face mask before COVID-19.	I never needed one.	2	I don't feel it's necessary to wear one now.	I don't feel it's necessary to wear one now.	protection	health	illness	COVID	disease	panic	contagious	powerful	disease	I never did. The need never arose.	I don't plan on wearing one, but I will do it again if I feel I need to in the future.	1	They're easy to find and purchase and they're not expensive.	1	I like the fact that they're single use.	1	Easily available and provide reasonable protection.	3	5	5	6	3	5	5	5	6	6	6	3	3	5	5	3	3	3	3	3	3	3	3	3	3	3	3
2	NA	I didn't see any reason too	1	I will wear a facemask in heavily trafficed areas, like airports, to prevent myself from getting sick	I won't wear a mask all the time, as it is inconvenient to always wear one	Safe	Protection	Simple	Scary	Death	Sickness	Deadly	World-Chaging	Generational	I never gave it much thought, TBH	Its a wise choice to wear a mask when being around many people	1	They are the cheapest and easiest to use	1	They are the cheapest and easiest to use	1	They were the only ones I could regularly get	6	6	2	7	7	7	7	6	5	3	6	5	5	5	7	4	6	5	2	2	2	2	6	4	5	3	3
1	I was sit and still needed to take public transportation	To keep your community from being vulnerable to viruses	1	To protect myself and others.	Discomfort	Stiff	Smelly	Small	Nervous	Contagious	People	Pessimistic	Horrible	Dull	I think wearing a mask is a good practice when sick.	I feel indifferent towards wearing a mask.	2	Wearing this mask allows me to keep using it	2	This type of mask is comfortable compared to the others,	1	Masks were not readily available	7	7	7	7	7	7	7	7	2	2	2	4	4	4	6	6	6	6	6	6	6	6	6	6	6	6	6
2	n/a	no benefit	2	n/a	no benefit	presssure	futile	useless	panic	fright	excited	China	manufactured	secret	I never thought it was provide much benefit and was constricting my breathing	thre are almost no benefits as it does little or nothing to prevent transmission	1	When I wear a mask, it is basically becaise I nam forced to by the places I visit. the surgical mask is the easiest to obtain	1	it is the most comfortable and cheapest	1	it was the cheapest and easiest to find	2	6	4	6	3	3	3	4	2	2	2	3	3	4	5	5	5	5	4	4	4	4	5	5	5	5	5
1	germs	social cues	1	hygiene	social cues	sick	hygiene	health	sick	contagion	illness	contagion	sickness	epidemic	hygiene reasons	hygiene reasons	3	hygiene	3	hygiene	3	hygiene	5	5	5	5	5	5	5	5	5	5	5	5	5	5	5	5	5	5	3	3	3	3	5	5	5	5	5
1	When I was painting my house.	I didn't think I needed it.	1	to not get sick	if I don't need it	protection	facial	covering	Covid	sickness	quarantine	SARS	cough	scentless	To not inhale fumes	To not catch the flu or covid as easily.	2	it is easier to breath in	1	it is disposable.	1	it was disposable	3	3	2	2	2	6	1	7	4	4	6	4	4	4	4	3	5	5	4	4	4	4	4	4	4	4	4
2	I didn't	I didn't have a reason to	1	Depending on air quality	Not major risks for anything	Protection	Barrier	Safety	Outbreak	Excess	Disease	Virus	Respiratory	Contagious	I didn't really see anyone wearing them unless they were in a certain industry or had a certain health condition.	I don't mind it and find it is beneficial for keeping one safe.	3	I find it offers the best protection and it was recommended.	3	I find it to be most effective and purposeful.	3	I found that these masks were the best ones to keep me protected and offered the best defense.	5	6	6	6	6	6	6	6	6	6	6	6	6	6	6	5	6	6	5	5	5	5	5	5	6	6	4
1	Protection while wood working	I had worn a facemask	1	Spikes in Covid 19 rates	I do still wear a facemask in certain situations	Smart	Responsible	Caring	Difficult	Stressful	Test	Test	Unfortunate	Proud	I believe in science, and I believe in government, so I was happy to wear a facemask when called for	Still the responsible thing to do when called for	2	WE found excellent KN95's is multiple colors - almost as effective as N95s	2	Because KN95 facemasks are reasonably effective, but still comfortable	2	Because KN95 facemasks are reasonably effective, but still comfortable	2	6	2	7	7	7	7	7	6	6	6	6	6	6	6	3	5	3	3	5	6	3	2	3	5	5	5
1	pollution	no	1	protect myself	no	nose	chin	mouth	H1N1	virus	disease	lungd	cold	flu	protect our self	good habits	2	attract for design	1	use and through	4	washing from cloth	4	3	6	5	4	6	5	4	5	3	5	5	3	6	4	3	6	5	5	4	6	5	4	6	5	3	4
1	from dust	self hygine	1	immune	none	covid-19	dust	allergy	lockdown	isolate	holidays	disaster	nature	holidays	for my safety precausions	Masks have been an effective tool for preventing the spread of COVID-19 and its variants	1	easy to use	1	one use	1	one time use	4	5	5	6	5	6	6	5	5	4	6	4	5	6	4	5	6	5	4	5	6	6	4	5	6	5	5
1	TO AVOID COVID	NOTHING	2	NOTHING	BECAUSE IT AFFECTS MY CONFIDENCE	SAFETY	IMPORTANT	USEFUL	STRESS	DEPRESSION	LONELY	VIRUS	PANDEMIC	FEVER	I GENERALLY DON'T LIKE TO WEAR MASKS	ITS NOT NECESSARY NOW	3	IT WAS VERY SAFETY THAN OTHER ONES	3	IT WAS REASONABLE	3	EVERYONE KNOWS N95 WAS THE SAFEST ONE	4	5	4	4	6	4	5	5	4	6	5	4	5	5	5	4	5	6	5	4	6	6	3	5	3	4	4
2	I never did.	Never was an issue.	1	in public, a precaution	others are not	cool	liberal	smart	anger	danger	sadness	fear	fatigue	sadness	I only thought about if if someone had a cold	I will wear if if I have to	3	I like the protection	3	safety	3	best protection	6	6	6	6	7	7	7	2	5	5	5	5	5	5	6	3	5	5	4	5	4	4	6	6	6	2	2
1	pollution	no	1	protect myself	no	nose	chin	mouth	disease	H1N1	virus	flu	cold	lungs	protect myself	good habits	1	use and through	2	fashion for design	4	washing and cloth	4	3	5	4	6	4	5	6	5	4	6	5	3	5	4	3	6	5	4	5	4	6	5	4	6	4	5
1	dust allergy	i feel better without wear mask	1	dust allergy	i feel better without wear mask	covid-19	sunlight	vaccination	health	isolation	vaccination	Virus	pandemic	vaccination	irrelevant	necessary	1	i like	1	comfort	1	easy to get	5	6	5	6	5	5	6	5	5	6	5	5	6	6	6	5	5	6	6	5	5	6	5	5	4	5	5
2	I didn't	I never thought about it	2	Unless something else like COVID happens I'm not likely to	if there was another pandemic	protection	shield	protect others	scary	dangerous	isolation	over	vaccines	scary	I never thought about it	I would only wear one to protect myself and others from another severe outbreak	2	It's what I have	3	it's most effective	2	It was what I could afford	4	6	3	6	5	6	5	4	6	6	6	2	4	6	6	2	4	5	3	3	3	3	6	5	5	3	2
2	n/a	n/a	2	n/a	n/a	protection	safety	health	contagious	safety	precaution	deadly	toxic	harmful	i didnt think it was necessary	i think it's fine to wear a mask if you want to take extra precautions	1	most commonly available	1	easy to find	1	easy to find	5	6	2	7	6	7	7	4	6	6	6	5	5	5	7	7	7	5	5	4	5	5	6	6	5	6	6
2	N/A.	No guidance from health services to emphasize the need.	1	Offer some mitigation against illness or sickness for me and my family.	Lowered risky outcomes form exposure.	barrier	disposable	health	stress	concern	safety	coughing	lockdown	risk	It didn't feel necessary.	I will wear them in high risk locations like an airplane but not day to day.	1	Ease of access and disposal	1	See answer for Q8-2	4	Reduced access and felt the N95 and surgical should go to healtcare professionals.	3	6	2	5	6	7	6	3	3	2	5	7	6	6	6	5	6	6	5	7	3	2	3	2	5	6	3
1	Allergies reason	Low Prevalence of Infectious Diseases:	2	Personal Protection	Decreased Risk or Transmission:	Protection	Prevention	Respiratory	Contagion	Outbreak	Global	Coronavirus	Pandemic	Respiratory	In healthcare settings, masks were regularly used by healthcare professionals to prevent the spread of infections or to protect themselves and patients from exposure to pathogens.	Mask-wearing might continue as a gesture of consideration for others' health, especially when individuals are feeling unwell or symptomatic, to prevent the spread of illnesses.	3	These are respirator masks that are designed to fit tightly to the face and filter out at least 95% of airborne particles. They are more effective in filtering out smaller particles and are often used in healthcare and certain high-risk environments.	3	These masks tend to be more expensive than cloth or surgical masks due to their higher filtration efficiency and tighter fit. However, the price can vary, and bulk purchasing might offer better value.	3	These masks are tighter-fitting and are capable of filtering out at least 95% of airborne particles, including very small particles	4	5	4	5	6	7	5	5	6	4	5	6	5	5	5	4	5	5	5	5	5	5	5	4	5	5	4
1	sick	none	1	keep you from spreading germs	none	angry	neutral	sad	isolation	transmission	period	epidemic	pandemic	outbreak	its fashion	none	4	its organic	3	its comfortable	4	its organic	4	6	5	4	5	6	5	4	4	6	5	4	5	5	4	6	5	4	4	5	5	5	4	5	5	4	5
1	Reduces Exposure to Allergens	prevent you from getting sick	1	protect our self	To our health condition	health care	sick	padamic	mask	food	sick	mask	padamic	sick	To safe	To safe	1	Because it is safe	1	Because it is safe	1	Because it is safe	5	5	4	5	5	6	5	5	4	5	5	6	5	5	5	4	5	6	4	4	4	4	4	4	5	5	5
2	in hospital	no concerns of infections	1	Still around, and more virus	Covid and RSV	safe	clean	healthy	infection	spread	sick	spread	fast	sick	In hospital full of patients	just to be safe	1	cheap	1	cheap	1	double masks	5	5	5	5	5	5	5	5	5	5	5	5	5	5	5	5	5	5	5	5	5	5	5	5	5	5	5
1	SAFETY	BE SAFE	1	SAFETY	SAFETY	SAFE	HEALTHY	HAPPY	SAFE	HEALTHY	HAPPY	SAFE	HEALTHY	HAPPY	BIGGEST EXPERIENCE	ITS COVER SCREEN	1	THE DESEASE REMOVE EASILY	1	NO	1	NO	5	7	6	5	6	6	7	6	5	6	6	7	7	6	6	6	5	7	6	7	7	6	3	1	2	2	5
1	Air pollution	no	1	protect myself	no	mouth	nose	chin	H1N1	disease	virus	cold	flu	lungs	protect myself	good habit	1	use and through	2	design	4	washing	4	5	4	6	5	4	5	5	6	4	5	6	4	5	4	3	6	5	5	6	5	5	6	4	5	6	4
2	I didnt	Didn’t feel the need	1	To keep safe	I do sometimes	Constricted	Safe	Effective	Scary	Dangerous	Frightening	Illness	Disease	Harmful	To stay safe	To continue to stay safe	1	They well available	1	Same reason	1	Was recommended	6	7	4	5	6	6	6	4	6	4	4	5	6	5	4	5	4	4	4	3	5	5	6	6	6	6	5
2	None	Because there is no use to wear it	1	For safety	None	Covid	corona	safe	Safety	Deaths	Quarantine	Help	economy	vaccine	None	Safety	1	None	1	None	1	None	6	4	6	5	6	5	2	6	6	4	6	5	6	6	6	4	5	6	5	6	4	2	6	4	5	6	4
1	To clean a dusty attic, and for painting	No reason to do it.	1	If there's a flare up or new diseases in my area.	No need to do it, no threat.	uncomfortable	safe	required	danger	sickness	fear	afraid	pandemic	sickness	Never thought about it, really. No need.	Not really a need at this time but I'm prepared to do so if necessary.	1	It's what I have available to me.	3	More secure and safe, more comfortable.	1	It's what I had and I felt it was useful.	2	7	7	6	6	7	7	7	6	6	6	5	6	6	5	2	6	5	3	3	3	3	5	3	6	6	3
1	Other than preventing or lowering the risk of germ spread, wearing a mask is beneficial in offering protection from pollution and allergens. Here's what else you need to know, including who should wear masks, which masks work best, and how to wear your mask properly.	Protects You From Poor Air Quality. Wearing a mask can protect your respiratory system and general health when there is bad air quality because of pollutants.	1	To protect yourself and others from COVID-19, CDC continues to recommend that you wear the most protective mask you can that fits well and that you will wear consistently. Masks and respirators are effective at reducing transmission of SARS-CoV-2, the virus that causes COVID-19, when worn consistently and correctly.	Disability that precludes wearing a mask. This includes those: For whom a mask could obstruct breathing; Who are unconscious or incapacitated; and. Who are unable to remove a mask without help.	vizard.	visor	veil	influenza virus	influenza virus	influenza virus	coronavirus	coronavirus	coronavirus	Protects You From Poor Air Quality. Wearing a mask can protect your respiratory system and general health when there is bad air quality because of pollutants. ... Reduces Exposure to Allergens.	Other than preventing or lowering the risk of germ spread, wearing a mask is beneficial in offering protection from pollution and allergens.	2	Other than preventing or lowering the risk of germ spread, wearing a mask is beneficial in offering protection from pollution and allergens.	1	Other than preventing or lowering the risk of germ spread, wearing a mask is beneficial in offering protection from pollution and allergens.	1	Other than preventing or lowering the risk of germ spread, wearing a mask is beneficial in offering protection from pollution and allergens.	5	3	3	6	3	5	5	4	6	2	3	5	4	5	5	3	2	3	3	3	4	4	5	3	2	3	3
2	Save from dust	new wear mask	1	safety	save from dusts	protection	hygiene	respiratory	global	health crisis	outbreak	virus	respiratory	pandemic	preventive	necessary	2	i like	1	comfort	3	necessary	5	6	5	6	7	6	7	6	7	6	7	6	7	6	5	6	7	6	6	5	6	5	6	5	6	5	6
1	Going outside	Rarely usage	1	Protect body	Back to normal life	Usage pandemic time	Protect jems	Helps to body	Come to mind covid-19	It is a dough situation	Protect our self	Dough time	All time pandemic	Fight to covid-19	Face mask helps to avoid jems	It is safe for all situation	3	It is safe for us	4	Easy to by all	3	Avoid covid-19	6	6	7	6	5	6	3	6	6	7	6	6	7	6	6	7	7	6	6	7	7	6	6	5	6	7	6
1	Do keep from breathing in dirt when doing the yard work.	None	1	To help prevent spreading sickness	None	Protection	Helpful	Deterent	Disease	Outbreak	Health	Coronavirus	Respiratory	Pandemic	I didn't care about it. I wore it when I had too.	I still don't care about it. People are entitled to their own opinions.	1	Breathability, cheap. effective	1	Breathability, cheap. effective	1	Breathability, cheap. effective	2	6	4	6	6	6	6	6	6	6	6	6	6	6	6	6	6	6	5	5	5	5	6	6	6	6	6
2	NA	Didn't think it was necessary	1	Prevent sickness dfrom spreading	I will continue to wear a mask	safety	health	protection	health risk	widespread	scary	virus	sick	depressing	I thought people looked silly in them, but now I see how important they are	I am glad to wear a mask if I or someone else I know is not feeling well	2	These masks are stylish and washable	2	stylish and sustainable	1	I wore surgical masks at first and moved on to more sustainable fashion masks once they got more popular	4	6	4	6	6	6	6	5	4	3	5	5	6	6	6	5	5	4	4	4	4	4	5	5	6	6	4
1	cleaning the attic	I did wear one for the reason above	1	flu season	I will wear it	protection	virus	helpful	scary	deadly	unsafe	deadly	scary	virus	only for cleaning	to protect against virus	2	I use it because it's affordable and it works	2	affordable, works,looks ok.	2	affordable and works	6	6	6	6	6	6	6	5	5	5	5	4	4	5	6	6	6	6	3	3	3	3	6	6	6	6	6
2	none	I did not feel I was threatened to catch something.	1	I think wearing a mask will help me avoid cathing the flu, and catching colds.	none	prevention	safety	protection	deadly	suffering	global	contagious	infection	lethal	I did not think I was at a high risk, to catch something deadly, so I never wore a mask.	I think it is a good idea, since I am older, and I am now at higher risk, for catching viruses, and dying.	1	Surgical masks are the easiest to find, in the stores.	1	They are readily available, and they fit my face.	1	These masks were given out free, at my doctor's office.	6	7	7	7	7	7	7	7	5	5	7	6	7	7	7	4	6	6	5	2	3	3	7	6	7	7	6
1	because of pollution	none	1	for our safety	none	safety	flexible	comfortable	lockdown	covid	hospitalized	Dangerous	Lockdown	Mask	It's very important to wear mask for our own safety	For our own safety after covid	1	I use only in outsides	1	Use and throw	3	Doctor prescribed	5	4	5	6	5	4	5	6	5	6	5	4	5	6	4	5	6	5	6	5	4	5	6	5	4	5	6
1	working in dusty conditions	Not needed	1	To protect myself as needed	Not needed	chafing	hot	humid	locked	chained	sick	vaccine	flu	counghing	I dreaded having to do it.	I avoid it unless I deem it necessary.	3	Bought in bulk and they are effective	3	No cleaning required/disposable	3	No cleaning required/disposable	2	2	2	6	6	6	6	6	5	5	6	3	5	5	3	2	2	2	4	2	5	4	5	2	5	5	2
1	During construction projects	none	2	none	If the virus is over then not needed.	protection	hot	uncomfortable	fear	death	pain	china	pandemic	fear	Not a problem for dust construction.	it is not needed now.	1	covid	4	breathable	1	safety	6	7	6	6	7	7	6	5	5	6	7	3	4	6	6	5	6	5	3	4	2	3	6	5	5	6	6
2	i did not wear one before	I just did not think it was necessary	1	I have learned how contagious other people are and I do not want to get sick and die	n/a	safety	covid	contagious	death	contagious	sick	death	ill	hospital	I did not think much about it. I did not see a reason to wear one. I would watch videos of China before covid and I would see peopole wearing masks and thought they were being paranoid	I am all for wearing a mask to prevent contagious diseases from spreading or contracting them. I feel they are necessary	2	I find it to be more affordable	2	I like the designs on them	2	These were affordable and I found a hard time finding surgical or N95 masks	6	6	6	6	6	6	6	6	6	5	6	6	6	6	6	5	5	6	6	6	6	6	6	6	6	6	4
1	I was doing some housework in a dusty room.	N/A	2	I will wear one only if there is an increase in the risk of infection.	If there is not a recommendation by health officials I would rather not wear one.	protection	hard-to-breathe	blue	Widespread	Naysayers	Vaccination	Hospital	Breathing-tube	Danger	I thought it was strange that so many people in Asia wore them. I did not appreciate the need.	I will gladly wear one if it is necessary to protect myself.	1	They are the least expensive and easier to breathe through.	1	They are relatively cheap and you can simply wear a new one from the box if your current one gets soiled or damaged.	1	They were easier to obtain, especially at the beginning of the event due to the prioritization for health care workers to receive the more effective N95s.	3	6	4	7	6	7	7	6	6	6	7	6	6	6	6	7	7	6	4	4	5	4	7	7	7	6	4
1	to visit others in hospital	no need to use one	1	to protect self and others	no need to use one	health	safety	protection	disease	virus	infection	virus	illness	pandemic	I did not think about it much	I think I should follow the advice given by organizations like the AMA, CDC and WHO. I would listen to the experts.	3	I believe N95 styles offer more protection	3	I want the most protection possible	3	Experts said that N95 styles were the most effective	5	6	4	6	5	5	5	2	5	5	5	6	6	6	6	5	5	5	5	5	5	5	5	5	5	5	5
2	I didn't	I didn't think I needed it.	2	I don't	I don't think I need to	protective	safe	sick	sick	contagious	hurtful	over	sad	difficult	I didnt even think about wearing one	I don't think its necessary to do.	2	I think it looks the best and is just as effective	2	I think it looks the best and is just as effective	2	I think it looks the best and is just as effective	5	7	5	6	5	5	6	7	5	4	6	5	4	6	5	6	5	6	5	5	6	6	6	5	5	6	5
2	Protects Immunocompromised	Mental health condition	1	Prevents You From Getting Sick	A medical condition.	cloak	disguise	true nature	flu	endemic virus	vaccine	cold	flu	pneumonia	Other than preventing or lowering the risk of germ spread, wearing a mask is beneficial in offering protection from pollution and allergens	good for heath	1	good to health	4	easy to easy	3	prevent to disease	6	6	4	4	4	6	6	6	6	5	4	4	4	4	6	6	5	4	6	6	6	6	5	6	6	6	6
1	For avoiding disease	Because we do not lknow that this like disease should be coming	1	For my safety	Because i maintained social distance with everyone	safety	disease	itching	spread	speed	outbreak	dangerous	afraid	kills	Other than preventing or lowering the risk of germ spread, wearing a mask is beneficial in offering protection from pollution and allergens. i think this is the reason	For my own safety and my surrounding neighbor safety	3	It is the latest and protective mask nowadays	3	Its very protective	1	because that days i do not know about the other masks	5	6	5	4	5	6	5	6	5	6	5	5	5	6	5	6	5	6	6	5	5	5	5	6	4	5	5
2	To protect myself.	I did not need it.	1	I want to protect myself.	N(A	Health	Safety	Germs	death	illness	loss	Pandemic	Death	Illness	I wanted to keep myyself from germs.	It improves my health.	3	It has high protective power.	3	It works.	3	I was available and cheap.	5	4	4	5	4	4	5	4	5	4	5	5	5	4	5	5	4	4	5	5	5	4	5	5	5	4	4
1	Protects You From Poor Air Quality. Wearing a mask can protect your respiratory system and general health when there is bad air quality because of pollutants. ... Reduces Exposure to Allergens. ... Prevents You From Getting Sick. ... Protects Immunocompromised. ... Keeps You From Spreading Germs.	A medical condition, Mental health condition, or. Disability that precludes wearing a mask. This includes those: For whom a mask could obstruct breathing; Who are unconscious or incapacitated; and. Who are unable to remove a mask without help.	1	A medical condition, Mental health condition, or. Disability that precludes wearing a mask. This includes those: For whom a mask could obstruct breathing; Who are unconscious or incapacitated; and. Who are unable to remove a mask without help.	A medical condition, Mental health condition, or. Disability that precludes wearing a mask. This includes those: For whom a mask could obstruct breathing; Who are unconscious or incapacitated; and. Who are unable to remove a mask without help.	Reduces Exposure to Allergens	Prevents You From Getting Sick	Protects Immunocompromised	A disease outbreak is endemic when it is consistently present but limited to a particular region	A pandemic is like an epidemic but even more widespread over several countries or continents.	Pandemic	mental health disorders, including anxiety and depression, can worsen.	COVID-19 may attack more than your lungs and respiratory system.	gan damage affecting the heart, kidneys, skin and brain	Other than preventing or lowering the risk of germ spread, wearing a mask is beneficial in offering protection from pollution and allergens. Here's what else you need to know, including who should wear masks, which masks work best, and how to wear your mask properly	Masks have been an effective tool for preventing the spread of COVID-19 and its variants	3	Only N95 masks are approved for healthcare use in the U.S. KN95 masks have many of the same protective properties. CDC recommends that people be cautious about purchasing KN95 in the U.S. because many are fake and do not meet NIOSH requirements.	3	Only N95 masks are approved for healthcare use in the U.S. KN95 masks have many of the same protective properties. CDC recommends that people be cautious about purchasing KN95 in the U.S. because many are fake and do not meet NIOSH requirements.	3	Only N95 masks are approved for healthcare use in the U.S. KN95 masks have many of the same protective properties. CDC recommends that people be cautious about purchasing KN95 in the U.S. because many are fake and do not meet NIOSH requirements.	6	5	4	5	6	5	4	5	6	5	5	6	5	6	6	5	4	5	6	5	4	5	6	5	4	4	5
1	Reduces Exposure to Allergens	Prevents You From Getting Sick	2	Protects Immunocompromised	Keeps You From Spreading Germs	breathing issue	healthy	fear	isolation	community spread	transmission	cold	pneumonia	lungs	Other than preventing or lowering the risk of germ spread, wearing a mask is beneficial in offering protection from pollution and allergens. Here's what else you need to know, including who should wear masks, which masks work best, and how to wear your mask properly	Masks have been an effective tool for preventing the spread of COVID-19 and its variants	3	save our life	3	save our life	3	save our life	5	6	5	6	5	6	5	6	5	6	5	5	6	5	5	6	5	6	6	5	5	6	5	6	5	6	5
1	fever	cold	1	cold	ache	fever	cold	ache	ache	fever	cold	cold	ache	fever	fever	covid	1	hospital	2	designer	3	covid	6	5	4	5	6	5	4	5	5	6	5	5	6	5	5	4	5	6	5	6	5	6	6	5	6	5	5
1	Did not wear fasce mask before COVID	COVID was not prevalent	2	Not planning to unless current or future strain of COVID causes pandemic-like conditions	No more pandemic conditions	COVID	health	quarantine	COVID	facemask	health	facemask	sickness	hospitalization	Only wore if customary	Not necessary	4	Wife was able to make them	4	Washable and wife made several	4	Masks were hard to come by at first and we started getting to wearing the homemade masks	3	6	3	6	6	6	6	5	5	5	5	3	4	3	5	3	5	5	2	2	2	2	5	5	5	5	2
2	I didn't.	There was never a reason to wear one before.	1	To avoid sickness, also easier to get ready	If I'm going somewhere that is presumed safe.	health	safety	pandemic	covid	2019	scary	rough	sick	unnerving	I had no thoughts on it.	I think we are at a safe point where we can choose whether or not to wear one. I continue to wear one when going out to certain places to avoid even more than just COVID. People got less sick in general from other thing while we all wore masks.	1	They are the easiest.	2	I like buying different styles.	3	These were the safest to use.	4	7	2	7	7	7	7	7	6	6	6	5	5	6	7	6	4	7	4	4	4	4	5	5	6	6	6
2	did not	I had no valid reason to wear a mask.	2	If I wear one, it will be to prevent myself from getting sick.	I have no reason to think that a mask would do me any good under normal circumstances.	Covid	prevention	restriction	fear	sickness	lasting	sickness	death	prevention	I did not see any reason to wear a mask.	I will wear one if I feel it is necessary.	3	N95 is supposed to be the most effective.	2	It does some good and still looks better than other masks.	3	They were the most effective.	3	6	4	6	6	6	6	6	3	3	6	5	6	7	5	4	3	5	5	5	5	5	6	4	5	6	3
1	Reduces Exposure to Allergens.	Prevents You From Getting Sick.	1	Protects You From Poor Air Quality. Wearing a mask can protect your respiratory system and general health when there is bad air quality because of pollutants. ...	Protects Immunocompromised. ...	protect	save	healthy	protect	save	healthy	healthy	save	protect	Refine skin pores: Facial masks achieve cleaner skin and more refined pores. ..	Refine skin pores: Facial masks achieve cleaner skin and more refined pores. ..	1	protect	1	safe	1	safe	4	4	4	4	5	4	4	4	4	4	5	4	5	5	4	4	5	4	5	5	5	5	4	4	4	4	4
1	cold	none	1	injection	none	n95	none	none	scary pandemic fear	none	none	lockdown	cold	vacation	cold	disease	3	its a good	3	used for healthy	2	good	6	5	5	4	5	6	4	5	5	6	4	5	6	4	6	4	5	6	6	5	6	4	6	4	5	6	4
1	mask	mask	1	mask	mask	good	safe	product	good	safe	product	good	safe	product	mask	mask	2	good	2	good	2	good	5	5	5	6	6	6	6	6	5	5	6	6	6	6	5	5	6	6	6	6	6	6	5	5	5	6	6
2	no	It was culturally weird. I didnt even think of it	1	when im sick to protect others. also to protect myself	no	care	health	caring	scary	bad	horrible	bad	lifechanging	awful	I didnt even think of it back then	It is perfectly normal	3	It seems fair	3	protects more	3	It is still good	4	4	3	3	6	6	5	3	5	6	4	5	5	6	6	6	4	4	7	5	5	6	6	7	5	5	6
1	Other than preventing or lowering the risk of germ spread, wearing a mask is beneficial in offering protection from pollution and allergens.	not believing that masks are effective or the belief that they are an impingement on their freedoms.	1	reduces the spread of respiratory illnesses within the community by reducing the number of infectious particles that may be inhaled or exhaled.	The Centers for Disease Control and Prevention (CDC) recommends personal masks in public when hospital admissions from COVID-19 are high.	polution	safety	skincare	fear	safety	health	virus	financial	vaccine	offering protection from pollution and allergens.	that high-quality masks can block particles that are the same size as those carrying the coronavirus.	3	this mask helps to pandemic situation	3	safety	3	covid fear	5	6	5	4	5	5	6	5	5	6	5	5	5	6	5	6	5	4	5	6	5	5	5	6	5	6	5
1	Protect your health.	No	1	Protect my health.	No	cloak.	disguise.	hiding.	Virus.	Disease.	Infection.	It can be very contagious and spreads quickly.	Over one million people have died from COVID-19 in the United States.	COVID-19 may attack more than your lungs and respiratory system.	Nothing.	Protect my self.	2	Protect your health.	4	It is natural fabrics.	3	the highest level of protection.	5	4	5	6	5	4	5	6	5	4	5	5	6	5	5	4	5	5	4	5	5	6	5	6	5	6	5
2	Other than preventing or lowering the risk of germ spread, wearing a mask is beneficial in offering protection from pollution and allergens.	Disability that precludes wearing a mask. This includes those: For whom a mask could obstruct breathing.	1	Reduces Exposure to Allergens	Mental health condition, A medical condition.	breathing	oxygen	good for patient	community spread	isolation	fatality rate	pneumonia	cold	flu	Here's what else you need to know, including who should wear masks, which masks work best, and how to wear your mask properly.	good for health	4	its so comfortable	1	easy to use	3	its prevent the disease	6	6	5	5	4	5	6	4	6	4	4	6	6	6	6	5	5	4	6	6	5	5	6	6	6	6	5
1	Occupational safety:	Respiratory infections such as influenza or the common cold were generally not severe enough to necessitate the use of masks for the general public. Face masks were primarily worn by healthcare professionals or individuals with compromised immune systems.	1	my decision to continue wearing a face mask after COVID-19 would be to take additional precautions and minimize the risk of contracting and spreading respiratory illnesses in general, not just COVID-19. Wearing a mask can help protect not only myself but also others around me, especially in crowded or high-risk environments. It has become a habit and a proactive measure that promotes public healt…	Ultimately, it is essential for individuals to follow the guidance provided by health authorities and make informed decisions based on the prevailing circumstances in their area.	Protection	pandemic	breathing	Disease	Outbreak	Contagion	Pandemic	lockdown	vaccine	Before the pandemic, the use of face masks in many countries was not as prevalent or commonly accepted as it became later. In most Western countries, face masks were primarily associated with healthcare settings, such as hospitals, and their use was limited to certain professions or specific situations like protecting against dust or pollutants.	While wearing a face mask is not a foolproof measure, it can contribute to preventing respiratory droplets containing the virus from being released into the air. This is especially important in situations where physical distancing is challenging, such as in crowded indoor environments or public transportation. Some studies suggest that masks can be effective in reducing transmission, particularly…	3	Protection against airborne particles: N95 masks are designed to filter out at least 95% of airborne particles, including small respiratory droplets that may contain infectious agents. This makes them highly effective in protecting against respiratory diseases, including COVID-19. 2. Personal protection: Wearing an N95 mask can help prevent the wearer's respiratory droplets from being released in…	3	Protection against airborne particles: N95 masks are designed to filter out at least 95% of airborne particles, including small respiratory droplets that may contain infectious agents. This makes them highly effective in protecting against respiratory diseases, including COVID-19. 2. Personal protection: Wearing an N95 mask can help prevent the wearer's respiratory droplets from being released in…	3	Protection against airborne particles: N95 masks are designed to filter out at least 95% of airborne particles, including small respiratory droplets that may contain infectious agents. This makes them highly effective in protecting against respiratory diseases, including COVID-19. 2. Personal protection: Wearing an N95 mask can help prevent the wearer's respiratory droplets from being released in…	5	6	6	7	6	5	6	7	5	6	5	5	6	7	4	5	6	7	5	6	7	6	4	5	6	7	5
1	pollution and allergens	good experience	1	reduces the spread of respiratory illnesses within the community by reducing the number of infectious particles that may be inhaled or exhaled	not beliving that mask effactive	procted face	cantact with droplets	sprays that may contain germs	like an epidemic but even more widespread over several countries or continents	Most of the diseases posing the greatest risks to humans are contagious meaning that they are caused by an infectious agent and can be spread from person to person.	Water, sanitation, food and air quality are vital elements in the transmission of communicable diseases and in the spread of diseases prone to cause epidemics	It can be very contagious and spreads quickly.	COVID-19 may attack more than your lungs and respiratory system.	COVID-19 most often causes respiratory symptoms that can feel much like a cold, the flu, or pneumonia	Other than preventing or lowering the risk of germ spread, wearing a mask is beneficial in offering protection from pollution and allergens. Here's what else you need to know, including who should wear masks, which masks work best, and how to wear your mask properly.	Here's what else you need to know, including who should wear masks, which masks work best, and how to wear your mask properly.	2	good	3	good	1	nice	5	6	5	4	6	5	6	5	5	4	6	5	6	5	5	6	4	5	6	5	6	7	5	6	7	5	4
1	fever	not	1	for protect our health	not	protect health from bad air	protect face	protect mouth	world wide	spread	people	fever	cough	lockdown	protect our health from microorganisms	protect mouth and nose from unnecessary air	1	more easy to wear	3	more protective	3	more prefer from WHO	6	6	5	6	6	7	6	6	5	6	5	5	6	6	6	5	5	5	6	6	5	5	6	5	6	5	6
1	MASK	SAFE	1	safe	safe	good	safe	mask	good	safe	mask	good	safe	mask	mask	mask	2	mask	2	mask	2	mask	5	5	5	6	6	6	6	6	5	6	5	5	6	6	5	5	5	6	6	6	6	6	5	5	5	5	6
2	n/a	no viruses around that were very contageous	1	safety to keep from getting covid	only if alone and not around others	safety	uncomfortable	necessaary	scary	dangerous	frightening	frightening	dangerous	contageous	I never thought about it before the pandemic	I will because I have three pets to care for and cannot risk getting covid	2	These are more comfortable	1	These are rated more safe and reliable	1	these were recommended	3	7	7	7	7	7	7	7	6	6	7	7	7	7	7	7	7	7	5	5	5	5	7	7	7	7	7
1	Protection against infectious diseases: in certain professions, such as healthcare or research, some people wear face masks to prevent the spread of infectious diseases.	The key reason for people with no prior experience wearing face masks before COVID-19 is that face masks were not widely recommended or required in most public settings as a preventative measure against respiratory illnesses. While some individuals may have worn face masks for specific reasons, such as protection against air pollution, dust, or allergens, or for cultural or religious reasons, the…	1	The key reason for people's decision to continue wearing face masks after the COVID-19 pandemic is the ongoing threat of respiratory diseases and the potential for future pandemics. While the spread of COVID-19 has decreased in many areas due to vaccination and other mitigation measures, respiratory illnesses such as the flu, RSV, and other viruses continue to circulate. Wearing a face mask can h…	The key reason for people's decision not to continue wearing a face mask after COVID-19 is a combination of factors, including personal preference, perceived risk, and fatigue with the measures taken during the pandemic. Some individuals may feel that the risk of contracting respiratory illnesses is low enough that they no longer need to wear a face mask in most situations. Others may be tired of…	Protection	Convenience	Adaptability	Uncertainty	Global impact	Adaptability	Pandemic	Uncertainty	Vaccine	Before the COVID-19 pandemic, my understanding of wearing a face mask was primarily related to protecting oneself from airborne particles, such as dust or pollution, in certain occupational settings or during wildfires. I was not aware of the potential for face masks to prevent the spread of infectious diseases, as this was not a common practice in most parts of the world at that time. However, I…	I understand that wearing a face mask can be uncomfortable or inconvenient, but I believe that the benefits of reducing the spread of COVID-19 outweigh these drawbacks. I also recognize that wearing a face mask is a small but important part of a larger strategy to control the pandemic, which includes measures such as hand washing, avoiding crowded places, and staying home when feeling unwell. In …	1	Surgical masks are designed to prevent the spread of large droplets and splashes that may contain infectious particles. They can also help to filter out some smaller particles, although they are not as effective as respirators or N95 masks at filtering out very small particles.	1	Surgical masks are generally more comfortable to wear than respirators or N95 masks because they have a loose fit and do not require a tight seal around the face. This can make them more practical for extended wear or in situations where physical activity is involved.	1	Surgical masks are widely available and can be easily obtained from pharmacies, grocery stores, and online retailers. This makes them a practical and accessible option for many people.	6	7	7	6	6	6	7	7	6	7	6	7	7	6	6	7	7	6	6	6	7	7	6	7	7	6	6
2	Prevents You From Getting Sick	Protects Immunocompromised	1	Keeps You From Spreading Germ	Some patients may express a medical reason for refusing to wear a mask	metal for the face	worn in football	hockey	community spread	transmission	asymptomatic	Wuhan	China	infection	Masks are an important way for people – especially higher-risk individuals – to lower their exposure (contact) to respirato viruses such as COVID-19	Other than preventing or lowering the risk of germ spread	2	N/A	3	N/A	4	N/A	4	5	4	6	5	4	6	7	5	6	7	6	5	6	5	6	7	6	5	6	7	6	5	5	6	7	6
1	I was a CNA, and I was sick.	n/a	1	If someone I know (family, friend, coworker, patient, and/or I get COVID-19 or another disease/illness requiring use of face mask or I get sick and have to go to work anyway, then I will wear a face mask.	n/a	safety	health	sanitation	dangerous	contagious	quick-spreading	deadly	complex	life-sucking	If it's necessary, I will do it.	Wearing a face mask has many benefits to others and myself.	1	I mainly wear a surgical mask (single-use face mask) because that's what is available in my organization, at the store, and in bulk.	4	I have made quite a few face masks with natural fabrics because it was cheaper and more personalizable than a surgical face mask.	1	I mainly wore a surgical mask (single-use face mask) because that's what was available in my organization, at the store, and in bulk.	6	6	4	7	7	7	7	1	7	7	7	7	7	7	7	7	7	7	6	6	6	6	7	7	7	7	7
1	dust	not having to before covid no sickness	1	To keep myself and others safe	there is no virus	fear	closeness	safe	sick	death	family	sickness	mask	swab	I would wear it when in dust or working in hay it would keep it out of my lungs	I wear it now to keep my self healthy and avolding others that are sick	3	It protects me more	3	It is made better	3	I had them in stock so I used them	7	7	7	7	7	7	6	7	7	7	7	7	7	7	7	7	7	7	5	5	5	6	7	7	7	7	5
2	NONE	NO NEED TO WEAR A FACE MASK, AND IT ALSO PROVIDES UNCOMFORTABLE RESULTS	1	TO AVOID VIRUS DISTRIBUTION AND BE SAFE FROM DISEASE	NONE	SAFETY	COVID-19	SPREADING	COVID-19	DEATH	ILLNESS	FEAR	CONTROLED	MASK	NO NEED TO WEAR A FACE MASK, AND IT ALSO PROVIDES UNCOMFORTABLE RESULTS	TO AVOID VIRUS DISTRIBUTION AND BE SAFE FROM DISEASE	4	IT IS COMFORTABLE TO WEAR AND EASY TO MAINTAIN. IT DOES NOT HARM THE SKIN AND IS HANDLE FREE.	4	IT IS AVAILABLE AT A REASONABLE PRICE.	3	IS MORE PRODUCT WHEN COMPARED TO OTHERS	6	7	6	6	7	7	7	7	7	7	7	7	7	7	6	6	6	7	2	2	1	4	6	6	6	6	4
1	Protects You From Poor Air Quality. Wearing a mask can protect your respiratory system and general health when there is bad air quality because of pollutants. ... Reduces Exposure to Allergens. ... Prevents You From Getting Sick. ... Protects Immunocompromised. ... Keeps You From Spreading Germs.	A medical condition, Mental health condition, or. Disability that precludes wearing a mask. This includes those: For whom a mask could obstruct breathing; Who are unconscious or incapacitated; and. Who are unable to remove a mask without help.	1	reduces the spread of respiratory illnesses within the community by reducing the number of infectious particles that may be inhaled or exhaled.	Taylor and Asmundson collated data on the reasons that people cite for not wearing masks, such as not believing that masks are effective or the belief that they are an impingement on their freedoms.	The Outset Purifying Blue Clay Mask	clear out pores	kaolin clay	COVID-19 to a pandemic	A PANDEMIC is an epidemic that's spread over multiple countries or continents.	Bubonic plague	It can be very contagious and spreads quickly.	million people	Heart problems	o lower their exposure (contact) to respiratory viruses	offering protection from pollution and allergens.	1	Besan and Turmeric daily face pack	1	Besan and Turmeric daily face pack f	3	KN95 masks have many of the same protective properties.	5	6	5	4	6	4	6	4	5	5	6	6	5	6	6	5	6	5	4	5	5	6	4	5	6	6	6
2	none	no need	1	pandemic not over	n/a	covering	virus	protection	virus	contagious	risk	pandemic	rampant	dangerous	never needed one	pandemic continues; RSV virus	2	fashion mask softer and more comfortable	2	Usually soft and comfortable	2	felt more comfortable	6	7	6	6	6	7	6	6	6	6	7	6	6	7	7	6	6	5	6	6	6	6	7	7	6	6	6
2	No	Infection	1	protect myself	No, I wear mask after covid	nose	mouth	chin	virus	disease	H1N1	cold	lungs	flu	protect myself	good habits	4	washing from cloth	2	attract for designs	1	use and through	5	3	4	6	5	3	7	4	5	3	4	5	4	6	5	4	6	5	6	4	5	4	5	3	4	6	5
2	Prevents You From Getting Sick	Mental health condition	1	Protects You From Poor Air Quality. Wearing a mask can protect your respiratory system and general health when there is bad air quality because of pollutants.	A medical condition	cloak	disguise	true nature	new disease	new influenza virus	the coronavirus	contagious	spreads quickly	cold	offering protection from pollution and allergens	mask-wearing is helpful for more than reducing the spread of illnesses.	1	good to use	4	easy to use	3	prevent from cold	6	6	6	5	6	6	6	6	6	5	5	6	4	5	6	5	5	4	6	5	5	5	6	5	5	5	4
2	NA	I never thought a mask was ever necessary before covid 19	2	I currently don't wear the mask since it's not mandatory	I hate wearing the mask because I feel that it's hard to breathe in so if it's not mandatory then I don't want to wear one	hot	uncomfortable	sickness	scary	risky	death	sick	contagious	serious	I didn't really have many thoughts about masks before the pandemic. It was very uncommon to see anyone wearing a mask so I would think it's weird if I did see it	I think if people want to wear a mask still then it's fine. I don't think it's weird anymore to wear one and it might be a good thing to wear one if you're sick. But personally for me I don't want to wear a mask maybe only if I'm really sick and need to go out.	2	I like to wear the reusable kind so that I'm not wasting money on buying disposable masks	2	I prefer this because it ends up being cheaper in the long run and you can pick from different colors and designs which is fun	2	I mostly wore a fabric mask that's reusable because it was affordable and reusable and came in colors I liked	2	3	4	5	6	6	6	4	5	5	6	5	5	5	5	5	5	5	5	5	5	5	5	4	5	5	5
1	covid19	fever	1	fever	nothing	fever	cold	ache	fever	ache	cold	fever	cold	ache	fever	cold	1	ache	3	cold	4	fever	6	5	4	4	5	6	5	5	5	4	5	5	6	5	5	6	5	4	5	6	5	5	5	6	5	5	5
2	unnecessary	save from virus	1	safety	breath better	protection	covid	pandemoc	lockdown	virus	mask	pandemic	virus	mask	necessary	necessary	1	i like	1	comfort	1	easy to get	6	5	6	7	6	5	6	6	5	6	5	5	6	5	6	5	5	6	6	5	5	6	5	6	5	5	6
1	pollution and allergens	good experience	1	reduces the spread of respiratory illnesses within the community by reducing the number of infectious particles that may be inhaled or exhaled	Taylor and Asmundson collated data on the reasons that people cite for not wearing masks, such as not believing that masks are effective or the belief that they are an impingement on their freedoms	sprays that may contain germs	cantact with droplets	procted face	like an epidemic but even more widespread over several countries or continents	Most of the diseases posing the greatest risks to humans are contagious meaning that they are caused by an infectious agent and can be spread from person to person.	Water, sanitation, food and air quality are vital elements in the transmission of communicable diseases and in the spread of diseases prone to cause epidemics	It can be very contagious and spreads quickly.	COVID-19 may attack more than your lungs and respiratory system.	COVID-19 most often causes respiratory symptoms that can feel much like a cold, the flu, or pneumonia	Other than preventing or lowering the risk of germ spread, wearing a mask is beneficial in offering protection from pollution and allergens. Here's what else you need to know, including who should wear masks, which masks work best, and how to wear your mask properly.	Here's what else you need to know, including who should wear masks, which masks work best, and how to wear your mask properly.	2	good	3	nice	3	good	6	5	6	4	5	6	5	4	5	6	5	5	6	4	5	6	7	5	4	5	6	5	5	6	7	5	6
1	polution safety purpose	Reduces Exposure to Allergens	1	safety	nill	corona	infection	safety	pandemic	epidemic	home	decease	safety	injection	Protects You From Poor Air Quality. Wearing a mask can protect your respiratory system and general health when there is bad air quality because of pollutant	It's totally fine to keep wearing a mask if it makes you feel more comfortable	1	safety first	1	low cost	2	good	6	5	7	5	5	6	6	5	7	6	6	6	5	5	6	5	7	6	6	5	6	5	6	5	7	7	6
1	Protects You From Poor Air Quality. Wearing a mask can protect your respiratory system and general health.	Prevents You From Getting Sick.	1	Reducing the polution situation.	Physical discomfort and negative effects.	Safety	Covid	Distant	Distant	Flue	Safety	Death	Fear	Dangerous	Part of Personal Protective Equipment.	Mask have been an effective tool for protivity	4	Natural facemask.	2	Variety colour	3	Fully cover.	5	6	5	5	6	5	5	6	5	6	5	6	6	5	5	5	6	5	5	6	6	5	6	5	5	6	5
1	Reduces Exposure to Allergens	Prevents You From Getting Sick	2	Protects Immunocompromised	Keeps You From Spreading Germs	breathing issue	healthy	fear	isolation	community spread	transmission	cold	pneumonia	lungs	Other than preventing or lowering the risk of germ spread, wearing a mask is beneficial in offering protection from pollution and allergens. Here's what else you need to know, including who should wear masks, which masks work best, and how to wear your mask properly	Masks have been an effective tool for preventing the spread of COVID-19 and its variants	3	save our life	3	save our life	3	save our life	5	6	5	6	5	6	5	6	5	6	5	5	6	5	5	6	5	6	5	6	6	5	5	6	5	6	5
1	pollution	NONE	2	COVID-19	COVID-19	Protection	Safety	COVID-19	Outbreak	Contagious	Global	Virus	Quarantine	Health	allergies	Face masks are especially important in situations where physical distancing is challenging, such as in crowded indoor spaces or public transportation.	1	Surgical masks are typically	1	The mask is usually held in place with earloops or ties and is designed to fit loosely over the nose and mouth.	1	It's important to note that surgical masks are intended for single-use only and should be disposed of properly after use.	4	5	6	6	5	4	5	6	4	5	6	4	5	6	4	5	6	5	5	4	6	6	6	5	4	4	5
1	I had worn a face mask before COVID-19 primarily for activities such as woodworking or gardening, where dust and particles in the air could potentially irritate my respiratory system.	There was a lack of information about the efficacy of face masks in preventing the spread of respiratory illnesses. The guidelines for wearing masks were primarily aimed at healthcare workers and those who were sick to prevent them from spreading the infection.	1	The key reason for my decision to continue wearing a face mask after COVID-19 is to protect myself and others from other respiratory illnesses and infections.	The key reason for my decision not to continue wearing a face mask after COVID-19 would be that the risk of infection has significantly decreased and it is no longer recommended by health authorities or required by law.	Protection	Pandemic	Breathable	Crisis	Contagious	Outbreak	Pandemic	Virus	Quarantine	My perception of face masks changed when I traveled to Asian countries where wearing masks in public is a common practice, especially during cold and flu season. I saw people wearing masks on the streets, in public transportation, and even in shopping malls. At first, it seemed odd to me, but I quickly learned that it was a precautionary measure to protect oneself and others from getting sick.	As an AI, I do not have personal thoughts or beliefs. However, the current recommendation from health experts is to wear a face mask in public spaces to slow the spread of COVID-19 and protect oneself and others.	2	Cloth face masks are more comfortable to wear for longer periods of time compared to disposable masks. They are softer on the skin and do not cause irritation.	2	Investing in a good quality cloth face mask can be more cost-effective in the long run compared to constantly purchasing disposable masks.	1	Cloth face masks can be washed and reused multiple times, making them a more sustainable option in the long term.	4	6	5	7	6	3	5	7	5	3	6	5	7	6	4	7	5	6	5	7	6	4	4	6	5	7	3
1	Medical purpose	Emergency room	2	breathing issues	uncomfort	PRECENTION	DISEASE	OBSESSION	DISEASE	INFECTION	PAIN	DEATH	AFFECT	TENSION	personal protective equipment	number of infectious particles	1	COMFORT	3	SUGGETED	3	SUGGESTED	6	6	7	6	5	5	4	5	6	6	5	6	6	5	5	6	5	5	6	6	7	5	6	6	5	6	7
1	safty	none	1	because i am so fear	none	gems	virus	safety	virus	safety	mask	vaccine	handwash	stay health	because i care my health	stay safe	1	none	1	that safe one	1	none	5	4	6	5	7	6	5	6	4	7	6	5	6	5	5	4	6	5	5	6	5	6	5	4	6	5	6
1	fever	cold	1	cold	ache	fever	cold	ache	ache	cold	fever	cold	fever	ache	fever	cold	1	hospital	2	cold	3	covid	6	5	6	5	4	5	5	6	5	6	5	5	6	5	6	5	6	5	6	5	5	6	6	5	6	5	6
1	DUST	STYLE	1	SAFETY	SAFETY	SAFETY	HEALTH	COVER	NOTHING	NOTHING	NOTHING	FEAR	DIE	SAD	NOTHING	SAFETY	3	SAFETY	3	SAFETY	3	SAFETY	5	6	5	6	5	6	5	5	5	6	5	5	6	5	5	6	5	6	5	6	5	6	5	6	5	6	5
1	allergen	I use the face mask before I used it.	1	yes	I plan to use that mask	protection	safe	self care	self awareness	self care	protection	disgusting	sadness	countless death	I think I am the one one person wear this mask	self care	4	allergen so i always have a mask	4	poor class people also use that mask	4	I feel this is safe	4	5	6	5	7	7	5	7	6	7	5	5	7	5	5	7	6	5	2	4	2	5	4	4	5	6	5
1	safty purpose	not comfortable to u starting stge	1	covid 19 is a first a first pandamic	own	safety	not spread to others	not identify	vaccine	geographic spread	grown out of control	vaccine	lockdown	biggest pandemic	n95	surgical mask	1	it s use an throw	1	its buy very easy to use	1	surgical mask are disposable device	6	4	6	6	7	7	7	7	6	7	5	1	7	7	1	1	1	1	6	7	7	7	1	1	1	1	1
1	fear	fear	1	mask	mask	good	safe	product	good	safe	product	good	safe	product	fear	yes	2	aware	2	good	2	good	5	5	6	6	5	5	6	6	5	5	6	6	5	6	5	5	6	6	6	6	6	6	5	5	5	5	6
1	allergen	I use that mask before corona	1	yes	I plan to use that mask	protection	safe	selfcare	self awarness	selfcare	protection	disgustin	sadness	countless death	I always feel I have a ill person	selfcare	4	allergen so I use that	4	finance free	4	the is very safety for covid	4	5	6	5	6	5	7	5	5	6	7	7	6	5	4	5	6	5	5	6	7	5	4	5	5	6	7
1	Dust	Not compulsory	1	Good for health and safety	Breath problem and uncomfortable	Safety	Breath filter	dust free	house	no work	no shop	death	pandemic	problem	Good one for safety don't stop that	Good	3	For safety	3	Safety	3	Comfortable	4	6	5	6	5	5	5	6	7	6	6	5	6	5	5	5	6	6	7	4	6	6	6	6	5	6	7
1	air pollution	i use before	1	safety	i use after corona	selfcare	safe	fear	protection	self care	safety	countless death	fear	self care	safe	self care only	4	I like to use	4	Environment freindly	4	safe natural fabric so I use that	4	5	7	5	7	5	7	6	5	6	5	5	6	5	5	7	6	5	6	6	5	7	4	5	6	5	7
1	air pollution	not daily use	1	safety	strictly order of Government	safety	corona	decease	pandemic	emergency	oxygen	corona	decease	safety	Reduces Exposure to Allergens.	It's totally fine to keep wearing a mask if it makes you feel more comfortable	1	safety	2	low price	1	comfortable	5	4	6	5	6	5	5	7	5	4	6	5	5	7	6	5	7	5	6	7	5	7	5	4	6	5	7
2	no need	none	2	none	covid is gone	safety	prevent	covid	lockdown	cannot live normal life	social distance	fear of covid	fear mask	handwash	it is not necessary	it is really very need from prevention of covid	2	tired of wearing same type mask	4	face allergies	1	it is easy to use and dispose	6	7	6	7	7	6	6	7	6	7	7	6	7	7	6	7	6	6	7	7	7	7	6	7	7	6	6
2	offering protection from pollution	Prevents You From Getting Sick. ...	1	face masks help protect against viruses other than COVID-19	he Centers for Disease Control and Prevention	Reduces Exposure to Allerge	Prevents You From Getting Sick	Keeps You From Spreading Germs	A pandemic occurs over a wide geographic area and affects a high proportion of the population.	the coronavirus is still with us	define an epidemic and explore historical examples such as yellow fever, Ebola virus, and SARS-CoV	It can be very contagious and spreads quickly	organ damage affecting the heart, kidneys, skin and brain	isolation and loneliness, job loss	What are the reason for wearing a face mask? Other than preventing or lowering the risk of germ spread, wearing a mask is beneficial in offering protection from pollution and allergen	because they choose to for their own reasons	4	offering protection from pollution and allergens	4	offering protection from pollution and allergens	4	offering protection from pollution and allergens	6	7	5	6	7	6	5	6	7	6	6	7	6	6	6	6	7	6	2	3	1	2	7	6	7	6	7
2	N/a	No reason for wearing one	2	N/a	It is not needed because i have been vaccinated.	Smothering	Hot	Responsible	Scary	Death	Sickness	Virus	Sick	Lungs	I did not ever see a reason to wear one before covid 19	I feel it is not necessary because I have been vaccinated.	1	They are the cheapest	1	They are the easiest to find	1	They come in a huge box	1	2	5	7	5	6	6	7	7	5	6	5	5	5	7	7	7	5	5	5	5	5	6	5	6	7	2
1	to protect myself	not concern about health/catching a potentially dangerous virus	2	Hopefully there will be more of an awareness when a virus is on the 'loose' and I am not in a situation where I would be likely to catch it first	I want to breathe without the discomfort	hide	breathe	virus	death	virus	clean	death	cough	virus	I did not need to as I was not in a likely situation to catch a virus. As a science teacher, I do mask up when necessary for things I do which could be dangerous	I have received all of my vaccines. Due to my lifestyle, I don't often come in contact with people who likely have the virus. If I notice things getting worse, I will mask up	4	The objective is to prevent particles from myself getting out and prevent particles from someone else getting in. I am not immunocompromised and I don't work in a situation where I come into contact with others who are spreaders.	1	Hygiene and single use	4	It was difficult to find N95 masks and I was not in a situation where my life depended on me wearing it. I doubled masked with surgical and cloth or two cloth and kept a low profile away from humans.	5	7	3	7	7	7	7	2	4	2	5	3	3	4	7	7	7	7	5	5	5	7	6	6	6	6	6
2	N/A	Never had a reason to wear one.	1	If I'm not feeling well and I have to be around people, I will wear a mask.	N/A	Safety	Prevention	Thoughtfulness	Illness	Fear	Prepardness	Pandemic	Scary	Illness	I'd never really thought about it.	I think it's a good safety precaution.	2	That's what I find comfortable.	2	I think it adds fun to wearing a mask.	2	That's what felt right to me.	6	7	4	7	7	7	7	7	6	6	7	7	7	7	7	5	4	6	6	6	6	6	7	7	7	7	7
1	Flu Season or visiting immune compromised friends.	Apathy.	1	I prefer the privacy and extra protection.	Easier lifestyle.	protect	safe	private	contagion	virus	sick	contagious	ill	spread	I always looked at it as a good idea if visiting sick people or being ill myself.	COVID is rampaging again and I'm getting up there in age so I'm trying to protect myself and others.	3	This offers the most protection.	3	This offers the most protection.	3	This offers the most protection.	5	6	4	7	7	7	7	4	7	7	7	7	5	7	7	2	6	6	7	7	7	7	6	5	6	6	2
1	I had the flue and did not wish to spread it.	People were not accustomed to it.	1	So that when I am sick I don't spread my germs to others through coughing or sneezing.	I will wear a face mask.	safe	necessary	health	fear	nervousness	shock	shock	despair	depression	I wore a face-mask when I was sick only if I had to go out in public. I did not want to spread my germs.	I still carry my mask and put in on if I am in a crowd and a few people are coughing. Covid is not over.	3	It is the face-mask that was recommended to me by my healthcare professional.	3	It is the mask my doctor recommended and I feel safer using it.	3	It was the one my doctor recommended for me.	6	7	7	7	7	7	7	6	5	5	5	5	5	6	7	7	7	7	5	5	5	5	5	6	6	6	6
1	protect myself and others from virus	uncomfortable, dont want someone telling me i have to do it	2	Protect others, if there is a new outbreak i want to safeguard	more comfy not having to, no restriction	fear	safety	smart	deadly	outbreak	unsafe	novel	worrisome	widespread	weird because never thought i needed it	mixed feelings for some but not all	1	Dont usually use one. But I would wear surgical because its better for health	3	N95 proven to work well	3	Biggest reason was they said it was safest.	3	4	6	5	4	6	4	6	5	4	5	6	6	6	3	2	5	5	3	2	1	4	3	5	5	6	5
1	SAFETY	SAFETY	1	SAFETY	SAFETY	SAFETY	protect	safe	safe	avoid noise	protection	danger	suffering	losses	For the safety purpose and take care of skin.	To avoid the virus and also take our won safety	4	It make more comfortable and reuseable.	4	It take average price to use .	1	It is one time use mask and remove it .	5	4	4	5	4	4	5	4	5	4	6	6	6	5	4	4	5	4	3	3	3	3	5	5	6	6	5
2	I did not wear a face mask	I did not think I needed one	2	I do not plan to wear a face mask	I think transmission is low	health	barrier	cover	sickness	disease	widespread	air	pandemic	sickness	I wore a face mask and though it was helpful	I think people should have the choice	1	They are plentiful and easy to get	1	They aren't too obtrusive	1	They were the masks I was able to get	2	6	5	6	6	6	5	4	5	5	5	6	6	6	5	2	3	3	2	2	2	2	5	5	5	6	4
2	n/a	didn't realize i needed one	1	for protection	n/a	protective	coughing	sick	quarantine	death	widespread	virus	face mask	sick	never thought about it	helps prevent spread of disease	1	effectiveness	1	effectiveness	1	effectiveness	5	6	2	6	6	6	6	6	5	5	6	5	5	5	5	4	4	4	3	4	5	3	5	5	5	5	4
2	n/a	I never knew somethings before covid-19 that I know now.	1	I know now how germs and spittle fly out of people's mouths when they speak. I now know.	n/a	smart	safe	considerate	worry	scared	nervous	death	illness	fear	I never really thought about it.	I wear a mask still today and I will continue to because these type of illnesses are just going to occur more often.	1	they are disposable and I can use a fresh one next time staying germ free.	3	they are the safest	1	I bought a box of them and I switched them out often.	7	7	1	7	7	7	7	7	7	6	5	7	7	7	7	7	7	7	5	5	5	5	7	7	7	7	7
2	unnecessary	irrelevant	1	safety	breathe better	covid	vaccination	pandemic	vaccination	pandemic	mask	mask	vaccination	pandemic	irrelevant	necessary	1	i like	1	comfort	1	easy to get	6	7	5	6	7	5	5	6	5	5	6	5	6	6	5	6	5	4	3	4	3	4	4	3	5	3	4
2	I had not worn one because I had not been in a pandemic or in a culture that required a face mask.	I had no experience because I had not been in a pandemic.	2	I will not wear a face mask unless we have a pandemic or a resurgence of COVID.	I will not wear a face mask unless we have pandemic or more COVID cases.	protection	pandemic	COVID	COVID	sickness	death	pandemic	sickness	death	I thought about dentists and surgeons wearing a face mask because they are the only ones that I had seen wearing a face mask.	I think I will wear a face mask during an epidemic or pandemic or when visiting a hospital.	1	I wear them because they are readily available to wear during COVID.	1	I prefer to wear this one because I have a supply of them at home.	1	They were readily available and I had a supply of them at home.	3	5	2	5	6	6	6	6	5	5	6	6	6	6	5	3	3	4	3	4	3	4	5	4	5	5	4
1	I was doing remodeling and didnt want dust and paint smells getting to me	You didnt do anything with caustic chemicals or smells	2	None	It will boost my immune system to continue to be exposed to germs.	Germ	Fear	Hide	Death	Disease	Quarantine	Pandemic	Unprecedented	Lockdown	It was just a tool to use briefly and then discard.	It is helpful but not necessary in most circumstances wxcept for the immune compromised	1	It is wasy to use and cheap and disposable	1	It is easy to use and discard immediately	4	I wore many of those listed. Mostly reusable ones so they could be reused.	1	1	2	5	3	7	4	4	5	4	5	6	5	6	2	1	2	3	3	3	3	2	2	1	2	3	1
1	safety	danger	1	danger	safety	disese	good	safety	medical	good	ache	fever	safety	good	fever	cold	1	nothing	2	nothing	1	fever	6	5	4	5	4	5	5	6	5	4	5	5	6	5	6	5	4	5	5	4	5	5	5	5	6	5	4
1	To be safe and protected	Not to catch the virus	2	Safety and not getting sick	I do not need it	Virus	Covid	Protection	Scary	Worried	Hospital	China	President	Lockdown	I didn't not care for it	I don't mind wearing one to avoid getting sick	2	I am a fashionista and I love different logos, colors and types	2	I want to stand out and look good	2	I bought a lot of sports, fashion types of mask	7	6	4	6	6	7	4	6	6	5	6	6	5	6	6	6	4	6	5	7	4	5	7	7	6	7	4
1	cleaning, prevent inhale dust	n/a	1	to be safe	n/a	protection	safe	healthy	sick	death	sad	isolation	sad	restricted	nothing, people wear mask if they are sick to prevent others from getting sick	i think it's good, better be safe than sorry	1	easy to use, cheap	1	easy to use, cheap	1	can get easily and cheap	5	6	5	5	6	5	6	5	6	6	6	5	5	6	5	5	6	5	5	5	5	5	5	6	5	5	5
1	pollution	NONE	2	COVID-19	COVID-19	Protection	Safety	COVID-19	Outbreak	Contagious	Global	Virus	Quarantine	Health	pollution	the virus spreads from person to person.	1	A surgical mask, also known as a single-use facemask, is a loose-fitting disposable device that covers the nose and mouth and provides a barrier to fluid droplets, sprays, and large respiratory particles.	1	Surgical masks are typically made of three layers of materials, including an outer layer for fluid resistance, a middle layer for filtration, and an inner layer for moisture absorption.	1	they are not as effective as respirators, such as N95 masks, in filtering out smaller particles, including airborne viruses.	4	6	7	6	5	4	5	5	4	6	5	4	5	6	6	5	4	6	5	6	7	7	5	6	6	7	5
1	Selfcare	none	1	health issues	none	safety	gems	virus	fear	people	health	virus	handwash	clean	it just health caring only	stay healthy	1	because i used to one time the mask	1	because mask are use one time	1	healthy safety	5	4	7	5	6	4	4	6	5	4	6	5	6	5	5	6	6	5	3	4	1	3	5	7	6	5	6
1	MY SAFETY	NO REASON	1	MY SAFETY	NO REASON	OFFERINGPROTECTION FROM POLLUTION	ALLERGENS	MY HEALTH SAFETY	AN EPIDEMIC IS A DISEASE OUTBREAK	RAPIDLY SPREADING IN A LIMITED REGION	MULTIPLE REGIONS ACROSS THE GLOBE	IT IS THE LARGEST CATEGORY FOR AN RNA VIRUS	VERY DENGEROUS VIRUS	COLD-CAUSING VIRUS IS A CAUSING YOU FEVER	MY SAFETY AND GOOD	GOOD DECISION	3	N95 GOOD MASK	3	GOOD	3	GOOD	6	7	5	4	5	6	7	5	6	5	6	6	5	4	6	6	5	6	6	7	5	6	6	5	4	6	5
1	dust allergies	nothing	1	dust	nothing	comfort	safety	good	denger	safety	good	safety	die	good	nothing	safety	2	good quality	2	fabric	1	safty	6	5	4	5	6	5	4	4	5	6	5	6	5	5	6	5	6	5	6	5	5	6	6	5	6	5	4
1	fever	cold	1	cold	ache	fever	cold	ache	ache	fever	cold	cold	ache	fever	cold	fever	1	fever	2	cold	3	covid	5	6	5	4	5	5	6	5	5	5	6	6	5	6	6	5	4	5	6	5	4	5	6	5	5	6	6
1	NO	NO	1	SAFETY PURPOSE	SAFETY PURPOSE	SAFETY	COVER	DUSK	SAFETY	SAFETY	SAFETY	SAD	HEALTH	MASK	NOTHING	NOTHING	3	NOTHING	3	NOTHING	3	NOTHING	5	6	5	6	5	6	5	6	5	6	5	5	6	5	5	6	5	6	5	6	5	6	5	6	5	6	5
1	Protect your general health.	Nothing.	1	Protect my health and safezone.	nothing.	cloak.	disguise.	hiding.	Virus.	Disease.	Infection	It can be very contagious and spreads quickly.	Over one million people have died from COVID-19 in the United States.	COVID-19 may attack more than your lungs and respiratory system.	Nothing.	Protect my self.	2	Protects You From Poor Air Quality.	4	It is natural fabrics.	3	It is useful for personal protection.	6	5	6	5	6	5	6	5	5	6	5	4	5	6	5	4	5	6	5	6	5	5	5	6	5	5	5
2	no	no need.	2	no	nothing need	COVID-19	DEATH	SAD	food	outside	news	death	fear	virus	not efficient	It is used some non visible virus or dust not affected.	1	It is very useful compare to other mask.	4	Cost is low.	1	Avoid COVID-19 disease.	5	7	4	5	6	5	3	4	6	4	5	5	6	7	5	4	5	6	6	5	4	6	6	5	4	5	6
1	pollution and allergens	good experience	1	good experience	Taylor and Asmundson collated data on the reasons that people cite for not wearing masks, such as not believing that masks are effective or the belief that they are an impingement on their freedoms	sprays that may contain germs	cantact with droplets	procted face	like an epidemic but even more widespread over several countries or continents	Most of the diseases posing the greatest risks to humans are contagious meaning that they are caused by an infectious agent and can be spread from person to person.	Water, sanitation, food and air quality are vital elements in the transmission of communicable diseases and in the spread of diseases prone to cause epidemics	It can be very contagious and spreads quickly.	COVID-19 may attack more than your lungs and respiratory system.	COVID-19 most often causes respiratory symptoms that can feel much like a cold, the flu, or pneumonia	Other than preventing or lowering the risk of germ spread, wearing a mask is beneficial in offering protection from pollution and allergens. Here's what else you need to know, including who should wear masks, which masks work best, and how to wear your mask properly.	Here's what else you need to know, including who should wear masks, which masks work best, and how to wear your mask properly.	2	nice mask	3	protect good	2	good one	5	6	7	4	5	6	5	4	5	6	4	5	6	4	6	5	6	7	5	6	7	6	5	6	7	5	4
1	Reduces Exposure to Allergens	Protects Immunocompromised.	2	Keeps You From Spreading Germs	Prevents You From Getting Sick	breathing issue	healthy	fear	isolation	community spread	transmission	cold	pneumonia	lungs	Other than preventing or lowering the risk of germ spread, wearing a mask is beneficial in offering protection from pollution and allergens. Here's what else you need to know, including who should wear masks, which masks work best, and how to wear your mask properly.	It's totally fine to keep wearing a mask if it makes you feel more comfortable	3	its safe	3	its safe for our life	3	its safe for our life	5	6	6	5	6	5	5	6	5	6	5	5	6	5	5	6	5	6	5	6	5	6	5	6	5	5	5
1	Health and Safety: People with respiratory illnesses, weakened immune systems, or allergies wore face masks to protect themselves from airborne pollutants, allergens, or contagious diseases. 2. Occupational Hazards: Workers in certain industries (e.g., construction, healthcare) wore masks to protect themselves from dust, fumes, chemicals, or infectious materials in their work environment. 3. Envi…	Many health experts believed that face masks were not necessary for the general public and were reserved for healthcare workers, individuals with respiratory infections, or those caring for people with respiratory illnesses. This belief was based on the fact that respiratory viruses primarily spread through close contact, such as respiratory droplets produced when an infected person coughs or sne…	1	Prevention of respiratory illnesses: Face masks have proven effective in reducing the transmission of various respiratory illnesses such as the flu, common cold, or other viral infections. Continuing to wear masks can help protect oneself and others from these illnesses. 2. Protection for vulnerable individuals: Wearing masks can be a way to protect vulnerable populations, including the elderly, …	Vaccination: If a person has received the COVID-19 vaccine and trusts its effectiveness, they may feel protected against the virus and choose not to wear a mask. 2. Herd immunity: Some individuals may believe that once a substantial portion of the population has been vaccinated or has acquired immunity through infection, the risk of transmission will be significantly reduced, making masks unneces…	Protection	pandemic	breath	Health crisis,	contagion	global impact..	Coronavirus	lockdown	vaccine	Before the pandemic, wearing face masks was primarily associated with specific contexts such as healthcare settings or areas with high levels of air pollution. In many parts of the world, it was not common for the general public to wear face masks as a preventive measure against infections or disease transmission, unless they had respiratory issues or were advised to do so by healthcare professio…	Vaccination: If a person has received the COVID-19 vaccine and trusts its effectiveness, they may feel protected against the virus and choose not to wear a mask. 2. Herd immunity: Some individuals may believe that once a substantial portion of the population has been vaccinated or has acquired immunity through infection, the risk of transmission will be significantly reduced, making masks unneces…	3	Vaccination: If a person has received the COVID-19 vaccine and trusts its effectiveness, they may feel protected against the virus and choose not to wear a mask. 2. Herd immunity: Some individuals may believe that once a substantial portion of the population has been vaccinated or has acquired immunity through infection, the risk of transmission will be significantly reduced, making masks unneces…	3	Reduced transmission rates: If COVID-19 transmission rates decrease significantly, some people may choose not to wear masks due to the perceived lower risk of infection.	3	Mask fatigue: Wearing a mask can sometimes be uncomfortable or inconvenient, leading some individuals to stop using them once the pandemic situation improves. 5. Government guidance: If health authorities or governments declare that it is no longer necessary to wear masks, some people may follow these guidelines and discontinue mask usage.	5	6	6	6	5	5	7	5	4	5	6	4	5	6	5	6	7	5	7	6	6	7	5	6	7	6	5
1	pollution	NO	2	COVID-19	COVID-19	Protection	Safety	COVID-19	Outbreak	Contagious	Global	Virus	Quarantine	Health	Overall, wearing face masks was not a common or widely accepted practice in most parts of the world before the COVID-19 pandemic.	They are also recommended for individuals who may be asymptomatic or have mild symptoms but can still transmit the virus to others unknowingly.	3	including viruses	3	bacteria	3	healthcare	6	5	5	5	6	7	7	5	4	6	7	4	6	7	7	6	5	5	4	5	6	7	7	5	6	5	5
1	had the flu	was not emphasized much	1	health and safety reasons	bothers me and makes it harder to breathe	protection	compliant	safety	fear	death	isolation	virus	China	Trump	I thought it was necessary to protect others from me rather than the other way around.	I think it should only be used when one is having symptoms or was around someone who tested positive for a virus.	1	This the most common, the most inexpensive, and most comfortable option I have.	1	It's easy to wear and simple to take off	1	This was available and I felt protected when having one on.	2	3	5	6	5	5	5	6	6	5	5	5	6	7	5	5	6	5	6	5	6	3	5	6	7	5	6
1	Reduces Exposure to Allergens	Prevents You From Getting Sick	2	Keeps You From Spreading Germs	Protects Immunocompromised	breathing issue	healthy	fear	isolation	community spread	transmission	cold	pneumonia	lungs	Other than preventing or lowering the risk of germ spread, wearing a mask is beneficial in offering protection from pollution and allergens. Here's what else you need to know, including who should wear masks, which masks work best, and how to wear your mask properly	It's totally fine to keep wearing a mask if it makes you feel more comfortable	3	save our life	3	save our life	3	save our life	5	6	5	6	5	6	5	6	5	6	5	5	6	5	5	6	5	6	5	6	6	5	5	6	5	6	5
1	spread flu	it is not necessary to wear mask before covid	1	because that was an safety for my health	safeguard against diseases and transmission	safety	covid	distance	death	fear	danger	flu	spread	injection	the moral skin caring and spreading issues	reduce exposure for allergens getting sick	2	fully covering	2	variety of designs	3	fully covered	6	5	6	5	6	4	5	6	6	5	6	6	5	5	6	4	6	5	6	5	6	6	5	6	5	6	5
1	SPREADED COVID	NO	1	YES	YES	PROTECTION	N-95	SAFETY	LOCKDOWN	SARS	Nipah virus	MASK	SAFETY	ONA AND DISTACNE	Other than preventing or lowering the risk of germ spread, wearing a mask is beneficial in offering protection from pollution and allergens	Masks have been an effective tool for preventing the spread of COVID-19 and its variants,	3	IT IS MORE SAFER THAN OTHER MASK	3	IT IS MORE SAFER THAN OTHER MASK	3	IT IS MORE SAFER THAN OTHER MASK	6	5	6	7	6	5	6	7	6	5	6	6	5	6	6	5	6	5	6	5	6	5	5	5	6	6	5
1	During the COVID-19 pandemic, the use of facemasks seems to be an accepted procedure worldwide although a scientific discussion is going on up ... Missing: Q1- ‎| Show results with: During the COVID-19 pandemic, the use of facemasks seems to be an accepted procedure worldwide although a scientific discussion is going on up ... Missing: Q1- ‎| Show results with:	During the COVID-19 pandemic, the use of facemasks seems to be an accepted procedure worldwide although a scientific discussion is going on up ..	1	During the COVID-19 pandemic, the use of facemasks seems to be an accepted procedure worldwide although a scientific discussion is going on up ..	During the COVID-19 pandemic, the use of facemasks seems to be an accepted procedure worldwide although a scientific discussion is going on up ..	Laure Serresse,	Sophie Lavault,	Guerder	Wear a mask.	Avoid touching your mouth, face or eyes.	Stay home and avoid nonessential activities.	Get your COVID-19 vaccine when it's your turn. Vaccination is key to ending the COVID-19 pandemic.	Wash your hands.	Stay home and avoid nonessential activities.	Wearing face masks is recommended as part of personal protective equipment and as a public health measure to prevent the spread of coronavirus ...	Marr said research shows that high-quality masks can block particles that are the same size as those carrying the coronavirus. Masks work, Mar	4	confortable	3	good	3	nice	5	6	5	6	5	6	5	6	5	6	5	5	6	7	5	6	7	6	6	5	6	7	6	5	6	5	6
1	allergies	NO	2	COVID-19	COVID-19	Protection	Safety	COVID-19	Outbreak	Contagious	Global	Virus	Quarantine	Health	In many Western countries, wearing face masks was not common or considered necessary in everyday life.	Overall, wearing a face mask is currently widely recommended as a responsible and effective measure to help protect oneself and others from COVID-19 transmission.	3	These masks are made of multiple layers of synthetic fibers that create a tight-fitting seal around the nose and mouth	3	https://deepai.org/chat#:~:text=N95%20masks%20are%20primarily%20used%20in%20healthcare%20settings%2C%20such%20as%20hospitals%2C%20clinics%2C%20and%20laboratories%2C%20where%20there%20is%20a%20high%20risk%20of%20exposure%20to%20infectious%20respiratory%20diseases.	3	t is named after its ability to filter out 95% of airborne particles, including viruses, bacteria, and other harmful substances.	6	5	4	5	5	5	6	6	5	6	7	5	6	6	5	6	7	5	5	5	6	7	6	5	6	6	4
1	polution	less polution	1	covid-19	nothing	population	polution	fogg	lock down	leave	family	lockdown	corona	face mask	polution	covid 19	3	easy to wear	2	good look	1	hospital purpose	3	3	4	5	6	6	5	4	4	5	6	4	5	6	5	6	7	6	5	6	7	6	4	5	6	7	6
1	to prevent infection	nothing	1	infecction	freeness	FACE MASK | definition in the Cambridge English Dictionary.	no	no	the flu is a common endemic virus for which there are treatment options and a yearly vaccine. However, there can be outbreaks of flu that can lead to an epidemic, with the potential to occasionally become a pandemic as was seen with the H1N1 flu pandemic of 2009.	no	no	no	no	no	nothing	Masks have been an effective tool for preventing the spread of COVID-19 and its variants, like the omicron variant. Masks also help protect against influenza and other viruses. The Centers for Disease Control and Prevention (CDC) recommends personal masks in public when hospital admissions from COVID-19 are high.May 30, 2023	1	awesome	3	aweome	3	awesome	6	6	6	6	6	6	6	6	6	7	6	6	6	7	6	7	6	7	6	7	6	7	6	6	6	7	6
1	Wearing a mask reduces the spread of respiratory illnesses within the community by reducing the number of infectious particles that may be inhaled or exhaled.	rotects You From Poor Air Quality. Wearing a mask can protect your respiratory system and general health when there is bad air quality because of pollutants	2	Wearing a mask reduces the spread of respiratory illnesses within the community by reducing the number of infectious particles that may be inhaled or exhaled	Taylor and Asmundson collated data on the reasons that people cite for not wearing masks, such as not believing that masks are effective or the belief that they are an impingement on their freedoms	saftey	pracation	hyginic	public safety	humans	influens	population	Wear a mask	Wash your hands.	Stay home and avoid nonessential activities	Maintain physical distance.	3	Get your COVID-19 vaccine when it's your turn. Vaccination is key to ending the COVID-19 pandemic.	3	Improving Ventilation. Getting Tested for COVID-19 If Needed.	3	Pandemics can cause significant, widespread increases in morbidity and mortality and have disproportionately higher mortality impacts on LMICs. Pandemics can cause economic damage through multiple channels	6	5	6	5	6	6	5	6	6	5	6	5	6	5	6	5	6	5	6	5	6	3	5	6	5	6	5
1	Reduces Exposure to Allergens	Prevents You From Getting Sick	2	Protects Immunocompromised	Keeps You From Spreading Germs	breathing issue	healthy	fear	isolation	community spread	transmission	cold	pneumonia	lungs	Other than preventing or lowering the risk of germ spread, wearing a mask is beneficial in offering protection from pollution and allergens. Here's what else you need to know, including who should wear masks, which masks work best, and how to wear your mask properly	Masks have been an effective tool for preventing the spread of COVID-19 and its variants	3	save our life	3	save our life	3	save our life	5	6	5	6	5	6	5	6	6	5	6	6	5	5	5	6	5	6	6	5	6	5	5	6	5	6	5
1	Other than preventing or lowering the risk of germ spread, wearing a mask is beneficial in offering protection from pollution and allergens.	not believing that masks are effective or the belief that they are an impingement on their freedoms.	1	reduces the spread of respiratory illnesses within the community by reducing the number of infectious particles that may be inhaled or exhaled.	The Centers for Disease Control and Prevention (CDC) recommends personal masks in public when hospital admissions from COVID-19 are high.	pollution	safety	skin care	fear	health	safety	spread	affect	instability	offering protection from pollution and allergens.	that high-quality masks can block particles that are the same size as those carrying the coronavirus.	3	good quality	3	safety important	3	health	6	5	6	5	5	5	5	6	5	6	5	6	5	6	6	5	6	5	6	5	5	6	6	5	6	5	6
1	SAFETY	YES	1	YES	YES	SAFETY	PORTACTION	FNL	COID	SARS	Bubonic	MASK	LOCKDOWN	SAFETY	offering protection from pollution and allergens	offering protection from pollution and allergens	3	IT IS SAFER MORE THAN OTHERS	3	IT IS SAFER MORE THAN OTHERS	3	IT IS SAFER MORE THAN OTHERS	6	5	6	5	6	6	7	6	6	5	6	6	5	6	6	5	6	5	6	5	6	5	6	5	6	5	6
1	spread virus	NOTHING	1	nothing	Reduced risk perception	Safety	Inconvenience	Protection	Spread	Uncertainty	Isolation	Loss	Resilience	Disruption	Face masks were primarily used in medical settings by healthcare professionals and individuals with compromised immune systems. They were seen as a tool for preventing the spread of infectious diseases.	Higher vaccination rates generally correlate with decreased mask-wearing due to increased protection against severe illness. However, the effectiveness of vaccines can vary against new variants, and vulnerable individuals may still benefit from masks.	1	Surgical masks are effective in blocking large droplets and splashes that may contain germs, bacteria, and viruses. While they don't offer the same level of protection as respirators like N95s, they can significantly reduce the risk of transmission in many situations.	1	Surgical masks are relatively lightweight and breathable, making them comfortable to wear for extended periods. This is especially important for people who find other types of masks, like respirators, too restrictive.	1	Surgical masks are widely available and relatively inexpensive compared to other options. This makes them accessible to a large portion of the population.	6	6	4	5	5	6	4	5	7	6	5	6	5	6	6	5	6	6	3	4	3	3	6	7	6	6	6
1	Wear a mask	Wash your hands.	1	Stay home and avoid nonessential activities.	Maintain physical distance.	Improving Ventilation.	Getting Tested for COVID-19 If Needed.	They feared a new cholera pandemic. Experts warned of the impending threat of a global pandemic	Improving Ventilation.	epidemic (noun as in widespread disease) Strongest matches. contagion outbreak pest plague rash scourge spread wave	COVID-19 is the first pandemic known to be caused by the emergence of a new coronavirus.	the coronavirus is still with us. We are in the process of shifting from the pandemic phase, which is the unhindered spread of an infectious disease, to the endemic chapter of COVID-19.	common source outbreaks	A pandemic is an epidemic of infec- tious disease that spreads through human popula- tions across a large region,	camouflage conceal cover-up hide obscure shield veil. Strong matches. beard cloak cover defend dissemble dissimulate front guard protect safeguard screen secrete.	propagated or progressive epidemics.	3	COVID-19 is the first pandemic known to be caused by the emergence of a new coronavirus.	3	this study goes beyond the genetic analysis of these remains to make claims about the three known plague pandemics: the Justinianic (541–750), the Black Death, which began in the 1340s, and the third pandemic	3	measles, and polio are prime examples of epidemics. An epidemic disease doesn't necessarily have to be contagious. West Nile fever and the rapid increase in obesity rates are also considered epidemics	5	6	5	6	5	4	5	6	5	6	5	5	6	5	5	6	5	6	5	6	5	6	6	5	6	7	5
1	Protection from pollution: In highly polluted areas, particularly in cities with poor air quality, people wore face masks to filter out dust particles, smoke, and other harmful pollutants. 2. Allergies and respiratory issues: Those with seasonal allergies or respiratory problems such as asthma often wore masks to reduce their exposure to allergens or irritants. 3. Occupational safety: Certain pro…	Before the emergence of COVID-19, the general perception was that face masks were primarily useful for healthcare professionals in specific settings like hospitals, clinics, or during certain medical procedures. The general public did not consider it necessary to wear masks as a preventive measure in everyday life due to the relatively low occurrence of contagious respiratory illnesses and limite…	1	Protection against other respiratory illnesses: Face masks have shown effectiveness in reducing the transmission of various respiratory diseases, such as the flu or common cold. Some individuals may choose to continue wearing masks to prevent the spread of these illnesses. 2. Personal preference for added safety: The pandemic has made people more conscious of personal hygiene practices. Wearing a…	Vaccination: With a sufficient portion of the population vaccinated against COVID-19, some individuals may feel that the risk of contracting or spreading the virus has been significantly reduced. Consequently, they may choose not to continue wearing masks. 2. Public Health Guidance: If public health authorities declare it safe to omit face masks due to a decline in COVID-19 cases or the absence o…	Protection	pandemic	breath	Health crisis,	contagion	global impact.	lockdown	Coronavirus	vaccine	Face masks were primarily associated with situations such as air pollution, occupational hazards, or when being sick to prevent spreading germs. The general public did not typically wear masks as a preventive measure in everyday life, unlike the current situation where face masks have become a widely recommended measure to reduce the spread of COVID-19.	Before the pandemic, wearing face masks was primarily associated with specific contexts such as healthcare settings or areas with high levels of air pollution. In many parts of the world, it was not common for the general public to wear face masks as a preventive measure against infections or disease transmission, unless they had respiratory issues or were advised to do so by healthcare professio…	3	Protection against respiratory droplets: Wearing a face mask can help prevent the release of respiratory droplets that may contain the virus. This is particularly important in situations where social distancing may be challenging or not possible.	3	Source control: Wearing a mask not only protects the wearer, but also those around them. If an individual unknowingly carries the virus, wearing a mask can help prevent the spread of respiratory droplets to others.	3	Complementary measure: Face masks are not standalone solutions, but are part of a comprehensive approach that includes other preventive measures such as hand hygiene and maintaining physical distance. Wearing a mask alongside these measures can provide an additional layer of protection.	4	5	6	7	5	5	6	7	5	6	5	5	6	5	4	5	6	7	5	6	7	5	5	6	7	5	6
1	fever	fever	1	its so hard	its so hard	face	pack	whitening	epic	epic	epic	covid	covid	covid	its so marvelous and hazard	It's totally fine to keep wearing a mask if it makes you feel more comfortable	2	nope	3	nope	2	nope	6	5	6	6	7	6	5	5	6	7	7	6	5	7	6	7	7	6	5	5	6	7	6	5	6	7	6
1	yes, I am going to hospital body checkup	no	1	yes the covid-19 after increase many type of virus effect the people	no	Protection	pandemic	prevention	Health	global	quarantine	Coronavirus	lockdown	vaccine	The mask wearing first hospital doctor and patient to compulsory face mask wearing but other normal people not compulsory wearing the face mask i thinked	Since the onset of the COVID-19 pandemic, the understanding of the virus' modes of transmission and the effectiveness of face masks in reducing its spread has evolved.	3	These masks are capable of filtering out at least 95% of airborne particles, hence the name "N95."	3	The N95 mask is considered one of the best masks for filtration and protection against airborne particles, including viruses	3	the mask is face wearing comfortable and easy breathe	6	6	5	7	6	6	7	7	7	6	7	6	7	6	6	5	6	7	6	7	7	5	5	7	6	7	6
1	working with dusty areas	n/a	1	Healthier	n/a	helpful	effective	security	serious	severe	disease	Hospital	sickly	breathing	I always thought it would be a good idea for people to wear especially during flu season. There are also times when working with certain substances that it is necessary.	With covid and flu cases increasing I feel it is the smart thing to do.	2	Because it is reusable and I am ceoncerned about the environment.	2	This is the best for being concerned about the environment. They are reuseable so the cost will be less eventually.	2	It is what was available to me. SIngle use masks were difficult to find.	5	6	6	7	7	7	7	4	5	5	5	6	7	6	5	5	5	5	2	3	5	5	6	5	6	6	1
2	N/A	Never felt the need.	1	New strains of respiratory diseases.	N/A	protection	health	safety	danger	disease	precautions	disruption	deadly	precautions	I never thought about it.	I have already had COVID once, and I got it on a rare occasion when I wasn't wearing a mask. I want to live longer, so I will mask up.	3	It is the most protective.	3	These can be reused but are very effective.	3	They stop the disease.	5	7	4	7	7	7	7	4	6	6	7	5	5	7	5	4	5	5	5	5	5	4	6	6	6	6	4
1	SAFETY	SAFETY	1	SAFETY PURPOSE	FRESH AIR	40% oxygen	cloak and disguise	American English	worldwide spread	new disease	new influenza virus	SARS-CoV-2	coronavirus disease	"CO" stands for "corona," "VI" stands for "virus," D stands for "disease" and 19 indicates the year the virus was first discovered.	PERVENT YOURSELF WITH ANY PERSON WHO HAVE COVID 19	SAFETY	3	N95 MASK IS BEST TO PREVENT YOU IN DESISES	3	GOOD FOR HEALTH	3	GOOD	6	5	4	6	6	5	6	6	6	6	6	6	6	5	7	6	6	7	6	7	5	6	6	6	7	6	6
1	VIRUS SPREAD	nothing	2	nothing	Reduced risk perception	Protection	Safety	Inconvenience	Spread	Uncertainty	Isolation	Disruption	Loss	Resilience	In some Asian countries like Japan and South Korea, wearing face masks when sick or during seasonal flu outbreaks was already a common practice for cultural and public health reasons. Masks were associated with courtesy and social responsibility.	While case numbers have declined in some regions, others still face significant outbreaks. Perceptions of risk and the need for mask-wearing vary accordingly.	1	Surgical masks are widely available and relatively inexpensive compared to other options. This makes them accessible to a large portion of the population.	1	Surgical masks are relatively lightweight and breathable, making them comfortable to wear for extended periods. This is especially important for people who find other types of masks, like respirators, too restrictive.	1	Surgical masks are effective in blocking large droplets and splashes that may contain germs, bacteria, and viruses. While they don't offer the same level of protection as respirators like N95s, they can significantly reduce the risk of transmission in many situations.	6	5	6	6	4	5	5	6	6	6	5	5	5	7	5	6	5	4	2	2	2	2	6	5	6	6	6
1	pollution	NO	2	COVID-19	COVID-19	Protection	Safety	COVID-19	Outbreak	Contagious	Global	Virus	Quarantine	Health	Face masks were mostly associated with medical professionals or situations with a high risk of airborne diseases.	By covering the nose and mouth, face masks act as a physical barrier and can help reduce the risk of inhaling or exhaling infectious droplets.	2	GOOD	2	These masks offer a way for individuals to express their personal style while adhering to safety guidelines.	2	Fashion masks with a variety of designs and colors have become increasingly popular during the COVID-19 pandemic.	4	5	6	4	4	5	6	5	5	4	5	4	5	6	5	6	6	5	5	6	6	7	4	5	6	5	4
1	SAFETY	YES	1	YES	YES	SAFETY	PROTACTION	NFL	COVID 19	SARS	Bubonic	LOCKDOWN	MASK	SAFETY	offering protection from pollution and allergens.	offering protection from pollution and allergens.	3	IT IS SAFER MORE THAN OTHERS	3	IT IS SAFER MORE THAN OTHERS	3	IT IS SAFER MOER THAN OTHER	5	5	6	6	6	7	5	6	6	5	6	6	5	6	6	5	6	5	6	5	6	5	6	5	6	5	6
1	The key reason why I had worn a face mask before COVID-19 was for protection against air pollution or allergens.	The key reason for no experience to wear a face mask before COVID-19 could be that I didn't live in an area with high air pollution or allergens, or that I didn't have any respiratory issues that required the use of a face mask. Additionally, I may not have been aware of the benefits or necessity of wearing a face mask for certain circumstances.	1	I feel more protected and safe from other illnesses.	It has become a habit and a part of my daily routine.	Breathable	Necessity	Protection	Contagion	Outbreak	Devastation	quarantine	masks	Pandemic	Before the COVID-19 pandemic, I rarely thought about wearing a face mask. It was not a normal practice in my daily life and I only associated it with people who were sick or in medical settings. I never thought I would have to wear a face mask regularly or that it would become a necessary part of my daily routine. However, my perception has completely changed since the pandemic and I now see wear…	Currently, I believe wearing a face mask is essential in helping prevent the spread of COVID-19. It has become a necessary precaution in any public setting and I feel a sense of responsibility to wear one to protect myself and others. I also see it as a way to show empathy and consideration for the well-being of those around me. Wearing a face mask has become a habit and I feel uneasy when I forg…	1	I generally wear a disposable surgical mask in regular life.	1	I prefer wearing a reusable cloth face mask in regular life. There are a few reasons for this.	2	The main reason for using this mask was because it provided better protection against the virus compared to cloth masks. Surgical masks have multiple layers and a more secure fit, which can prevent the spread of respiratory droplets that may contain the virus.	5	6	5	4	7	5	3	5	5	6	5	5	6	7	5	6	7	5	6	5	6	7	5	7	5	6	5
1	I wear a mask because of the air pollution.	It was not much needed then.	1	I am constantly wearing a mask to protect myself from deadly diseases like covid-19.	Most of the time I feel very uncomfortable wearing it.	PROTECT	PURIFY	SAGE	COVID 19	DANGER	FEAR	PANDEMIC	DEADLY VIRUS	MASK	Pre-Covid-19, mask wearing was often less common. AIR POLLUTION and masks are required when visiting hospitals.	After covid-19 I think wearing face mask is very mandatory and safe. It is important for everyone to wear a mask to protect us from various diseases in the future.	2	Because it is easy to wear, safe and a bit beautiful to look at.	2	Overall I definitely like this fashion mask comparing the price.	3	I thought it would protect me from illness.	5	6	6	6	4	7	5	5	7	6	7	6	7	7	6	5	5	6	6	6	7	7	7	5	7	7	7
1	The Protects You From Poor Air Quality.	The disability that precludes wearing a mask	1	To protect yourself and others from COVID-19	The not believing that masks are effective or the belief that they are an impingement on their freedoms.	surgical masks	safty	health	community spread	transmission	fatality rate	health body	mask	food	The offering protection from pollution and allergens.	The wearing a mask can help protect you and those around you.	2	this is very comfortable.	2	price is low and comfortable	2	very safe	5	6	7	6	5	5	6	6	5	6	5	5	6	6	5	6	5	6	6	5	6	6	6	5	6	5	6
1	dust allergy	pollution	1	protect for me	wheezing problem	Protects You From Poor Air Quality.	Reduces Exposure to Allergens.	Protects Immunocompromised.	uncertainty	altered daily routines	financial pressures	job loss and financial instability	illness	grief	Other than preventing or lowering the risk of germ spread, wearing a mask is beneficial in offering protection from pollution and allergens.	offering protection from pollution and allergens.	3	comfort	3	good quality	3	protect	6	5	6	5	6	6	1	6	6	5	6	6	5	6	5	7	5	6	7	6	6	5	4	5	6	5	6
1	generally for pollution and safety	generally for pollution and safety	1	for avoid of virus sperading from others and for safety	N/A	Safety	corona virus	N-95	Lockdown	Restriction	one arm distance	Lockdown	Isolation	Safety	for safety	Wearing mask generally is safety	3	It is more safety than other mask	1	it is best use for regular life for safety	3	for safety	6	5	6	5	6	7	6	7	6	7	6	6	5	6	6	5	6	7	6	6	5	6	6	5	7	6	6
2	N/A	N/A	1	For safety from virus	N/A	Safety	N-95	covid-19	Locdown	isolation	Safety	Isolation	Sfety	Lockdown	I think people do not aware about wearing mask	For Safety form virus	1	One time usable mask is better to avoid from virus attack	1	One time usable mask is better to avoid from virus attack	1	One time usable mask is better to avoid from virus attack	6	5	6	5	6	6	5	6	6	5	6	6	6	6	6	5	5	6	6	5	6	6	6	5	6	5	6
2	N/A	N/A	1	For safety	N/A	safety	covid	N-95	Lockdown	isolaton	Mask	isolation	lockdown	safety	N/A	for safety	1	One time usable mask is better to avoid from virus attack	1	One time usable mask is better to avoid from virus attack	1	One time usable mask is better to avoid from virus attack	6	5	6	6	5	6	6	6	6	5	6	6	5	6	6	5	6	7	6	5	6	6	6	6	5	6	5
1	Keep me from spreading germs	a medical condition	1	yes	yes	safty	protect	reduce	fear	death	workless	danger	injection	safety	mask is important way of people	more comfortable to wear the mask	1	one time use	1	easyly have that	3	highly proteted mask	6	6	6	5	6	6	5	5	6	6	6	6	6	6	6	6	5	7	6	6	7	6	6	6	6	6	6
1	generally for pollution and safety	generally for pollution and safety	1	for avoid of virus sperading from others and for safety	N/A	Safety	corona virus	N-95	lockdown	isolation	mask	mask	lockdown	isolation	N/A`	for safety	1	One time usable mask is better to avoid from virus attack	1	One time usable mask is better to avoid from virus attack	1	One time usable mask is better to avoid from virus attack	6	5	6	5	6	6	5	6	6	5	6	6	6	6	6	5	6	6	6	5	6	6	6	5	6	6	5
1	Protects You From Poor Air Quality. Wearing a mask can protect your respiratory system and general health when there is bad air quality because of pollutants	A medical condition, Mental health condition,	1	Even if your personal risk is not high, you might want to wear a mask in more situations than usual to avoid infection and protect loved ones	physical discomfort and negative effects,	facial mask is a creamy or thick pasted mask applied to the face for cleansing or skin	Make sure the mask fits to cover your nose, mouth and chin	Prevents You From Getting Sick	Health	Crisis	Contagion	Pandemic	Respiratory	Coronavirus	As a machine learning model, I don't have personal thoughts or opinions. However, before the COVID-19 pandemic, the general consensus among health experts was that wearing face masks was primarily recommended for individuals who were sick to prevent the spread of respiratory droplets	Masks have been an effective tool for preventing the spread of COVID-19 and its variants,	2	Preventing Respiratory Droplet Transmission: COVID-19 primarily spreads through respiratory droplets when an infected person talks, coughs, or sneezes. Wearing masks helps to contain these respiratory droplets, reducing the risk of transmission to others.	1	Protecting the Wearer: While not as effective as some other preventive measures like vaccination, wearing masks can offer a level of protection for the person wearing them. Masks can help filter out some respiratory droplets containing the virus, reducing the likelihood of inhalation.	2	Mask-wearing is considered a collective effort to protect the community. It is particularly important in settings where physical distancing may be challenging, such as public transportation, crowded indoor spaces, or areas with high infection rates.	6	7	6	6	7	6	6	7	6	5	6	6	6	7	5	6	5	6	6	6	7	6	5	6	5	6	6
1	People in certain industrial settings, such as construction or manufacturing, wore masks to protect themselves from inhaling airborne particles, dust, or harmful substances.	Traditional face masks, such as cloth masks, were not highly effective in preventing the transmission of respiratory viruses like influenza in everyday situations. These masks were more commonly used in healthcare settings or by individuals who were sick to prevent the spread of their own respiratory droplets.	1	People who were sick or experiencing symptoms of respiratory infections, such as the flu or a cold, might wear a mask as a courtesy to others to prevent the spread of their own respiratory droplets.	Some individuals may continue wearing masks as a sign of consideration and respect for the health and well-being of others, especially in situations where close contact is unavoidable.	Protection	Respiratory	Containment	Widespread	Contagious	Crisis	Coronavirus	Pandemic	Respiratory	the attitude toward wearing face masks was shaped by cultural practices, prevalence of infectious diseases, and the perceived effectiveness of masks in preventing the transmission of respiratory illnesses. The COVID-19 pandemic dramatically changed these perceptions as public health guidelines shifted to recommend widespread mask-wearing to reduce the spread of the virus, leading to a significant…	Factors such as personal comfort, convenience, and the practicality of mask-wearing influenced individual decisions. Some people found masks to be a minor inconvenience, while others were willing to continue wearing them for the perceived public health benefits.	3	Individuals with underlying health conditions, compromised immune systems, or heightened susceptibility to respiratory infections may choose N95 masks for the extra layer of protection they offer. This can be especially relevant during flu seasons or in areas with high air pollution.	4	Natural fabrics like cotton are known for their breathability and comfort. Homemade masks made from these materials are often more comfortable for extended wear, making them a practical choice for daily use.	3	N95 masks are designed to filter out at least 95% of airborne particles, including respiratory droplets that may contain viruses or other pathogens. Some individuals may opt for N95 masks because they believe these masks provide a higher level of protection compared to other types of masks.	6	5	4	5	5	4	5	5	6	5	5	5	6	5	6	5	4	5	3	4	3	4	6	5	6	5	5
1	mask	mask	1	mask	mask	good	safe	product	good	safe	product	good	safe	product	good	good	2	good	2	good	2	good	5	5	5	6	6	6	6	6	5	5	5	5	5	5	5	5	5	5	6	6	6	6	5	5	6	5	6
1	for safety	it doesnt follows by humans	1	safety purpose	na	safety	corona	disease	isolation	transmission	incvubation	PERIOD	VENTILATOR	FATALITY RATE	Other than preventing or lowering the risk of germ spread, wearing a mask is beneficial in offering protection from pollution and allergens. Here's what else you need to know, including who should wear masks, which masks work best, and how to wear your mask properly	Masks have been an effective tool for preventing the spread of COVID-19 and its variants, like the omicron variant. Masks also help protect against influenza and other viruses. The Centers for Disease Control and Prevention (CDC) recommends personal masks in public when hospital admissions from COVID-19 are high	1	for safety	1	because its cost	1	one use	4	6	5	4	5	5	6	5	5	4	5	5	6	5	5	6	5	5	6	5	6	6	5	4	5	6	5
1	generally for pollution and safety	generally for pollution and safety	1	for avoid of virus sperading from others and for safety	N/A	Covid	N-95	Safety	isolation	lockdown	safety	lockdown	mask	isolation	N/A	for safety	1	One time usable mask is better to avoid from virus attack	1	One time usable mask is better to avoid from virus attack	1	One time usable mask is better to avoid from virus attack	6	5	6	6	5	7	6	5	6	6	6	6	5	6	6	5	6	5	6	6	5	6	6	5	6	6	5
1	POLLUTION	DISCOMFORT	1	POOR AIR QUALITY	VACCINATION	SAFETY	AIR POLLUTION	AWARENESS	VACCINATION	PREVENTION	SOCIAL DISTANCE	FACE MASK	VACCINATION	SOCIAL DISTANCE	I FEELS LITTLE BIT DISCOMFORT BEFORE THE COVID 19.AFTER THE REGULAR USE IT IS PREVENT FROM SICK	KEEPS YOU FROM SPREADING GERMS	3	IT IS MORE SAFETY THAN OTHER MASK	1	CONSIDERING THE PRICE SURGICAL MASK IS LOW,USE AND THROW ONE	3	DOCTORE RECOMMENDED ONE,HIGHLY PREVENT FROM COVID	5	6	4	5	7	7	5	6	7	7	7	6	6	6	5	5	5	5	6	5	6	6	6	3	6	6	5
1	Protects Immunocompromised.	Reduces Exposure to Allergens	1	To protect yourself and others from COVID-19, CDC continues to recommend that you wear the most protective mask you can that fits well and that you will wear consistently.	A medical condition,	She is not wearing a face mask.	cloak and disguise	Face masks and physical distancing would be required.	A disease outbreak is endemic when it is consistently present but limited to a particular region.	A pandemic is the worldwide spread of a new disease,	such as a new influenza virus or the coronavirus that causes COVID-19.	It can be very contagious and spreads quickly.	Cough	Fever or chills	Other than preventing or lowering the risk of germ spread, wearing a mask is beneficial in offering protection from pollution and allergens.	Masks have been an effective tool for preventing the spread of COVID-19 and its variants,	2	The mask helpful	1	the mask use helpful	1	very like is mask	5	6	7	5	6	7	5	6	5	6	7	5	6	7	5	6	7	6	6	7	5	6	5	6	7	5	6
2	no	my face is very nice look	1	very safe	no	safe	Wearing a mask can protect	Spreading	Most of the diseases posing	Malaria, for example	influenza virus	Over one million people have died	flu, or pneumonia	lungs and respiratory	germ spread	most effective tools	4	my homemade is hand mask	4	clouth i desien i my interest	4	easy wash	4	5	5	5	7	6	5	3	3	5	6	6	7	5	3	5	6	7	4	7	6	7	4	7	6	6	6
1	other than preventing or lower the risk of germ spread wearing a mask of germ spread	Face mask use and social transformation	1	while masks alone are not a 100% safeguard against diseases and transmission	diseases decreased	covid-19 fear	mask	handwash	social distance	food	work from home	hand clean	health	world wide death increased	use and through mask	personal choice	1	lightweight	1	air circulate	1	easy carry the mask	6	7	6	5	6	6	6	6	5	5	5	6	6	6	6	7	6	6	6	6	6	6	6	6	6	6	6
2	I didn't	No need to wear one.	2	I will not be wearing one.	If I do not have to wear a face mask, I will not use one.	Covid	Safety	sick	Stay home	mask	sick	Mask	Sick	Death	I never thought about using a face mask before Covid	If I do not have to wear a face mask I will not wear one. If hospital or companies want you to wear one before entering there building, The I will have to wear a mask.	4	I have to match my outfit.	4	I don't go out during a Covid out break, when I have to go out I will wear a mask that I made or ordered on-line.	4	It worked for me and I never got covid.	5	6	7	7	7	7	7	7	7	7	7	4	4	5	6	6	6	6	5	6	6	6	7	7	7	7	7
1	air was too dry	keep moist in my mouth and nose	1	If I am sick	If I am sick	protective	safe	prevent	thread	serious	bad	scary	thread	suffer	Nothing particular	nothing particular	1	effective and clean	1	budget friendly	3	protective	6	6	6	6	6	7	7	6	6	5	6	4	5	7	6	2	5	6	2	2	2	2	6	6	6	7	6
2	I have not.	No need and it is not a part of the previous COVID 19 culture.	1	I found that I got sick less by wearing a mask and increased hand washing.	I will wear a mask.	Protection	health	compassion	Scary	Sickness	Disease	Disease	Sickness	pandemic	I never thought about it. it was never really necessary and not many people in my culture did so.	Why not. It is a very minor inconvenience that will help protect myself and others.	3	As I understand these offer the most protection.	3	They offer the most protection	3	They offer the most protection.	5	7	4	7	7	7	7	5	6	6	7	7	7	7	6	6	6	6	6	6	6	4	6	6	6	6	6
2	Didn’t wear one before CoVid.	Never need it before CoVid.	2	In case I have to interact with someone who might be sick.	Because as a shut-in from even before Co-Vid, I don't go out and visitor are very rare for me to interact with.	Preventative	Itchy	Slimy	World-Ending	Scary	Deadly	Viruses	Shut Down	Pandemic	Wearing a mask was mostly for those working with the sick or in Hospital. Never thought we'd need it in our daily lives.	Only when necessary.	1	Cheapest option	1	Cheapest option	1	Cheapest option	6	7	6	7	7	7	6	5	5	4	7	6	7	6	7	5	7	5	3	2	1	1	7	6	7	6	5
1	from dust	self hygine	1	immume	none	covid-19	dust	ailery	lockdown	isolate	hoilday	disaster	nature	holidays	for my safety precausions	It's totally fine to keep wearing a mask if it makes you feel more comfortable	1	easy to use	1	one use	1	one use	5	6	7	6	5	6	5	4	4	5	6	4	5	6	6	5	4	6	6	5	6	5	6	5	4	5	6
1	Pollen and dust	N/A	2	Not permanent use	I will, when needed	Pandemic	COVID	Exhale	COVID	Flu	Smallpox	ER	Mask	CDC	Positive, I thought when people wanted to wear one, it was a sensible idea	Very Positive, I appreciate that people want to protect themselves and others by wearing masks	2	This is the mask that my wife gave to me for use	2	I am used to wearing this mask, and it's the one I have ready in the car	2	This is the mask that was given to me and is the one that is stored in the car	5	5	2	5	5	7	7	2	5	5	7	4	6	7	5	2	4	4	5	5	5	5	5	4	5	5	4
2	N/A	My health	2	Protection	Not a big deal	Health	Protection	Mandate	Fear	Shock	Stress	Scared	Fear	Spread	Paranoid	Not a big deal	1	I like the comfort	2	The price	1	the comfort	4	7	4	5	5	4	5	6	4	4	4	5	5	5	5	5	5	5	4	4	4	6	4	4	4	4	4
1	pollution	no	1	COVID-19	COVID-19	Protection	Preventive	Safety	Contagious	Outbreak	Measures	Virus	Quarantine	Vaccine	pollution	Safety	1	face masks, are commonly used in healthcare settings, particularly by healthcare professionals during surgeries and procedures.	1	During the COVID-19	1	the general public as well.	4	5	5	7	7	6	5	5	4	6	7	4	5	6	6	6	5	5	5	6	5	6	4	6	7	7	4
1	SIMPLY CLOSED MY FACE MASK	NO	1	WEAR THE MASK AFTER COVID-19 MY SAFETY	NO	OFFERING PROTECTION FROM POLLUTION AND ALLERGENS	SHE IS NOT WEARNING	HEALTH SAFETY	OUTBREAK THAT IS RAPIDLY	SPREADIND INA LIMITED REGION	MULTIPLE REGIONS ACROSS THE GLOBE	IT IS THE LARGEST CATEGORY FOR AN RNA VIRUS	PNEUMONIA	LIKE OTHER RESPIRATORY	GOOD DECISION	I THINK GOOD FOR FACE MASK	3	N95 GOOD MASK	3	GOOD	3	GOOD	6	6	7	5	6	7	5	7	6	7	5	5	6	7	7	6	5	6	6	6	6	7	7	5	5	6	7
1	FEEVER	SAINAS	2	NO	NO	MASK	CHILD SPECIAL,MASK	HELMET	COVID 10	DENGU FEVER	KALARA	MASK	CLEASN WASHOMG	INJUCYUO	VERY BEST	VERY BEST IDEA AND CLAVER	1	DAILY USE,SIMPLE	3	HIHG RANGE	1	VERY EASY	5	6	5	6	7	5	6	6	5	6	7	5	4	5	5	6	7	6	6	7	5	6	5	5	6	7	5
1	Medical purpose	Emergency room	2	breathing issues	uncomfort	prevention	oppression	disease	tablets	test	diseases	test	hospitalisation	infection	part of personal protective equipment	masks can trap fluid droplets that exit the mouth while you're speaking	1	a form of disguise or concealment	1	suggestable	3	commmon	5	6	5	4	5	6	5	5	5	5	6	6	6	5	6	6	6	5	5	5	6	6	5	6	5	6	4
2	I di not wear one	I have nevr seen anyone wearing one	1	To stay healthy	I will always wear one	germs	healthy	breathe	sick	bad	covid	bad	virus	mask	I would have if I had known to	to keep healthy	1	they costs less	1	safer	1	safe and less costly	6	7	6	7	7	7	7	7	6	7	7	6	6	6	7	7	7	7	6	6	6	6	7	7	7	6	6
1	Before the COVID-19 pandemic, people primarily wore face masks for reasons related to occupational safety, personal health, or cultural practices.	Before the COVID-19 pandemic, face masks were primarily used in specific settings and for particular purposes.	1	Individuals with underlying health conditions, weakened immune systems, or those who are more susceptible to respiratory infections may choose to continue wearing masks as an extra layer of protection against various pathogens.	Individuals may perceive the overall risk of contracting or spreading respiratory illnesses, including COVID-19, as significantly reduced. This perception may be based on factors such as vaccination rates, lower infection rates, or effective public health measures.	Protection	Respiratory	Pandemic	Global	Contagious	Health crisis	Coronavirus	Pandemic	Respiratory	Before the COVID-19 pandemic, the general sentiment and perception of wearing face masks varied across different cultures and regions. In many Western countries, wearing face masks in public spaces was not a common practice among the general population. Masks were typically associated with specific contexts, such as healthcare settings or certain industrial occupations where protection against ai…	he acceptance of mask-wearing was influenced by the evolving understanding of the virus, vaccination rates, and public health recommendations. In regions where mask mandates were in place or recommended, people generally complied with these guidelines to protect themselves and others.	4	Homemade masks made from natural fabrics, such as cotton, are often considered more environmentally friendly compared to disposable masks. Using reusable cloth masks reduces the amount of single-use plastic waste generated by disposable masks.	1	N95 masks are designed to filter out at least 95% of airborne particles, including respiratory droplets that may contain viruses or other pathogens. Some individuals may opt for N95 masks because they believe these masks provide a higher level of protection compared to other types of masks.	4	Natural fabrics like cotton are known for their breathability and comfort. Homemade masks made from these materials are often more comfortable for extended wear, making them a practical choice for daily use.	6	7	6	5	6	5	4	5	6	5	5	6	7	6	7	6	5	5	2	4	3	3	5	4	5	4	6
1	for safety	it doesnt follows by humans	1	safety purpose	NA	safety	corona	disease	isolation	transmission	incubation	period	ventilator	fatality rate	Other than preventing or lowering the risk of germ spread, wearing a mask is beneficial in offering protection from pollution and allergens. Here's what else you need to know, including who should wear masks, which masks work best, and how to wear your mask properly	that wearing face masks can protect people's health and slow the spread of COVID-19. That's because the novel coronavirus can be transmitted through respiratory droplets that get into the air from sneezing, coughing or even speaking.	1	for safety	1	because it is best in low cost	1	for one use	4	5	6	5	4	4	5	5	5	5	6	5	6	6	4	5	6	5	6	5	6	6	5	5	5	6	7
1	lungs infection	no issues	1	dust allergy	nothing	safety	bad smell	travelling	fear	hospital	treatment	cold	fever	mask	safe to our health	safe from spreading disease	1	full prevention	1	less price	1	safety	6	6	5	6	6	5	6	6	6	6	6	5	5	6	6	6	5	6	6	6	4	5	5	5	6	6	6
2	i never wore one	there was no life threatening airborne virus	1	to stay safe. i will probably always continue to wear on in stores.	i would still wear one after covid cause new strains keep turning up	covid	sick	safe	sick	danger	earth	danderous	china	virus	i never wore one	it is good to wear one now cause new strains keep popping up	2	it is quick and easy to find and buy in the n94 is out of stock	3	it is the most safe and effective	3	the most effective	4	6	6	4	6	6	6	6	6	6	6	6	6	6	7	7	7	6	7	7	5	4	7	7	7	7	7
1	environmental pollution	no	1	air pollution	no	safe	good	comfortable	panic	stress	family	dangerous	threading	safe	face mask was very important covid-19 pandemic.	air pollution	3	it's very safe	3	very effective	3	ssafety	6	5	5	6	7	6	3	5	5	6	6	6	5	6	6	7	6	7	6	5	7	6	6	5	7	6	7
1	Spread flu	its not necessary to wear mask before covid	1	because wear mask my safety.	safe guard again diseases and transmission	safety	covid	distance	death	fear	dangers	flu	spread	injection	the moral skin caring and spreading issues.	reduces exposure allergens getting sick	3	fully covered	3	natural fabric	3	it was double clothing	5	6	6	5	6	6	6	5	5	6	6	5	7	6	4	5	5	6	6	7	6	7	5	6	5	6	6
2	sometimes there is pollution on the place or i have fever	there is no need for that	2	there is still probability that the corona may return	the Covid was over so it does not compulsory	corona	safety	lockdown	danger	crowd	hospital	fear	quarantine	death	it was not compulsory and there is no need for that	now it also not compulsory but some wear it and some not	1	it is very cheap and available in all places	1	it is very cheap and use and throw policy	1	it is easily affordable and cheap in prize	6	5	7	6	4	6	5	6	5	4	6	6	7	5	6	7	7	5	5	6	7	6	6	7	7	6	5
2	Wearing a mask plays a role in preventing the spread of germs, but it can also be a way to protect yourself from allergens, pollutants, and more.	Health and care workers caring for COVID-19 patients should wear a respirator or a medical mask	1	PROTECT THE POLUTION AND FEVER	NO REASON	COVID 19	AIR POLLUTION	VIRUS	SOCIAL DISTANCE	ESSENTIAL	NEW NORMAL	Hand hygiene	Flattening the curve	Anti-viral medicines	Wearing face masks is recommended as part of personal protective equipment (PPE) and as a public health measure to prevent the spread of COVID-19 pandemic. Their use, however, is deeply connected to social and cultural practices, and has acquired a variety of personal and social meanings.	ITS SAFE FOR ME AND SURROUNDING PEOPLE	3	IT'S MORE PEOTECTED	2	ITS BUY TO EASILY	1	PROVIDED BY HOSPITALS	5	6	5	6	7	7	7	7	6	6	7	7	7	7	5	5	5	6	3	4	3	4	6	4	4	4	4
1	Reduces Exposure to Allergens	Protects Immunocompromised.	2	Keeps You From Spreading Germs	Prevents You From Getting Sick	breathing issue	healthy	fear	isolation	community spread	transmission	cold	pneumonia	lungs	Other than preventing or lowering the risk of germ spread, wearing a mask is beneficial in offering protection from pollution and allergens. Here's what else you need to know, including who should wear masks, which masks work best, and how to wear your mask properly.	It's totally fine to keep wearing a mask if it makes you feel more comfortable	2	6	2	6	2	6	6	5	6	7	6	5	6	7	6	7	5	5	6	7	6	5	6	7	6	7	6	5	5	6	7	6	5
1	THE REASON FOR WEARING A MASK IS TO PREVENT THE SPREAD OF DISEASE	CORONA VIRUS	1	TO PREVENT THE SPREAD OF CORONA	NO	SECURITY	WEAR	FEARLESS	FEAR	DEATH	LACKTOWN	FEAR	DEATH	ALONE	PRODUCTIVE	SAFETY	1	SECURITY	2	I LIKE IT	3	PRODUCTIVITY	6	5	6	6	7	6	5	6	5	6	6	5	6	6	5	6	6	7	6	7	6	6	5	6	6	6	5
2	na	never used one	2	depending what happens later	too uncomfy	mandate	protect	cold	large	sick	mask	sick	cough	sneeze	very uncomfy	don't need one	2	more reuseable	2	reusable	2	reuseable	6	6	5	6	6	6	6	6	6	6	6	6	6	6	6	6	6	6	4	4	4	4	6	6	6	5	5
2	Reduces Exposure to Allergens	Protects Immunocompromised.	2	Keeps You From Spreading Germs	Prevents You From Getting Sick	breathing issue	healthy	fear	isolation	community spread	transmission	cold	pneumonia	lungs	Other than preventing or lowering the risk of germ spread, wearing a mask is beneficial in offering protection from pollution and allergens. Here's what else you need to know, including who should wear masks, which masks work best, and how to wear your mask properly.	It's totally fine to keep wearing a mask if it makes you feel more comfortable	2	Black optic exterior package - Singleframe® grille mask, front and rear bumper inserts, roof rails, and trim around exterior side windows.	2	Start with a direct opener. ...	2	3	6	5	7	6	5	6	7	5	5	6	7	5	6	7	5	6	7	5	6	7	6	5	5	6	7	5	6
2	safety	no awarness	1	feel safe	not spread	safe	not spread	surrounding	fear	mask	spread	fear	safe	spread	face mask is very useful in pandamic peiod.control spread	safe my surrounding people	3	it is very safe and secure	3	not spread in your surroundings	3	very secure	6	6	6	6	6	6	6	6	6	6	6	6	6	6	6	6	6	6	6	6	6	6	6	6	6	6	6
1	During the COVID-19 pandemic, the use of facemasks seems to be an accepted procedure worldwide although a scientific discussion	is going on up to now	1	Why should people wear masks? Wearing a mask reduces the spread of respiratory illnesses within the community by reducing the number of infectious particles that may be inhaled or exhaled. These particles may be spread when an infected individual talks, sings, shouts, coughs, or sneezes	The top 3 reasons for opposing public mask wearing were physical discomfort and negative effects	safety	save me	corona virus	kill the people	danger	corona virus	kill the people	dander	corona virus	Wearing face masks is recommended as part of personal protective equipment and as a public health measure to prevent the spread	for pollutio problems	1	safety for our	1	safety	1	because that mask is very safety our life	5	6	7	6	5	6	7	6	6	5	6	6	7	6	6	5	6	7	6	5	6	6	6	7	6	5	6
2	Reduces Exposure to Allergens	Prevents You From Getting Sick	2	Keeps You From Spreading Germs	Protects Immunocompromised	breathing issue	healthy	fear	isolation	community spread	transmission	cold	pneumonia	lungs	Other than preventing or lowering the risk of germ spread, wearing a mask is beneficial in offering protection from pollution and allergens. Here's what else you need to know, including who should wear masks, which masks work best, and how to wear your mask properly	It's totally fine to keep wearing a mask if it makes you feel more comfortable	2	6	2	3	3	2	5	6	7	6	5	6	7	5	5	6	7	5	6	7	6	5	6	7	6	7	6	7	6	5	6	7	6
1	safty	NO RICK	1	VERY SAFTY	NO REASON	CLOVES	HANWASH	MASK	COVID 19	DENGU	KALARA	MASK	INJECTION	HAND WASAH	NO REASON	VERY SAFTY	1	DAILY USE	1	LOWEST PRIZE	1	LOWEST PRIZE	5	6	7	6	5	6	7	6	5	6	7	7	6	5	7	6	5	6	6	7	6	5	6	5	7	6	7
1	Reduces Exposure to Allergens	Prevents You From Getting Sick	2	Protects Immunocompromised	Keeps You From Spreading Germs	breathing issue	healthy	fear	isolation	community spread	transmission	cold	pneumonia	lungs	Protects You From Poor Air Quality. Wearing a mask can protect your respiratory system and general health when there is bad air quality because of pollutants	he first facial mask was invented in Ohio, United States, during the 19th century by Madame Rowle	3	save our life	3	save our life	3	save our life	6	5	6	7	6	5	6	7	6	5	6	6	5	6	6	5	6	7	6	5	6	7	5	6	7	6	5
1	offering protection from pollution and allergens.	A medical condition	1	beneficial in offering protection from pollution and allergens.	Mental health condition	DOCTOR	SPREAD	hydrate skin	isolation	community spread	transmission	contagious	spreads quickly	symptoms	preventing or lowering the risk of germ spread, wearing a mask	Masks have been an effective tool for preventing the spread of COVID-19 and its variants	3	it was highly safe	1	recommended or in situations that you are required to do	3	wear the most protective mask that you'll wear regularly, fits well and is comfortable	6	5	6	5	4	5	6	5	6	5	6	5	6	6	6	7	6	6	6	5	6	6	6	7	6	7	6
1	safe	health	1	When hearing "Face mask," the top three words that might come to mind for some people could be: protection, safety, and prevention.	Regarding "COVID-19," common associations might include: virus, variants, and impact.	Contagion	safe	Public health crisis	Contagion	Global impact	Public health crisis	Contagion	Global impact	Public health crisis	Before the COVID-19 pandemic, face masks weren't a common sight in everyday life where I exist, except in specific contexts like certain medical settings or in places with high pollution levels. They were typically associated with healthcare professionals or sometimes with people in countries where mask-wearing was more culturally accepted as a preventive measure against illnesses or pollution.	I don't wear face masks myself, but I've observed how they've become a more common sight and an accepted practice in many places as a preventive measure against the spread of illnesses, not just COVID-19. The perception around wearing face masks has significantly changed post-pandemic. Many people view them as a responsible way to protect themselves and others from contagious diseases, not just f…	3	be safe	3	good	2	safe	6	6	6	5	6	5	6	6	5	6	7	5	6	5	4	5	6	6	5	6	6	6	5	6	7	6	5
1	the use of facemasks seems to be an accepted procedure worldwide although a scientific discussion	During the COVID-19 pandemic, the use of facemasks seems to be an accepted procedure	1	During the COVID-19 pandemic, the use of facemasks seems to be an accepted procedure	During the COVID-19 pandemic, the use of facemasks seems to be an accepted procedure	Focus on conversation	Materials and Methods	Ethics	Americans’ views and reactions to the COVID-19 pandemic.	he vast majority of Americans (89%) mentioned at least one negative	while a smaller share (though still a 73% majority) mentioned at least one unexpected upside	Social distance	Fomite ·	Epidemic & Pandemic & Outbreak	Wearing face masks is recommended as part of personal protective equipment and as a public health measure to prevent	Masks have been an effective tool for preventing the spread of COVID-19 and its variants,	2	good	2	good	2	good	6	6	6	6	6	6	6	6	6	6	6	6	6	6	6	6	6	6	6	6	6	6	6	6	6	6	6
1	safety	Reduces Exposure to Allergens	1	Keeps You From Spreading Germs	It is important to wear a mask or respirator when you are sick or caring for someone who is sick with COVID-19	N95	Cloth masks	Respirator masks	Viral respiratory diseases	coronavirus	West Nile	danger	alone	family	safety first	n95	3	best safety	4	home only	2	fashion	7	5	6	5	7	6	5	4	5	6	5	7	6	5	7	6	5	6	7	6	5	6	7	6	5	5	7
1	If I was sick or had a cold.	If I didn't want or need to wear one.	2	I will not continue to do so unless I am sick.	I don't like to wear them and they are hot and uncomfortable so I would not wear one after Covid unless I had a cold and was sick.	Health	Safe	Smart	Scary	Dangerous	Sick	Contagious	Deadly	Virus	I never thought about it unless I was sick so I only wore one to prevent others around me from getting sick. I've never liked wearing them but sometimes it is necessary.	I don't feel like I need to wear one anymore and since they are uncomfortable, I don't want to wear one now unless the rare occasion that I'm sick.	1	It is the most common and seems the most safe to prevent people or myself from getting sick facoring in it being more comfortable.	1	It is the most common and seems the most safe to prevent people or myself from getting sick factoring in it being more comfortable.	1	It was one of the most safe and common mask to wear as well as being comfortable.	6	7	5	7	7	7	6	4	6	5	7	6	6	7	7	6	6	5	7	7	6	6	6	7	6	7	5
2	nothing	no reason	2	I am not wearing	no reason	covid	pandemic	protection	covid	deaths	economy	deaths	econmy	lockdown	not needed	for more protection	1	disposable	1	convinient	1	convinent	5	7	6	5	6	6	7	7	7	7	7	7	7	7	7	6	7	7	6	6	6	6	7	7	7	7	7
1	avoid inhales polluted air	There is no need for this mask	1	Its suits me well and keeps me good	That is not my opinion	hide	good health	air purity	dead	vaccine	fever or headache	headache	corona	omicron	It will help to hide my face.	To prevent the covid-19	2	it fits me well	4	It feels much more safe	3	Help to inhale disease free	6	7	7	7	6	6	7	7	7	7	7	7	6	5	6	7	7	6	2	3	4	2	4	6	6	7	7
1	n some Asian countries, wearing masks was a common practice, especially during flu seasons or periods of elevated air pollution. This cultural norm was often followed to protect others from the wearer's respiratory droplets when the person was feeling unwell.	In many cultures, wearing face masks in public was not a common practice. It was more common in certain Asian countries where people might wear masks to protect others when feeling unwell, but this practice was not widespread globally.	1	It's important to note that, before the COVID-19 pandemic, the widespread use of face masks in everyday life, especially in non-occupational and non-healthcare settings, was not as common in many parts of the world. The global adoption of mask-wearing for the general public significantly increased during the COVID-19 pandemic as a preventive measure to curb the spread of the virus.	People may choose to wear masks to minimize the transmission of respiratory illnesses, such as the flu or common cold, even when they are not experiencing COVID-19 symptoms. This can be particularly relevant in crowded or high-risk settings.	Prevention	Respiratory	Covering	Global	Contagious	Health crisis	Coronavirus	Pandemic	Global	Before the COVID-19 pandemic, the perception of face masks was also influenced by the prevalence of infectious diseases in a particular region. In areas with lower rates of respiratory infections, the use of masks in daily life was less common and may not have been widely considered as a preventive measure.	In areas with low infection rates or where the impact of COVID-19 had diminished, some people might have felt less inclined to wear masks. Conversely, in regions experiencing surges in cases or dealing with new variants, there might be a continued emphasis on mask-wearing.	3	In situations where maintaining physical distance is challenging, such as crowded public transportation, airports, or large events, some people may choose to wear N95 masks to reduce the risk of inhaling respiratory droplets and airborne particles.	4	Homemade masks made from natural fabrics are more readily available and accessible, especially when there are shortages of medical-grade masks. This ensures that individuals can still protect themselves and others even in situations where medical-grade masks may be scarce.	3	uring outbreaks of infectious diseases or in regions with elevated transmission rates, some people may choose N95 masks as a preventive measure to reduce the risk of infection.	6	5	6	5	5	6	5	5	6	5	6	6	5	6	5	6	5	5	3	4	4	3	6	5	6	5	6
2	NONE	NO NEED TO WEAR IF WHAT WE WEAR GIVES SOME SPREASION FROM OTHERS	1	TO AVOID SPREADING VIRUS ISSUES AND BE SAFE FROM DISEASE	NONE	SAFETY	VIRUS	SPREADING	COVID	PANIC	SPREADING	DEATH	ILLNESS	FEAR	NO NEED TO WEAR IF WHAT WE WEAR GIVES SOME SPREASION FROM OTHERS	TO AVOID SPREADING VIRUS ISSUES AND BE SAFE FROM DISEASE	1	IT IS COMFORTABLE TO WEAR AND EASY TO MAINTAIN, DOES NOT HARM THE SKIN, AND IS HANDLE FREE.	4	It is reasonably priced.	3	IS MORE PRODUCT IN COMPARISON TO OTHERS	6	6	6	6	7	7	6	6	6	6	6	6	5	6	6	6	6	6	1	1	1	1	6	6	5	5	5
1	safety	yes	1	spread of respiratory illnesses	physical discomfort and negative effects, l	Face masks and physical distancing would be required.	Face masks and physical distancing would be required.	Face masks and physical distancing would be required.	Face masks and physical distancing would be required.	Face masks and physical distancing would be required.	Face masks and physical distancing would be required.	Face masks and physical distancing would be required.	Face masks and physical distancing would be required.	Face masks and physical distancing would be required.	Face masks and physical distancing would be required.	Face masks and physical distancing would be required.	1	useful safety	1	useful	1	useful	6	6	6	6	6	6	6	7	6	6	6	6	6	7	6	6	6	6	6	6	7	7	6	6	6	6	6
1	social distance	covid	1	social distance	covid	HEALTH	FAMILY HEALTH	SAFTY	SOCIAL DISTANCE	FOOD	WEARING MASK	SANITIZER	HAND WASH	VACCINE	NEAT AND CLEAN MASK AFTER USE THE MASK THROUGH THE MASK ITS FOR SAFTY PURPOSE	HEALTH CARE SUGESSION TO ONLY ONE TIME USE THE MASK FOR SAFTY	1	THIS FOR SAFE MASK	1	USE AND THROUGH THE MASK ANF SAFE MASK	1	WEIGHTLESS MASK	6	6	7	6	6	6	6	6	6	6	6	7	5	6	6	7	6	6	6	7	6	6	7	6	6	6	6
1	SAFE	YES	1	As of my last knowledge update in January 2022, I don't have personal experiences or decisions, and I don't make decisions or take actions. However, I can provide you with some common reasons why individuals might choose to continue wearing face masks even after the COVID-19 pandemic has subsided:	a 100% safeguard against diseases and transmission	Protection	Respiratory	Pandemic	Contagion	Health	Outbreak	Pandemic	Coronavirus	Lockdown	I don't have personal thoughts or opinions as I am a machine learning model created by OpenAI and don't possess subjective experiences or beliefs. However, I can provide information on the general perspectives regarding face masks before the COVID-19 pandemic. Before the pandemic, the use of face masks varied across cultures and situations. In some Asian countries, wearing masks was more common, …	As a machine learning model, I don't have personal thoughts, feelings, or opinions. However, I can provide information based on the context available up to my last update in January 2022. As of that time, wearing face masks during the COVID-19 pandemic was widely recommended by health authorities as an effective measure to reduce the transmission of the virus. The guidance on mask-wearing varied …	1	As of my last update in January 2022, the reasons for wearing face masks during the COVID-19 pandemic were based on several key factors supported by public health experts and authorities. It's important to note that the situation may have evolved, and guidance may have changed since then. As of that time, the reasons for wearing face masks included:	3	N95 masks are designed to filter out at least 95% of airborne particles, including small respiratory droplets containing viruses and bacteria. This high level of filtration is crucial for preventing the spread of infectious diseases.	3	N95 masks are particularly effective in protecting against respiratory viruses, such as influenza and SARS-CoV-2 (the virus that causes COVID-19). The mask's filtration capabilities help reduce the risk of inhaling or exhaling infectious particles.	5	6	6	7	7	7	6	7	7	6	6	6	5	6	7	5	6	7	7	6	6	7	5	6	7	6	7
1	I used to wear it during my work as it involves little and tiny dust particles mixed in environment.	NA	1	Just to prevent myself from other harmful airborne diseases.	NA	Prevention.	Safety	Covid-19	China	Quarantine	Corona Virus	Mask	Sanitizer	Gloves	Just to protect myself from dust and inhale good amount of air.	Strictly to prevent myself from other harmful airborne diseases.	1	They are lite, soft and comfortable.	1	They are cheap.	1	They seem to be more protective,.	6	6	6	6	6	6	6	6	7	7	7	6	6	6	6	6	6	6	7	5	2	5	6	6	6	6	6
1	lab practices	nothing	1	during lab work	nothing	uncomfortable	irritable	worst	lockdown	death	worst	worst	corona	RNA	ITS THE WORST COMBINATION WITH GLASSES	WORST	1	LESS IRRITABLE	1	NOTHING	3	QUALITY	4	6	6	7	5	5	6	5	6	5	5	6	5	6	4	7	6	6	6	5	5	6	5	6	6	6	6
1	PRODUCTION FOR POLLUTION AND ALLERGENS	NO SOLID CULTURE	1	PRODUCTIVE MYSELF FROM THE VIRUS	NOTHING	PRODUCTION	SAFETY	FEARLESS	FEAR	ISOLATE	DEAD	SPREAD	VIRUS	HARD MOMENTS	PREVENT THE SPREAD OF CORONAVIRUS	MYSELF CARE ONLY	4	COMFORTABLE TO ME	4	NO SKIN ALLERGY	4	COMFORTABLE TO ME	6	7	5	6	6	7	6	6	5	6	6	6	7	6	6	7	6	7	6	7	6	6	6	6	6	7	6
1	spread the disease	safty	2	no	no	safty	style	pollution safty	new disease	new influenza virus	coronavirus	danger	kill humans	disease	disease not spread	safty for all disease	1	beause that mask is very safty our heqalth	1	beause that mask is very safty our heqalth	1	beause that mask is very safty our heqalth	6	7	6	5	6	5	6	6	6	5	6	6	5	6	6	5	6	5	6	5	6	5	6	7	6	5	6
1	spread disease	for safty	1	safty	now safe	hospital	safty	disease not affect me	rapidly spreading	disease outbreak	spreading to multiple regions	danger	death	spreading disease	Wearing face masks is recommended as part of personal protective equipment and as a public health measure to prevent the spread	It's totally fine to keep wearing a mask if it makes you feel more comfortable	1	safty of disease	1	daliy onece time use for safty	1	safty ..not spread the disease	6	5	6	7	6	5	6	5	6	5	6	6	5	6	6	5	6	7	6	7	6	7	6	5	6	7	6
1	The key reason people might have worn face masks before COVID-19 could be for protection against air pollution, allergies, or in certain healthcare settings to prevent the spread of illness or protect oneself from exposure to germs.	Before COVID-19, some individuals might not have had any experience wearing face masks simply because there wasn't a widespread societal need or recommendation to do so. In many cultures, the use of face masks wasn't common outside of specific contexts like healthcare settings or certain environmental conditions. The absence of a perceived threat or necessity might have been the primary reason fo…	2	Continuing to wear a face mask post-COVID-19 might stem from personal comfort, a desire for extra protection against illnesses or airborne pathogens, or adherence to public health guidelines. Some individuals may also continue wearing masks to safeguard vulnerable individuals or due to lingering concerns about potential infection or exposure in certain crowded or enclosed settings.	Deciding not to continue wearing a face mask post-COVID-19 could be due to factors such as a perceived decrease in the threat of infection, adherence to updated public health guidelines, personal comfort or preference, improved vaccination rates, or a belief that the risk of exposure has significantly reduced. It might also be influenced by societal norms or the absence of specific requirements o…	Protection	Safety	Prevention	Contagion	Crisis	Global	Pandemic	Respiratory	Coronavirus	Before the COVID-19 pandemic, wearing face masks was commonly associated with specific scenarios like healthcare settings or areas with high pollution levels. It wasn't a widespread practice in everyday life in many cultures, so my thoughts were aligned with that understanding. Masks seemed more like a precautionary measure in healthcare or a cultural practice in certain countries rather than som…	Right now, wearing face masks seems like a multi-faceted approach. It's both a tool for personal protection against respiratory illnesses and a way to contribute to communal well-being. The pandemic has reshaped the perception of masks, highlighting their role in mitigating the spread of infectious diseases. There's a more profound understanding of their effectiveness in reducing transmission, es…	2	Fashion masks emerged as a response to the need for face coverings during the pandemic. They brought style and individuality to an otherwise functional item. These masks incorporated various designs, patterns, colors, and materials, allowing people to express themselves while adhering to safety measures. Fashion masks also introduced innovation, with some incorporating filters or adjustable featu…	3	Due to their high filtration efficiency, N95 masks were in high demand during the COVID-19 pandemic, particularly among healthcare workers and individuals in high-risk environments. They offer a higher level of protection compared to cloth masks or surgical masks and are designed to be single-use or limited reuse to maintain their effectiveness. N95 masks are regulated by various standards and ar…	3	Due to their high filtration efficiency, N95 masks were in high demand during the COVID-19 pandemic, particularly among healthcare workers and individuals in high-risk environments. They offer a higher level of protection compared to cloth masks or surgical masks and are designed to be single-use or limited reuse to maintain their effectiveness. N95 masks are regulated by various standards and ar…	7	6	5	6	6	6	7	6	6	5	7	7	6	7	7	6	5	7	2	3	2	3	6	6	7	7	6
1	yes	yes	1	yes	no makes	She is not wearing a face mask.	noun	cloak and disguis	community sprea	transmission	ventilator	It can be very contagious and spreads quickly	Cough.	Fatigue	age 60	old age	2	ful coverup	1	good mask	3	excellent mask	7	6	7	6	5	6	7	6	7	6	6	7	6	7	7	6	6	7	7	6	6	7	7	6	6	7	6
1	pollution and dust was the one reason when I wore mask before covid-19	some unwanted situation	1	It was very healthy and very safety and also very healthy	It makes my health not affected	air	pollution	sneezing	lockdown	stay home	stay healthy	flu	virus	disease	it was only for a dust allergy so otherwise not a serious thought	it makes our life secure	3	it was comfortable for me	3	it was very cheap	3	it was very healthy	4	6	7	7	6	7	6	7	6	6	4	5	6	7	3	6	7	7	6	7	6	7	4	6	7	6	7
1	For protect from air pollution	no reason	1	preventing from other disease	No reason	safty	covid - 19	prevention method	COVID-19	Bubonic plague.worst pandamic disease	Spanish flu	wear mask	Lock down	vaccine	wearing a mask is beneficial in offering protection from pollution and allergens.	easy preventing method from COVID-19	1	low cost and safe	1	low cost and safe	1	low cost and safe	6	7	5	6	7	7	7	7	7	7	7	7	7	7	5	5	5	5	1	1	1	1	7	2	7	7	7
1	to keep me from getting other peoples germs	none	1	i dont want to get sick	none	protection	worry	needed	pain	suffering	death	death	china	hurt	i was protecting myself	iam still protecting myself	3	it help protect me	3	it works the best	3	it is the best	6	7	6	7	7	7	7	7	6	6	7	6	7	7	7	7	7	7	6	5	4	5	6	7	7	7	7
1	medicine	awarness	1	avoid pollution	risk of breathing	cover	our	face	to	protect	face	hide	our beauty	from others	useful	very much liked product	3	original	3	brand	3	like	4	5	5	6	7	6	5	6	5	6	5	5	6	6	7	7	5	6	5	7	5	6	7	6	5	5	5
1	Safety	Prevents You From Getting Sick	1	Keeps You From Spreading Germs	Difficult to Breathing	Reduces Exposure to Allergens	Prevents You From Getting Sick	Protects Immunocompromised	community spread	ventilator	quarantine	Fever	Shortness	difficulty breathing	Safety	Safety	4	good	3	good one	2	good	5	7	6	6	6	6	7	7	7	4	7	5	7	6	4	7	7	7	4	7	6	7	4	7	6	7	5
1	Safety	Danger	1	For my health reason	Solved the problem	Safety	Prevents You From Getting Sick	Protects Immunocompromised.	uncertainty	altered daily routines	financial pressures	Cough	Fatigue	Shortness of breath or difficulty breathing	Keeps You From Spreading Germs.	Masks have been an effective tool for preventing the spread of COVID-19 and its variants,	4	nice	2	comfortable	2	good one	7	6	7	4	7	5	7	5	7	5	7	5	7	7	6	6	5	7	5	7	6	6	6	7	5	7	5
1	STYLE	COVER THE FACE	1	SAFETY	HEALTH	STYLE	SAFETY	COVER THA FACE	NOTHING	NOTHING	NOTHING	SAD	HEALTH	SAFETY	NOTHING	NOTHING	3	NOTHING	3	NOTHING	3	NOTHING	5	6	5	6	5	6	5	6	6	7	6	6	7	6	5	6	5	6	5	6	6	6	6	5	6	6	6
1	Other than preventing or lowering the risk of germ spread, wearing a mask is beneficial in offering protection from pollution and allergens	Protects You From Poor Air Quality	1	These particles may be spread when an infected individual talks, sings, shouts, coughs, or sneezes	not believing that masks are effective or the belief that they are an impingement on their freedom	he Outset Purifying Blue Clay Mask, $46	Neutrogena Hydro Boost and Hydrating Hydro Gel Sheet Mask	safe	loneliness	job loss and financial instability	illness and grief	It can be very contagious and spreads quickly	COVID-19 most often causes respiratory symptoms that can feel much like a cold, the flu, or pneumonia	COVID-19 may attack more than your lungs and respiratory system	offering protection from pollution and allergens	can help protect a healthy person from inadvertently inhaling droplets from an infected person	3	It offers more protection than a medical mask does because it filters out both large and small particles when the wearer inhales.	3	well-fitting NIOSH-approved respirators (including N95s) offer the highest level of protection	3	N95 mask protects you from breathing in small particles in the air such as dust and mold	5	6	7	6	5	7	3	6	6	7	7	7	7	6	5	7	7	7	6	7	6	5	6	7	7	6	6
2	don't wear face masks, as I am a computer program and do not have a physical form. However, before the COVID-19 pandemic, people commonly wore face masks for various reasons, such as protection against air pollution, preventing the spread of respiratory illnesses, and for occupational safety in certain work environments. Masks were also commonly used in healthcare settings to protect both healthc…	Before the COVID-19 pandemic, individuals without specific reasons, such as being in a high-risk occupation or experiencing respiratory issues, typically did not wear face masks as part of their daily routine. The key reason for this was that there was no widespread consensus or public health recommendation advocating for the general population to wear masks in non-occupational or non-medical set…	1	As a computer program, I do not have a physical presence, and therefore, I do not wear face masks or engage in any physical activities. My responses are generated based on the data I've been trained on, and I don't have personal experiences or decisions. However, as of my last knowledge update in January 2022, the decision to wear face masks after the COVID-19 pandemic would be a personal choice …	As a computer program, I don't make decisions, and I don't have personal experiences, preferences, or the ability to wear face masks. My responses are generated based on patterns and information present in the data on which I was trained. However, for individuals in the real world, the decision to continue or stop wearing face masks after the COVID-19 pandemic would depend on various factors. Man…	Protection	Respiratory	Prevention	Global	Contagious	Outbreak	Coronavirus	Pandemic	Respiratory	As a computer program, I don't have personal thoughts, opinions, or experiences. However, before the COVID-19 pandemic, the general public perception of wearing face masks varied depending on cultural, societal, and individual factors. In many Western countries, wearing face masks was not a common practice for the general public in non-occupational settings. Masks were more commonly associated wi…	As a computer program, I don't have personal thoughts or feelings. However, I can provide information based on current knowledge up to January 2022. The decision to wear a face mask is a personal choice that individuals make based on various factors, including public health guidelines, personal health considerations, and the prevalence of respiratory illnesses in their community. As of my last up…	3	he N95 respirator is a type of face mask that is designed to provide a high level of respiratory protection. Here are some reasons why N95 respirators are commonly used: High Filtration Efficiency: N95 respirators are designed to filter out at least 95% of airborne particles, including very small particles such as viruses and bacteria. This high filtration efficiency makes them effective in reduc…	3	he N95 respirator is a type of face mask that is designed to provide a high level of respiratory protection. Here are some reasons why N95 respirators are commonly used: High Filtration Efficiency: N95 respirators are designed to filter out at least 95% of airborne particles, including very small particles such as viruses and bacteria. This high filtration efficiency makes them effective in reduc…	3	he N95 respirator is a type of face mask that is designed to provide a high level of respiratory protection. Here are some reasons why N95 respirators are commonly used: High Filtration Efficiency: N95 respirators are designed to filter out at least 95% of airborne particles, including very small particles such as viruses and bacteria. This high filtration efficiency makes them effective in reduc…	6	5	4	7	5	4	7	6	6	7	6	7	5	6	6	5	7	4	6	5	6	7	6	5	6	7	5
1	for the dust on the outgoing	dust allergies	1	not completely cured covid	none	covid	safety	uncomfortable	work from home	lock down	social distance	killing disease	spreads evrywhere	stop the routine life	for the dust and pollution I usually	for the prevention have to wear mask	1	for the clean and hygeine	4	for the allergies good fabrics is good	1	for the precaution	5	7	6	5	6	6	6	7	5	6	6	6	7	7	5	2	5	6	6	7	6	6	6	7	6	6	5
1	To protect from pollution	None	1	To get rid off COVID	None	Pollution	Disease	skin damages	joy	time	relaxation	safe	care	alert	To had pollution free skin	To get safety control from pollution also	4	It is easy for daily usage	4	for comfortable	4	fr safety	6	7	6	6	6	7	6	4	6	6	6	6	7	6	6	7	6	6	6	5	6	7	6	5	6	7	5
1	safety	yes	1	safety	yes	protaction mask	NFL	N95	SARS	COVID 19	WHO	SAFETY	FACE MASK	LOCKDOWN	offering protection from pollution and allergens.	Other than preventing or lowering the risk of germ spread, wearing a mask is beneficial in offering protection from pollution and allergens.	3	IT IS SAFER THENOTHER Mask	3	IT IS SAFER THENOTHER Mask	3	IT IS SAFER THENOTHER Mask	6	5	5	6	6	5	6	5	6	5	6	6	5	6	6	5	5	6	6	5	6	5	6	7	6	7	6
1	Wearing a mask can protect your respiratory system and general health when there is bad air quality because of pollutants.	Reduces Exposure to Allergens.	1	To protect yourself and others from COVID-19,	A medical condition,	The Outset Purifying Blue Clay Mask	Single Use Disposable Face Mask	Effective Filtration,	uncertainty	daily routinesaltered	financial pressures and social isolation.	uncertainty	daily routinesaltered	financial pressures and social isolation.	offering protection from pollution and allergens	Masks have been an effective tool for preventing the spread of COVID-19 and its variants	4	good	2	good	3	good	7	6	7	6	5	6	7	6	6	7	6	7	6	5	7	6	7	6	7	6	7	6	7	6	7	6	7
1	Protect myself from dust	NA	1	Protect myself from dust and infection	NA	dust	virus	germs	Hunger	Death	Unemployment	Death	Hunger	Virus	To keep myself away from pollution	To keep myself away from pollution and virus infection	3	Protect my body	3	Protect my body	3	Protect my body	7	7	7	7	7	7	7	7	7	7	7	7	7	7	7	6	5	6	4	3	2	1	7	7	7	7	7
2	n/a	I had never had to wear a mask before covid19 because it was not something I thought to do, even though now it makes sense to do it	1	to help mitigate covid19 outbreaks and I wear it now when I have a cold as to not get other people around me sick	n/a	sick	protection	thoughtfulness	sadness	covid19	loss	pandemic	masks	death	I had seen members of asian communities doing it and thought it was strange but now I understand it is to help stop infections and a way of being a good community member and it makes sense now.	I wear a mask now when there are covid19 spikes in the city and if i have a cold, especially on the train/bus. No one needs my cold and if a mask for a few days can help with mitigating a cold and covid19, its easy enough to do.	1	my employer has them avialable for free so i have a bunch stocked up andthey are easy to use and not have to keep track of.	4	I wore these mostly through the pandemic because masks were so hard to find, but they are mostly all now pretty worn out and the surgical mask is easier to deal with.	4	We were able to make and buy cloth masks and since surgical masks were in such short supply i believed they needed to go to first responders and medical staff more then uninfected civilians.	7	7	4	7	7	7	7	1	7	7	7	6	6	7	6	7	7	6	3	3	3	2	5	6	5	5	4
1	smoke	no	1	COVID-19	COVID-19	Protection	Safety	Prevention	Outbreak	Contagion	Crisis	Virus	Pandemic	Quarantine	pollution	dust	1	Protection	1	Infection control	1	Prevention	4	4	6	6	7	6	5	4	4	5	7	4	5	7	7	7	5	5	5	6	5	7	4	5	7	7	6
1	BECAUSE TO AVOID POLLUTION	ONLY USED FOR POLLUTION	2	NO CANNOT CONTINUE	I DONT LIKE TO WEAR BECAUSE ITS VERY DIFFICULT TO BREATH	SAFETY	NON POLUTION	DISEASE	MONEY	KIDS	SCHOOL	JOB	SAFETY	CLEAN	WEARING FACE MASK IS TO KEEP US SAFETY	CURRENTLY FOR POLLUTION	3	VERY GOOD QUALITY AND BREATHABLE	4	IT IS VERY SOFT	3	SAFETY	6	6	7	7	7	7	7	6	6	7	7	7	7	7	4	3	6	6	2	3	1	1	6	6	7	7	7
1	HEALTY ISSUE	YEA	1	YES	AFFECTED THE VIRUS SPREAD SO WE ARE WEAR THE MASK	COMFORTABLE	UNCOMFORTABLE	SAFE ANE SEQURE	YES	NO	YES	PEOPLE ARE SILENT IN THE TIME	NO TRAFFICE NO VEHICLE SOUND	ALL ARE STOP THE TIME	HEALTH PROBLEM DONT AFFECTED ME, SO IAM WEAR THE MASK IN COVID-19	NO	3	IT IS VERY SAFE AND SEQURE	3	SAME REASON	3	NO AFFECTED THE VIRUS	5	6	5	6	6	7	5	6	5	6	6	6	5	7	5	6	7	6	7	6	7	7	6	6	5	6	7
1	COVID-19 pandemic, people commonly wore face masks for various reasons such as protection against air pollution, allergies, or during flu seasons to prevent the spread of respiratory infections.	he key reason for not wearing face masks in everyday life was that there wasn't a widespread understanding or recommendation for the general public to use them as a preventive measure against respiratory illnesses. Face masks were primarily reserved for certain professions (like healthcare workers) or for people with specific health conditions that necessitated their use. The guidance changed dur…	1	Personal Health Concerns: Individuals with compromised immune systems or underlying health conditions may choose to wear masks to reduce the risk of respiratory infections. Preventing Other Illnesses: Face masks can help prevent the spread of not only COVID-19 but also other respiratory infections like the flu or common cold.	Public Health Guidance: If public health authorities and guidelines no longer recommend or require mask-wearing, individuals may choose to follow the official advice. Low Transmission Rates: In regions where the transmission of respiratory infections is low or under control, individuals may feel less compelled to wear masks as the risk diminishes.	Protection	Respiratory	Pandemic	Global	Contagious	Health	Coronavirus	Pandemic	Respiratory	The effectiveness and necessity of wearing face masks for the general public were not widely emphasized or recommended by health authorities in non-pandemic situations. The primary focus was often on other preventive measures such as hand hygiene and vaccination. The widespread adoption of face masks as a preventive measure became more prominent during the COVID-19 pandemic due to the highly cont…	Public opinion and recommendations regarding face masks may evolve based on the progression of the pandemic, the emergence of new variants, and public health guidelines. It's essential to stay informed about the latest guidance from health authorities and adapt behaviors accordingly to contribute to public health efforts.	1	hygienic	1	SURGICAL MASK	1	COST LESS	6	5	6	5	6	5	7	5	5	5	6	5	6	6	5	5	6	5	6	5	5	6	6	5	6	6	6
1	Reduces Exposure to Allergens	lack of breath	1	Wearing a mask reduces the spread of respiratory illnesses within the community by reducing the number of infectious particles that may be inhaled or exhaled.	I am wearing face mask even after covid	covid	pandemic	infection	covid	restless	lockdown	mask	pandemic	work from home	Other than preventing or lowering the risk of germ spread, wearing a mask is beneficial in offering protection from pollution and allergens	Wearing face masks is recommended as part of personal protective equipment and as a public health measure to prevent the spread of coronavirus.	1	may reduce the chance of spreading a COVID-19 infection between you and those around you.	1	it;s low in cost	1	They prevent the spread of infection between sick and well persons.	6	6	5	7	6	6	7	6	6	6	7	6	6	7	5	5	6	7	2	1	1	1	6	6	7	7	6
1	to escape from dust and bad air.	None	1	To protect ourselves from viral attacks.	None	pandemic	virus	restrictions	lockdown	restrictions	home	lockdown	death	vaccine	it is worth to wear at dusty areas.	It is very useful to protect us from Covid-19 virus.	3	It is the high quality mask than others	3	It is the high quality mask than others	3	It is the high quality mask than others	5	5	6	5	4	5	6	6	6	5	5	6	7	6	5	6	6	7	6	7	7	6	6	7	6	5	6
1	Other than preventing or lowering the risk of germ spread, wearing a mask is beneficial in offering protection from pollution and allergens. Here's what else you need to know, including who should wear masks, which masks work best, and how to wear your mask	Here's what else you need to know, including who should wear masks, which masks work best, and how to wear your mask properly.	1	safty	Regardless of COVID-19 case rates, masking is recommended: For 10 days after having a significant exposure to someone who has tested positive for COVID-19.	COVID-19	VIRUS	SAFTY	Fever or chills.	Cough	Fatigue	problems with your memory and concentration ("brain fog")	chest pain or tightness.	difficulty sleeping (insomnia)	Q6. What was your thought about wearing a face mask before the COVID-19 Pandemic? Please explain.	Protects You From Poor Air Quality. Wearing a mask can protect your respiratory system and general health when there is bad air quality because of pollutants. ... Reduces Exposure to Allergens	1	I FEEL SAFETY	1	ITS COMFORT	1	SAFTY	5	6	7	5	6	7	6	7	5	6	7	5	6	7	4	5	6	7	5	6	6	7	5	6	5	6	7
1	Protects You From Poor Air Quality	Disability that precludes wearing a mask. This includes those: For whom a mask could obstruct breathing; Who are unconscious or incapacitated	1	Disability that precludes wearing a mask. This includes those: For whom a mask could obstruct breathing; Who are unconscious or incapacitated	physical discomfort and negative effects, lack of effectiveness	covid	pollution	pandemic	covid	lockdown	restless	mask	cold	cough	Other than preventing or lowering the risk of germ spread, wearing a mask is beneficial in offering protection from pollution and allergens. Here's what else you need to know, including who should wear masks, which masks work best, and how to wear your mask properly.	Masks have been an effective tool for preventing the spread of COVID-19 and its variants, like the omicron variant. Masks also help protect against influenza and other viruses. The Centers for Disease Control and Prevention (CDC) recommends personal masks in public when hospital admissions from COVID-19 are high.	1	Surgical masks are disposable devices that cover the mouth and nose during medical procedures. They prevent the spread of infection between sick and well persons.	1	it's low in cost and effective.	1	Surgical masks are disposable devices that cover the mouth and nose during medical procedures. They prevent the spread of infection between sick and well persons.	6	7	5	6	7	6	7	6	7	6	7	7	7	6	6	6	7	7	2	1	2	1	6	5	6	7	4
1	SAFTY	SECURITY PURPOSE	1	SELF CARE TO ME	PROTECT MY HEALTH	SAFETY	SECURITY	PROTECT	ISOLATED	LACKDOWN	DEAD	FEAR	ALONE	HEALTH ISSUE	PROTECTION FROM ALLERGENS	PROTECT OUR HEALTH	3	COMPARTABLE	3	PROTECTION	3	COMPARTABLE TO ME	5	6	6	6	6	6	7	6	6	7	6	6	6	7	5	6	7	6	6	6	7	6	5	6	7	7	6
2	safe	safe	1	yes	prodect	safe	product	distance	lockdown	facemask	covid-19	easy attract	afraid	fear	safe	no	1	use and through	1	its use and through	1	double layer	6	7	6	6	7	6	7	6	6	7	6	6	7	6	6	7	6	7	6	7	6	7	6	7	6	7	6
1	pollution and cold air, Some are hiding their faces	A normalized masking culture	1	yes	yes	For Hiding our face	Protection from Covid-19	Some frontliners	Social distance	Fomite	Salaiva	Deadly	Virus	Pandemic: COVID-19 is a global pandemic that has affected millions of people worldwide	efore COVID-19, wearing a mask to prevent the spread of illnesses was not the subject of controversy	wearing a mask is beneficial in offering protection from pollution and allergens	2	different colours	2	low budget mask wearing	2	comfort mask	6	7	6	7	6	7	6	7	6	7	6	6	7	6	6	7	6	7	6	7	6	7	6	7	6	7	6
1	Reduces Exposure to Allergens. ...	Prevents You From Getting Sick. ...	1	Keeps You From Spreading Germs.	they can also do more harm than good — especially if they're not used properly or the incorrect mask is used,	covid-19	fever	virus	A disease outbreak is endemic when it is consistently present but limited to a particular region.	the environment or other media	Bubonic plague	"coronavirus disease 2019.”	SARS-CoV-2	long-haul COVID	offering protection from pollution and allergens	one of the most effective tools we have to slow or stop the spread of COVID-19	2	fever	2	i feel the colour	3	good	6	7	6	7	6	7	6	7	6	7	6	7	6	7	6	7	6	7	6	7	6	7	7	6	7	6	7
1	by C Matuschek · 2020 · Cited by 134 — During the COVID-19 pandemic, the use of facemasks seems to be an accepted procedure worldwide although a scientific	Surgical mask, Pandemic crisis, Wound infection, Behavior, Viral transmission, Bacterial transmission, History of medicine	1	To protect yourself and others from COVID-19	You may remove your mask sooner than Day 10 if you have two negative tests in a row, at least one day apart.	protection	self confident	freedom	flu	common	yearly vaccine.	Social distance	social distancing	Self-quarantine	Wearing face masks is recommended as part of personal protective equipment and as a public health measure to prevent	like the omicron variant. Masks also help protect against influenza and other viruses.	3	its protect our self	3	its protect our self	3	its protect our self	6	7	6	7	7	7	7	6	6	7	7	6	7	6	6	7	6	7	6	7	7	6	6	6	7	6	7
1	Before COVID-19, people typically wore face masks for reasons related to air pollution or to protect themselves from allergens, especially in densely populated urban areas or during high pollen seasons. In some cultures, people also wore masks for personal health reasons or during flu seasons to prevent the spread of illness.	The primary reason many people had no experience wearing face masks before COVID-19 was simply that there wasn't a widespread societal need or cultural norm for it in many parts of the world. In regions where air quality was relatively good or where there weren't prevalent health concerns that necessitated mask-wearing, people didn't regularly use face masks as a part of their daily routines. The…	1	I don't wear face masks myself, but many individuals choose to continue wearing masks after COVID-19 for various reasons. Some might do so out of personal comfort, especially if they feel safer or more at ease with added protection in crowded or enclosed spaces. Others might have underlying health conditions that make them more susceptible to respiratory illnesses, prompting them to continue usin…	I don't make decisions about wearing face masks, but some individuals may choose not to continue wearing masks after COVID-19 for various reasons. One primary reason could be the decrease in perceived risk. If the prevalence of the virus significantly decreases or if public health guidelines no longer recommend mask-wearing in certain settings, some people might feel comfortable returning to thei…	Protection	Prevention	Comfort	Contagion	Global	Health crisis	Coronavirus	Lockdown	Vaccination	Before the COVID-19 pandemic, the context around wearing face masks was quite different. Masks were commonly associated with medical settings or specific cultural practices in certain regions, like parts of East Asia, where people might wear masks for personal health reasons or due to air pollution. In many other parts of the world, wearing face masks wasn't a prevalent practice in everyday life.…	As of my last update, wearing face masks had become a widely accepted practice due to the COVID-19 pandemic. They served as a crucial tool in reducing the spread of respiratory droplets and mitigating the transmission of the virus, benefiting both the wearer and those around them. Masks were highly recommended in indoor or crowded settings, especially when social distancing wasn't feasible. The d…	3	N95 masks: These provide high filtration efficiency and are recommended for situations with higher exposure risks, like healthcare settings or areas with poor air quality.	4	Cloth masks: These are reusable and come in various designs. They're often comfortable and can be washed for reuse, making them environmentally friendly.	3	N95 masks: These provide high filtration efficiency and are recommended for situations with higher exposure risks, like healthcare settings or areas with poor air quality.	7	6	7	6	7	6	7	7	6	7	7	6	7	7	6	6	7	7	6	7	7	7	6	7	6	7	6
1	Jun 23, 2020 · During the COVID-19 pandemic, the use of facemasks seems to be an accepted procedure worldwide although a scientific discussion is going on up	May 12, 2021 · Although, most clothing companies were not making face masks from the fabric before the pandemic because there was not a need for the product.	1	12	4	delivered	physical	distancing	Crisp, Clean	Cotton sheets	selflessness	people have died from COVID-19 in the United States. COVID-19 most often causes respiratory symptoms that can feel much like a cold, the flu, or pneumonia. COVID-19 may attack more than your lungs and respiratory system.	people have died from COVID-19 in the United States. COVID-19 most often causes respiratory symptoms that can feel much like a cold, the flu, or pneumonia. COVID-19 may attack more than your lungs and respiratory system.	people have died from COVID-19 in the United States. COVID-19 most often causes respiratory symptoms that can feel much like a cold, the flu, or pneumonia. COVID-19 may attack more than your lungs and respiratory system.	21	10	4	Question: PLEASE WRITE THE REASONS FOR THE ANSWERS: (Write the reason for your answer, explain your answer with one or two sentences). PLEASE WRITE THE REASONS	1	Question: PLEASE WRITE THE REASONS FOR THE ANSWERS: (Write the reason for your answer, explain your answer with one or two sentences). PLEASE WRITE THE REASONS	2	Question: PLEASE WRITE THE REASONS FOR THE ANSWERS: (Write the reason for your answer, explain your answer with one or two sentences). PLEASE WRITE THE REASONS	6	6	5	7	6	7	6	5	5	6	7	6	7	6	5	6	7	6	6	7	6	7	6	7	6	7	6
1	Protects Immunocompromised.	Reduces Exposure to Allergens.	1	Masks can help hydrate skin, remove excess oils and help improve the appearance of pores—while providing a relaxing, spa-like experience at home.	physical discomfort and negative effects, lack of effectiveness, and being unnecessary or inappropriate for certain people or under certain circumstances.	face covering	protective mask	goggles	vaccine	H1N1 flu	endemic virus	Fever or chills.	Cough	Fatigue.	preventing or lowering the risk of germ spread, wearing a mask is beneficial in offering protection from pollution and allergens. Here's what else you need to know, including who should wear masks, which masks work best, and how to wear your mask properly	Masks have been an effective tool for preventing the spread of COVID-19 and its variants, like the omicron variant. Masks also help protect against influenza and other viruses. The Centers for Disease Control and Prevention (CDC) recommends personal masks in public when hospital admissions from COVID-19 are high	2	Similar to an outbreak, an epidemic is defined by being contained in a small population, but the number of cases is larger than normally expected. Other examples of epidemics in our modern world include yellow fever, smallpox, and West Nile.	4	Wearing masks, or facial coverings, protects us and others from droplets spread by breathing, coughing, sneezing, singing, or laughing. It is these droplets that can carry a virus from one person to another.	4	Wearing masks, or facial coverings, protects us and others from droplets spread by breathing, coughing, sneezing, singing, or laughing. It is these droplets that can carry a virus from one person to another.	6	5	6	7	6	5	6	6	6	7	6	6	5	6	6	5	6	7	7	6	7	6	6	7	7	6	7
1	Wearing a mask can protect your respiratory system and general health when there is bad air quality because of pollutants	Keeps You From Spreading Germs	1	To protect yourself and others from COVID-19,	Reduces Exposure to Allergens	She is not wearing a face mask.	cloak and disguise	Protects Immunocompromised	a pandemic	An epidemic is a disease outbreak	multiple regions across	altered daily routines	financial pressures and social isolation	uncertainty	offering protection from pollution and allergens	to lower their exposure (contact) to respiratory viruses	3	good	4	good	4	good	7	6	7	6	7	6	7	6	7	6	7	5	6	7	7	6	7	6	7	6	7	6	7	6	7	6	7
1	To protect from sun	Its not under the rules	1	for safety	no	to cover face	protect from sun	protect from diseases	safety	protects from fever	healthy	fever	cold	tired	for our safety	now this time i wear mask for protect the face from dust	1	It is comfortable	1	It is comfortable	1	It is comfortable	7	6	7	6	7	7	6	5	7	6	7	7	6	5	7	6	7	6	7	6	7	6	7	6	7	7	6
1	During the COVID-19 pandemic, the use of facemasks seems to be an accepted procedure worldwide although a scientific discussion is going on	Prevents You From Getting Sick	1	Masks can help hydrate skin, remove excess oils and help improve the appearance of pore	The Centers for Disease Control and Prevention (CDC) recommends personal masks in public when hospital admissions from COVID-19 are high	Reduces Exposure to Allergens	Prevents You From Getting Sick	Protects Immunocompromised	community spread	transmission	asymptomatic	Martial law	Self-quarantine	Index case	Wearing face masks is recommended as part of personal protective equipment and as a public health measure to prevent	Masks have been an effective tool for preventing the spread of COVID-19 and its variants	3	since main	3	since main	3	since main	7	6	5	6	7	7	6	7	7	6	7	6	7	7	7	6	7	7	6	7	6	7	6	7	6	7	7
2	NA	I ain't get sick mostly	2	NA	because the covid is over	protection	pandemic	health	Health crisis	global impact	containment	Virus	pandemic	respiratory	yeah, its good and helps for improving our health	I dont think its necessary to wear facemask currently	2	i used to wear mask with matching color of my dress	4	homemade masks are cheap and reuseble	3	N95 mask is said to be more secure than other masks	7	7	6	7	6	7	5	6	6	6	7	3	6	5	7	7	7	7	2	2	2	2	7	7	7	7	7
1	amount reduction	amount reception	1	yep	nope	face	mask	whitining	pandemic	epidemic	sugar	fever	cough	struggle	its so hsrd that times and i really suffered	its mean by the pandemic one	3	nope	2	nope	2	nope	7	6	6	5	6	7	7	6	5	6	6	6	7	7	6	5	7	7	6	5	6	7	6	6	7	6	5
2	did not wear one	no heath or safety reason	2	do not wear one	no heath need to wear a mask	protection	health	safety	fear	threat	sickness	fear	health	sickness	for one's own safety and protection	no need for any type of mask wearing	1	protection	1	self protection	1	safety concerns	3	6	6	6	7	7	7	7	7	7	7	5	5	5	6	6	7	7	5	1	2	3	6	7	6	6	6
1	safety	health	1	yes	safe	safety	Cetaphil Derma Control Purifying Clay Mask	First Aid Beauty Ultra Repair Oatmeal Mask	safety	health	dust	danger	safe	recover	good	yes	1	safe	1	useandthrow	1	outing	7	7	7	7	7	6	7	7	7	6	7	7	6	7	7	7	6	7	7	6	7	7	7	7	7	7	7
1	avoid getting sick	not needed	1	avoid getting sick	too hot	cover	sick	asian	sick	die	fever	die	travel	home	never thought I needed it	it's better to wear in some places to avoid getting sick	1	cheap and convenient	1	easy to get	1	easy to use	7	7	7	7	7	7	7	4	4	4	4	5	5	5	7	7	7	7	1	1	1	1	5	5	5	5	1
2	I didn't.	It didn't seem necessary. If I got a cold or something, I just dealt with it.	2	I'm not.	It dosn't seem necessary, just like it wasn't necessary before Covid.	constricting	difficult	hot	Covid	danger	death	endemic	coughing	sick	I didn't think much about it, and didn't think it was necessary.	It doesn't seem necessary unless you have a high amount of risk.	4	During the covid pandemic it was the easiest kind to get and wear.	4	It seems easier to breathe through it, if I need to wear it.	1	Later on, it was said to work better.	2	5	1	7	7	7	7	7	7	7	7	4	4	4	7	1	4	4	4	4	4	4	4	4	4	4	4
1	A relative was undergoing chemotherapy and I wanted to prevent them from getting sick.	N/A	1	I don't want myself/others to get sick.	N/A	Comfort	Relief	Warmth	Death	Sickness	Debt	Death	Sickness	Debt	It seemed like the right thing to do and was an easy thing to do.	It is the right thing to do and is so incredibly easy, plus I get to hide my disgusted expression at having to constantly be around people who refuse to mask.	3	It's the one proven to be most effective when around others, especially those who refuse to mask themselves.	3	It's the one proven to be most effective when around others, especially those who refuse to mask themselves.	4	Everyone was masking at the time so as long as something was covering your nose and mouth, it was deemed acceptable at the time. We know more now.	7	7	7	7	7	7	7	7	7	6	7	7	7	7	7	7	7	7	7	7	7	7	7	7	7	7	7
1	To limit the spread of COVID-19.	Vanity	1	I am a caretaker to an elderly couple with a lot of health problems.	To protect my loved ones.	safe	consideration	smart	scary	emergency	death	deadly	lockdown	congestion	It never occurred to me to do so.	I am willing to do it while COVID-19 and flu season are still raging.	1	Most effective and easily available	4	It's more fun	4	They were what I had access to, we were discouraged from using medical supplies.	6	7	4	7	7	7	7	2	5	5	6	7	7	7	7	6	6	6	2	3	1	2	6	6	7	7	4
2	I never did.	Because I didn't feel like it was necessary.	2	I do not wish to wear a mask anymore.	I feel like the major threat is over.	protection	key	worthy	scary	manic	thoughtful	scary	germs	sick	I thought that only Asians did it.	I feel like it's an option and it's normal.	4	I wear a plain black fabric mask because it's not too busy.	4	It's not too busy.	4	It blended well with my clothes.	1	7	1	7	2	7	7	7	7	7	7	1	1	1	7	7	7	7	5	5	5	5	7	7	7	7	7
1	Prevents From Getting Sick.	NOT SERIOUS ABOUT THE SITUATION	1	Protects You From Poor Air Quality.	EVERY THING WILL BE NORMAL	COVID-19	SAFETY	PREVENTION	PROTECTION	SAFETY	HELPING	FEAR	PANDEMIC	DISEASES	FOR THE SIMPLE SAFETY PURPOSE	The CDC says that you should wear the most protective mask that you'll wear regularly, fits well and is comfortable.	3	BETTER THAN THE OTHER TYPE MASK	1	CHEAPER THAN OTHER MASK	3	I BELIEVE IT MORE SAFETY	7	7	7	7	7	7	7	7	7	7	7	7	7	7	7	7	7	7	2	2	2	2	7	7	7	7	7
2	be an accepted procedure worldwide	accepted procedure	1	To protect myself and others from COVID-19	physical discomfort and negative effects	safe	secure	relax	fear	lonely	health	Social distance	Self-quarantine	depression	Other than preventing or lowering the risk of germ spread, wearing a mask is beneficial in offering protection from pollution and allergens.	Masks have been an effective tool for preventing the spread of COVID-19 and its variants, like the omicron variant.	1	Unfortunately, most disposable surgical masks do not offer a sufficient level of protection against airborne viruses, as these loose-fitting masks are designed at keeping out particulates and fluids. An N95 is much more effective because it forms a close seal around your nose and mouth.	3	N95 respirators provide more protection than cloth or nylon masks, which can't do much to guard against inhaling viral-sized particles. If you need to wear a cloth mask and are looking for more protection.	3	N95 masks offer the highest level of protection.	7	7	7	7	7	7	7	7	7	7	7	7	7	7	7	7	7	7	1	1	1	1	7	7	7	7	7
[truncated: 92 more columns]
